# Supplementary material for: The molecular chaperone TRAP1 promotes translation of Luc7I3 mRNA to enhance ovarian cancer cell proliferation
Source: bioRxiv preprint, doi:10.1101/2025.04.01.646636, version 1 (2025-04-03)
Supplement: Supplementary_Table_1 [file 646636_file04.xlsx]

## Sheet: Sheet1
rbp_peak_info
Chromosome	Start	End	Strand	Reproducibility	log2(fold change)	Gene name	Ensembl ID	Feature
chr10	12035152	12035175	-	0.99	6.336	UPF2	ENSG00000151461.20	CDS
chr10	12035136	12035152	-	0.99	6.264	UPF2	ENSG00000151461.20	CDS
chrX	81114684	81114725	-	0.99	6.19	HMGN5	ENSG00000198157.11	CDS
chr10	12035175	12035220	-	0.99	6.045	UPF2	ENSG00000151461.20	CDS
chrX	81115017	81115103	-	0.99	5.981	HMGN5	ENSG00000198157.11	CDS
chrX	81114653	81114684	-	0.98	5.908	HMGN5	ENSG00000198157.11	CDS
chr2	99363806	99363835	+	0.99	5.869	EIF5B	ENSG00000158417.11	CDS
chr2	99363699	99363717	+	0.99	5.827	EIF5B	ENSG00000158417.11	CDS
chrX	81114725	81114733	-	0.99	5.821	HMGN5	ENSG00000198157.11	CDS
chr2	99363669	99363699	+	0.99	5.784	EIF5B	ENSG00000158417.11	CDS
chr2	99364272	99364287	+	0.98	5.76	EIF5B	ENSG00000158417.11	CDS
chr2	99363835	99363858	+	0.99	5.681	EIF5B	ENSG00000158417.11	CDS
chr2	99363654	99363669	+	0.99	5.633	EIF5B	ENSG00000158417.11	CDS
chr5	16702970	16703021	-	0.99	5.585	MYO10	ENSG00000145555.15	CDS
chr5	72195390	72195418	+	0.99	5.563	MAP1B	ENSG00000131711.15	CDS
chr10	12035124	12035136	-	0.99	5.562	UPF2	ENSG00000151461.20	CDS
chr8	67158515	67158597	+	0.99	5.536	CSPP1	ENSG00000104218.16	CDS
chr2	99363799	99363806	+	0.99	5.457	EIF5B	ENSG00000158417.11	CDS
chr2	99363647	99363654	+	0.97	5.426	EIF5B	ENSG00000158417.11	CDS
chr2	99364270	99364272	+	0.99	5.369	EIF5B	ENSG00000158417.11	CDS
chr2	99363717	99363744	+	0.99	5.348	EIF5B	ENSG00000158417.11	CDS
chr2	99363644	99363647	+	0.99	5.342	EIF5B	ENSG00000158417.11	CDS
chr2	99363744	99363771	+	0.99	5.323	EIF5B	ENSG00000158417.11	CDS
chr2	99363771	99363799	+	0.98	5.323	EIF5B	ENSG00000158417.11	CDS
chr10	12035220	12035241	-	0.98	5.306	UPF2	ENSG00000151461.20	CDS
chr2	231460510	231460522	-	0.99	5.279	NCL	ENSG00000115053.17	CDS
chr2	231460529	231460532	-	0.99	5.262	NCL	ENSG00000115053.17	CDS
chrX	81114733	81114836	-	0.99	5.235	HMGN5	ENSG00000198157.11	CDS
chr2	99363858	99363862	+	0.99	5.233	EIF5B	ENSG00000158417.11	CDS
chr1	91643974	91643981	+	0.99	5.187	HSP90B3P	ENSG00000203914.4	ncRNA
chr2	232819939	232819986	+	0.99	5.183	GIGYF2	ENSG00000204120.16	CDS
chr5	72195358	72195390	+	0.99	5.179	MAP1B	ENSG00000131711.15	CDS
chrX	81115103	81115221	-	0.99	5.173	HMGN5	ENSG00000198157.11	CDS
chr2	231460522	231460529	-	0.99	5.171	NCL	ENSG00000115053.17	CDS
chr5	16702961	16702970	-	0.99	5.17	MYO10	ENSG00000145555.15	CDS
chrX	81114953	81115017	-	0.99	5.163	HMGN5	ENSG00000198157.11	CDS
chr14	102084950	102084954	-	0.99	5.162	HSP90AA1	ENSG00000080824.19	CDS
chr14	102084946	102084950	-	0.99	5.128	HSP90AA1	ENSG00000080824.19	CDS
chr5	16702539	16702594	-	0.97	5.126	MYO10	ENSG00000145555.15	CDS
chr2	99364287	99364351	+	0.99	5.115	EIF5B	ENSG00000158417.11	CDS
chr10	12035241	12035284	-	0.99	5.114	UPF2	ENSG00000151461.20	CDS
chr10	119056938	119056973	-	0.99	5.113	EIF3A	ENSG00000107581.13	CDS
chr5	72195418	72195473	+	0.98	5.11	MAP1B	ENSG00000131711.15	CDS
chr2	231460502	231460510	-	0.98	5.107	NCL	ENSG00000115053.17	CDS
chr6	30577861	30577913	+	0.99	5.099	ABCF1	ENSG00000204574.14	CDS
chr3	169982817	169982827	+	0.98	5.095	SEC62	ENSG00000008952.17	CDS
chr7	134947718	134947749	+	0.99	5.085	CALD1	ENSG00000122786.20	CDS
chr2	231460532	231460549	-	0.99	5.075	NCL	ENSG00000115053.17	CDS
chr5	16701835	16701839	-	0.98	5.065	MYO10	ENSG00000145555.15	CDS
chr5	16702947	16702957	-	0.97	5.044	MYO10	ENSG00000145555.15	CDS
chrX	81116234	81116260	-	0.99	5.032	HMGN5	ENSG00000198157.11	CDS
chr5	16702957	16702961	-	0.98	5.025	MYO10	ENSG00000145555.15	CDS
chr2	232819920	232819939	+	0.99	5.016	GIGYF2	ENSG00000204120.16	CDS
chr2	231460484	231460502	-	0.99	5.008	NCL	ENSG00000115053.17	CDS
chr2	231460549	231460552	-	0.99	5	NCL	ENSG00000115053.17	CDS
chrX	81116206	81116234	-	0.98	4.99	HMGN5	ENSG00000198157.11	CDS
chr14	102084954	102084967	-	0.99	4.985	HSP90AA1	ENSG00000080824.19	CDS
chr2	231460552	231460561	-	0.99	4.978	NCL	ENSG00000115053.17	CDS
chr12	79797283	79797320	-	0.99	4.954	PPP1R12A	ENSG00000058272.19	CDS
chr5	16702926	16702947	-	0.99	4.941	MYO10	ENSG00000145555.15	CDS
chr6	30577849	30577861	+	0.99	4.941	ABCF1	ENSG00000204574.14	CDS
chr2	99376347	99376410	+	0.98	4.941	EIF5B	ENSG00000158417.11	CDS
chr2	231460561	231460570	-	0.99	4.931	NCL	ENSG00000115053.17	CDS
chr2	202300326	202300366	+	0.98	4.919	NOP58	ENSG00000055044.11	CDS
chr2	202303421	202303444	+	0.98	4.915	NOP58	ENSG00000055044.11	CDS
chr8	123372662	123372691	-	0.99	4.91	ATAD2	ENSG00000156802.13	CDS
chr20	41081229	41081236	+	0.99	4.898	TOP1	ENSG00000198900.7	CDS
chr2	99361652	99361671	+	0.98	4.876	EIF5B	ENSG00000158417.11	CDS
chr20	41081194	41081229	+	0.99	4.865	TOP1	ENSG00000198900.7	CDS
chr14	102084805	102084808	-	0.98	4.86	HSP90AA1	ENSG00000080824.19	CDS
chr17	4672141	4672149	-	0.99	4.846	PELP1	ENSG00000141456.16	CDS
chr17	50745868	50745893	+	0.97	4.841	LUC7L3	ENSG00000108848.16	CDS
chr12	103938429	103938433	+	0.99	4.84	HSP90B1	ENSG00000166598.16	CDS
chr2	232832902	232832927	+	0.99	4.838	GIGYF2	ENSG00000204120.16	CDS
chr14	102084967	102084999	-	0.99	4.837	HSP90AA1	ENSG00000080824.19	CDS
chr10	42796787	42796802	+	0.98	4.833	BMS1	ENSG00000165733.8	CDS
chr14	102084818	102084821	-	0.99	4.827	HSP90AA1	ENSG00000080824.19	CDS
chr2	202303384	202303421	+	0.99	4.822	NOP58	ENSG00000055044.11	CDS
chr14	102084808	102084812	-	0.99	4.804	HSP90AA1	ENSG00000080824.19	CDS
chr14	102084812	102084818	-	0.99	4.804	HSP90AA1	ENSG00000080824.19	CDS
chr10	42796802	42796911	+	0.98	4.803	BMS1	ENSG00000165733.8	CDS
chr2	231460479	231460484	-	0.99	4.798	NCL	ENSG00000115053.17	CDS
chr6	30577817	30577849	+	0.99	4.795	ABCF1	ENSG00000204574.14	CDS
chr14	73106280	73106286	+	0.99	4.79	RBM25	ENSG00000119707.14	CDS
chr2	231461801	231461835	-	0.99	4.788	NCL	ENSG00000115053.17	CDS
chr2	231461835	231461844	-	0.99	4.787	NCL	ENSG00000115053.17	CDS
chr12	103939566	103939570	+	0.99	4.786	HSP90B1	ENSG00000166598.16	CDS
chr20	41084540	41084546	+	0.98	4.785	TOP1	ENSG00000198900.7	CDS
chr12	103938433	103938440	+	0.98	4.782	HSP90B1	ENSG00000166598.16	CDS
chr12	103939570	103939578	+	0.99	4.779	HSP90B1	ENSG00000166598.16	CDS
chrX	81116260	81116304	-	0.99	4.774	HMGN5	ENSG00000198157.11	CDS
chr2	99376430	99376572	+	0.99	4.768	EIF5B	ENSG00000158417.11	CDS
chr7	134947749	134947769	+	0.99	4.768	CALD1	ENSG00000122786.20	CDS
chr14	102084799	102084805	-	0.99	4.757	HSP90AA1	ENSG00000080824.19	CDS
chr15	50481693	50481807	+	0.99	4.745	USP8	ENSG00000138592.14	CDS
chr3	168010749	168010816	-	0.99	4.744	GOLIM4	ENSG00000173905.9	CDS
chr2	202302962	202303024	+	0.99	4.743	NOP58	ENSG00000055044.11	CDS
chr9	98011356	98011389	+	0.98	4.737	ANP32B	ENSG00000136938.9	CDS
chr12	103938419	103938422	+	0.99	4.736	HSP90B1	ENSG00000166598.16	CDS
chr10	119049800	119049836	-	0.99	4.732	EIF3A	ENSG00000107581.13	CDS
chr10	119056973	119057024	-	0.99	4.732	EIF3A	ENSG00000107581.13	CDS
chr3	168024529	168024541	-	0.99	4.729	GOLIM4	ENSG00000173905.9	CDS
chr2	231460477	231460479	-	0.99	4.724	NCL	ENSG00000115053.17	CDS
chr14	102084866	102084874	-	0.99	4.723	HSP90AA1	ENSG00000080824.19	CDS
chr12	103938422	103938426	+	0.99	4.721	HSP90B1	ENSG00000166598.16	CDS
chr11	77886567	77886658	+	0.99	4.718	AAMDC	ENSG00000087884.16	Intron
chr5	16703021	16703066	-	0.99	4.716	MYO10	ENSG00000145555.15	CDS
chr17	50745847	50745868	+	0.99	4.715	LUC7L3	ENSG00000108848.16	CDS
chr14	102084821	102084856	-	0.98	4.714	HSP90AA1	ENSG00000080824.19	CDS
chr12	95483277	95483288	+	0.98	4.712	METAP2	ENSG00000111142.14	CDS
chr17	4672135	4672141	-	0.98	4.711	PELP1	ENSG00000141456.16	CDS
chr1	91643970	91643974	+	0.99	4.705	HSP90B3P	ENSG00000203914.4	ncRNA
chr1	91643906	91643940	+	0.99	4.702	HSP90B3P	ENSG00000203914.4	ncRNA
chr3	168032632	168032685	-	0.99	4.701	GOLIM4	ENSG00000173905.9	CDS
chr14	102084874	102084879	-	0.99	4.698	HSP90AA1	ENSG00000080824.19	CDS
chr12	103938408	103938417	+	0.99	4.698	HSP90B1	ENSG00000166598.16	CDS
chr10	12042805	12042824	-	0.99	4.697	UPF2	ENSG00000151461.20	5' UTR
chr12	103938426	103938429	+	0.98	4.697	HSP90B1	ENSG00000166598.16	CDS
chrX	53412020	53412126	-	0.98	4.694	SMC1A	ENSG00000072501.19	CDS
chr17	50745904	50745912	+	0.98	4.69	LUC7L3	ENSG00000108848.16	CDS
chr14	102084879	102084885	-	0.99	4.688	HSP90AA1	ENSG00000080824.19	CDS
chr1	91643940	91643945	+	0.98	4.686	HSP90B3P	ENSG00000203914.4	ncRNA
chr2	99371656	99371730	+	0.99	4.686	EIF5B	ENSG00000158417.11	CDS
chr1	91643945	91643949	+	0.97	4.685	HSP90B3P	ENSG00000203914.4	ncRNA
chr13	106559634	106559657	-	0.99	4.685	ARGLU1	ENSG00000134884.15	CDS
chr7	134933330	134933349	+	0.99	4.685	CALD1	ENSG00000122786.20	CDS
chr2	232832927	232832947	+	0.99	4.685	GIGYF2	ENSG00000204120.16	CDS
chr6	44250454	44250469	+	0.98	4.682	HSP90AB1	ENSG00000096384.20	CDS
chr12	103938417	103938419	+	0.99	4.679	HSP90B1	ENSG00000166598.16	CDS
chr10	12035308	12035420	-	0.98	4.676	UPF2	ENSG00000151461.20	CDS
chr17	4672149	4672170	-	0.99	4.673	PELP1	ENSG00000141456.16	CDS
chr12	103939535	103939566	+	0.98	4.668	HSP90B1	ENSG00000166598.16	CDS
chr5	72195295	72195358	+	0.99	4.663	MAP1B	ENSG00000131711.15	CDS
chr10	119050560	119050584	-	0.98	4.658	EIF3A	ENSG00000107581.13	CDS
chr11	130121778	130121783	+	0.98	4.658	APLP2	ENSG00000084234.18	CDS
chr1	235213855	235213920	-	0.99	4.658	ARID4B	ENSG00000054267.22	CDS
chr2	231460667	231460671	-	0.98	4.655	NCL	ENSG00000115053.17	CDS
chr15	41464766	41464840	+	0.99	4.654	RTF1	ENSG00000137815.15	CDS
chr12	103938405	103938408	+	0.99	4.654	HSP90B1	ENSG00000166598.16	CDS
chr5	72196185	72196197	+	0.98	4.644	MAP1B	ENSG00000131711.15	CDS
chr12	103939578	103939588	+	0.99	4.641	HSP90B1	ENSG00000166598.16	CDS
chr5	72196368	72196397	+	0.98	4.64	MAP1B	ENSG00000131711.15	CDS
chr7	134933290	134933330	+	0.99	4.64	CALD1	ENSG00000122786.20	CDS
chr5	16701793	16701835	-	0.99	4.638	MYO10	ENSG00000145555.15	CDS
chr15	44551519	44551523	+	0.98	4.635	EIF3J	ENSG00000104131.13	CDS
chrX	81114836	81114953	-	0.99	4.628	HMGN5	ENSG00000198157.11	CDS
chr17	50746632	50746702	+	0.98	4.626	LUC7L3	ENSG00000108848.16	CDS
chr14	102085328	102085377	-	0.98	4.626	HSP90AA1	ENSG00000080824.19	CDS
chr8	123372650	123372662	-	0.99	4.625	ATAD2	ENSG00000156802.13	CDS
chr17	4672170	4672190	-	0.99	4.618	PELP1	ENSG00000141456.16	CDS
chr12	103938402	103938405	+	0.98	4.618	HSP90B1	ENSG00000166598.16	CDS
chr6	75890245	75890266	+	0.98	4.617	MYO6	ENSG00000196586.17	CDS
chr12	95483270	95483277	+	0.98	4.617	METAP2	ENSG00000111142.14	CDS
chr5	160404808	160404879	-	0.99	4.614	SLU7	ENSG00000164609.10	CDS
chr14	34800249	34800275	-	0.99	4.613	BAZ1A	ENSG00000198604.11	CDS
chr2	99361671	99361760	+	0.97	4.612	EIF5B	ENSG00000158417.11	CDS
chr12	103938440	103938459	+	0.98	4.612	HSP90B1	ENSG00000166598.16	CDS
chr14	102084856	102084862	-	0.99	4.611	HSP90AA1	ENSG00000080824.19	CDS
chr17	50745893	50745904	+	0.99	4.609	LUC7L3	ENSG00000108848.16	CDS
chr10	12035284	12035308	-	0.98	4.607	UPF2	ENSG00000151461.20	CDS
chr5	72195500	72195548	+	0.99	4.607	MAP1B	ENSG00000131711.15	CDS
chr20	41081236	41081244	+	0.96	4.605	TOP1	ENSG00000198900.7	CDS
chr14	102084862	102084866	-	0.99	4.605	HSP90AA1	ENSG00000080824.19	CDS
chr14	102084937	102084946	-	0.99	4.604	HSP90AA1	ENSG00000080824.19	CDS
chr5	16702923	16702926	-	0.99	4.601	MYO10	ENSG00000145555.15	CDS
chr2	99361477	99361501	+	0.98	4.6	EIF5B	ENSG00000158417.11	CDS
chr2	231461844	231461863	-	0.99	4.598	NCL	ENSG00000115053.17	CDS
chr20	41084487	41084529	+	0.99	4.597	TOP1	ENSG00000198900.7	CDS
chr14	73110888	73110902	+	0.98	4.597	RBM25	ENSG00000119707.14	CDS
chr5	72195548	72195574	+	0.99	4.596	MAP1B	ENSG00000131711.15	CDS
chr12	103947346	103947350	+	0.98	4.596	HSP90B1	ENSG00000166598.16	CDS
chr4	4274553	4274676	-	0.99	4.595	LYAR	ENSG00000145220.14	CDS
chr12	103947427	103947432	+	0.98	4.595	HSP90B1	ENSG00000166598.16	CDS
chr2	231461726	231461728	-	0.98	4.588	NCL	ENSG00000115053.17	CDS
chr2	231463201	231463203	-	0.99	4.583	NCL	ENSG00000115053.17	CDS
chr2	231463197	231463201	-	0.99	4.582	NCL	ENSG00000115053.17	CDS
chr14	102084770	102084799	-	0.96	4.581	HSP90AA1	ENSG00000080824.19	CDS
chr2	202302913	202302962	+	0.98	4.58	NOP58	ENSG00000055044.11	CDS
chr12	95494055	95494059	+	0.98	4.577	METAP2	ENSG00000111142.14	CDS
chr5	72196301	72196368	+	0.99	4.574	MAP1B	ENSG00000131711.15	CDS
chr5	163483270	163483283	+	0.99	4.573	HMMR	ENSG00000072571.20	CDS
chr15	56444573	56444641	-	0.99	4.571	MNS1	ENSG00000138587.6	CDS
chr17	4672115	4672135	-	0.98	4.57	PELP1	ENSG00000141456.16	CDS
chr12	103938399	103938402	+	0.98	4.566	HSP90B1	ENSG00000166598.16	CDS
chr8	123370987	123370990	-	0.98	4.564	ATAD2	ENSG00000156802.13	CDS
chr9	98015409	98015423	+	0.99	4.56	ANP32B	ENSG00000136938.9	CDS
chrX	53411996	53412020	-	0.99	4.559	SMC1A	ENSG00000072501.19	CDS
chr14	102084934	102084937	-	0.99	4.559	HSP90AA1	ENSG00000080824.19	CDS
chr12	103939588	103939602	+	0.99	4.557	HSP90B1	ENSG00000166598.16	CDS
chr20	41084546	41084572	+	0.98	4.553	TOP1	ENSG00000198900.7	CDS
chr9	98015394	98015409	+	0.98	4.552	ANP32B	ENSG00000136938.9	CDS
chr10	119049836	119049875	-	0.98	4.552	EIF3A	ENSG00000107581.13	CDS
chrX	53409233	53409269	-	0.98	4.55	SMC1A	ENSG00000072501.19	CDS
chr14	102084926	102084934	-	0.99	4.546	HSP90AA1	ENSG00000080824.19	CDS
chr20	41084529	41084540	+	0.99	4.543	TOP1	ENSG00000198900.7	CDS
chr14	73106194	73106198	+	0.99	4.542	RBM25	ENSG00000119707.14	CDS
chr12	103938393	103938396	+	0.99	4.542	HSP90B1	ENSG00000166598.16	CDS
chr3	143038894	143038957	+	0.99	4.541	U2SURP	ENSG00000163714.18	CDS
chr2	232832874	232832902	+	0.99	4.541	GIGYF2	ENSG00000204120.16	CDS
chr6	44250415	44250454	+	0.99	4.539	HSP90AB1	ENSG00000096384.20	CDS
chr5	72195473	72195500	+	0.99	4.539	MAP1B	ENSG00000131711.15	CDS
chr2	231462001	231462022	-	0.99	4.539	NCL	ENSG00000115053.17	CDS
chr7	134933349	134933390	+	0.99	4.538	CALD1	ENSG00000122786.20	CDS
chr2	231461728	231461770	-	0.98	4.536	NCL	ENSG00000115053.17	CDS
chr14	55634585	55634595	+	0.99	4.535	KTN1	ENSG00000126777.18	CDS
chr14	102084919	102084926	-	0.98	4.535	HSP90AA1	ENSG00000080824.19	CDS
chr14	73106198	73106251	+	0.99	4.534	RBM25	ENSG00000119707.14	CDS
chr14	102084697	102084751	-	0.99	4.534	HSP90AA1	ENSG00000080824.19	CDS
chr3	143038957	143038968	+	0.98	4.532	U2SURP	ENSG00000163714.18	CDS
chr10	12035107	12035124	-	0.99	4.531	UPF2	ENSG00000151461.20	CDS
chr5	72196219	72196239	+	0.99	4.529	MAP1B	ENSG00000131711.15	CDS
chr14	73110902	73110919	+	0.98	4.529	RBM25	ENSG00000119707.14	CDS
chr12	103938396	103938399	+	0.97	4.527	HSP90B1	ENSG00000166598.16	CDS
chr14	34800275	34800290	-	0.99	4.525	BAZ1A	ENSG00000198604.11	CDS
chr10	68773032	68773045	+	0.99	4.525	CCAR1	ENSG00000060339.14	CDS
chr12	103947337	103947342	+	0.99	4.525	HSP90B1	ENSG00000166598.16	CDS
chr11	130121783	130121810	+	0.98	4.519	APLP2	ENSG00000084234.18	CDS
chr14	55634595	55634599	+	0.99	4.514	KTN1	ENSG00000126777.18	CDS
chr12	103947413	103947416	+	0.99	4.512	HSP90B1	ENSG00000166598.16	CDS
chr3	143043115	143043120	+	0.98	4.512	U2SURP	ENSG00000163714.18	CDS
chr12	6578866	6578881	-	0.99	4.511	CHD4	ENSG00000111642.16	CDS
chr17	50745912	50745974	+	0.98	4.509	LUC7L3	ENSG00000108848.16	CDS
chr10	68772991	68773032	+	0.99	4.509	CCAR1	ENSG00000060339.14	CDS
chr11	62148739	62148750	+	0.97	4.508	INCENP	ENSG00000149503.13	CDS
chr12	103947350	103947354	+	0.99	4.508	HSP90B1	ENSG00000166598.16	CDS
chr12	103938378	103938384	+	0.99	4.506	HSP90B1	ENSG00000166598.16	CDS
chr12	103947342	103947346	+	0.99	4.506	HSP90B1	ENSG00000166598.16	CDS
chr11	17310950	17310983	+	0.98	4.505	NUCB2	ENSG00000070081.18	CDS
chr5	72196209	72196219	+	0.98	4.502	MAP1B	ENSG00000131711.15	CDS
chr10	119050584	119050670	-	0.99	4.501	EIF3A	ENSG00000107581.13	CDS
chr12	103947354	103947361	+	0.98	4.499	HSP90B1	ENSG00000166598.16	CDS
chr10	119050520	119050560	-	0.99	4.499	EIF3A	ENSG00000107581.13	CDS
chr12	95494059	95494072	+	0.99	4.497	METAP2	ENSG00000111142.14	CDS
chr1	120465313	120465339	+	0.99	4.496	NBPF8	ENSG00000270231.5	CDS
chr11	130121768	130121778	+	0.99	4.496	APLP2	ENSG00000084234.18	CDS
chr14	73109393	73109403	+	0.99	4.493	RBM25	ENSG00000119707.14	CDS
chr6	44250401	44250412	+	0.99	4.492	HSP90AB1	ENSG00000096384.20	CDS
chr2	231460675	231460683	-	0.98	4.49	NCL	ENSG00000115053.17	CDS
chr14	73110919	73110931	+	0.98	4.489	RBM25	ENSG00000119707.14	CDS
chr2	231463211	231463216	-	0.99	4.489	NCL	ENSG00000115053.17	CDS
chr14	102084911	102084916	-	0.99	4.488	HSP90AA1	ENSG00000080824.19	CDS
chr12	103938384	103938393	+	0.99	4.488	HSP90B1	ENSG00000166598.16	CDS
chr6	44250412	44250415	+	0.99	4.487	HSP90AB1	ENSG00000096384.20	CDS
chr15	99259997	99260001	+	0.99	4.485	HSP90B2P	ENSG00000259706.1	ncRNA
chr2	232819857	232819920	+	0.97	4.484	GIGYF2	ENSG00000204120.16	CDS
chr5	72195642	72195732	+	0.99	4.48	MAP1B	ENSG00000131711.15	CDS
chr3	168024526	168024529	-	0.98	4.477	GOLIM4	ENSG00000173905.9	CDS
chr4	77028736	77028758	+	0.97	4.476	SEPTIN11	ENSG00000138758.12	CDS
chr2	231463235	231463242	-	0.99	4.475	NCL	ENSG00000115053.17	CDS
chr5	72196197	72196209	+	0.99	4.474	MAP1B	ENSG00000131711.15	CDS
chr2	231460671	231460675	-	0.96	4.474	NCL	ENSG00000115053.17	CDS
chr20	41081163	41081194	+	0.99	4.473	TOP1	ENSG00000198900.7	CDS
chr12	103947409	103947413	+	0.99	4.473	HSP90B1	ENSG00000166598.16	CDS
chr2	231461966	231462001	-	0.99	4.473	NCL	ENSG00000115053.17	CDS
chr12	103947632	103947634	+	0.98	4.472	HSP90B1	ENSG00000166598.16	CDS
chr10	119056935	119056938	-	0.99	4.471	EIF3A	ENSG00000107581.13	CDS
chr12	103947416	103947427	+	0.99	4.467	HSP90B1	ENSG00000166598.16	CDS
chr17	50746609	50746632	+	0.98	4.465	LUC7L3	ENSG00000108848.16	CDS
chr1	171532398	171532421	+	0.99	4.464	PRRC2C	ENSG00000117523.18	CDS
chr14	73110931	73110942	+	0.99	4.461	RBM25	ENSG00000119707.14	CDS
chr12	103947335	103947337	+	0.99	4.46	HSP90B1	ENSG00000166598.16	CDS
chr5	72195855	72195892	+	0.99	4.459	MAP1B	ENSG00000131711.15	CDS
chr14	102084916	102084919	-	0.98	4.459	HSP90AA1	ENSG00000080824.19	CDS
chr2	231463216	231463230	-	0.99	4.459	NCL	ENSG00000115053.17	CDS
chr14	34800222	34800249	-	0.99	4.456	BAZ1A	ENSG00000198604.11	CDS
chr14	55634599	55634604	+	0.99	4.455	KTN1	ENSG00000126777.18	CDS
chr2	231463203	231463211	-	0.99	4.454	NCL	ENSG00000115053.17	CDS
chr14	102083561	102083604	-	0.99	4.452	HSP90AA1	ENSG00000080824.19	CDS
chr12	6578881	6578913	-	0.98	4.449	CHD4	ENSG00000111642.16	CDS
chr12	103947393	103947405	+	0.99	4.448	HSP90B1	ENSG00000166598.16	CDS
chr17	8512450	8512551	-	0.98	4.447	MYH10	ENSG00000133026.14	CDS
chr2	202303024	202303057	+	0.99	4.447	NOP58	ENSG00000055044.11	CDS
chr14	34800290	34800306	-	0.99	4.446	BAZ1A	ENSG00000198604.11	CDS
chr12	103939530	103939535	+	0.99	4.446	HSP90B1	ENSG00000166598.16	CDS
chr1	150226628	150226650	-	0.98	4.446	ANP32E	ENSG00000143401.15	CDS
chr2	99364351	99364421	+	0.99	4.438	EIF5B	ENSG00000158417.11	CDS
chr12	103946868	103946886	+	0.99	4.438	HSP90B1	ENSG00000166598.16	CDS
chr12	122340936	122341014	-	0.98	4.436	CLIP1	ENSG00000130779.22	CDS
chr12	103947331	103947335	+	0.99	4.435	HSP90B1	ENSG00000166598.16	CDS
chr14	73106251	73106280	+	0.99	4.434	RBM25	ENSG00000119707.14	CDS
chr15	58893888	58893926	-	0.97	4.433	SLTM	ENSG00000137776.17	CDS
chr12	103947328	103947331	+	0.98	4.432	HSP90B1	ENSG00000166598.16	CDS
chr4	4273660	4273669	-	0.99	4.429	LYAR	ENSG00000145220.14	CDS
chr4	77028705	77028736	+	0.99	4.429	SEPTIN11	ENSG00000138758.12	CDS
chr10	12042759	12042805	-	0.99	4.427	UPF2	ENSG00000151461.20	5' UTR
chr5	72196126	72196161	+	0.99	4.427	MAP1B	ENSG00000131711.15	CDS
chr2	99337450	99337464	+	0.99	4.424	EIF5B	ENSG00000158417.11	5' UTR
chr9	98011345	98011356	+	0.98	4.423	ANP32B	ENSG00000136938.9	CDS
chr14	102084908	102084911	-	0.99	4.42	HSP90AA1	ENSG00000080824.19	CDS
chr2	99368536	99368586	+	0.99	4.416	EIF5B	ENSG00000158417.11	CDS
chr20	41077581	41077633	+	0.99	4.415	TOP1	ENSG00000198900.7	CDS
chr12	103947405	103947409	+	0.99	4.414	HSP90B1	ENSG00000166598.16	CDS
chr5	72196171	72196185	+	0.99	4.41	MAP1B	ENSG00000131711.15	CDS
chr1	144423868	144423942	-	0.99	4.41	NBPF15	ENSG00000266338.7	CDS
chr14	73110942	73110950	+	0.99	4.409	RBM25	ENSG00000119707.14	CDS
chr8	97713765	97713769	+	0.99	4.405	MTDH	ENSG00000147649.10	CDS
chr2	231461770	231461791	-	0.98	4.403	NCL	ENSG00000115053.17	CDS
chr12	103946860	103946868	+	0.99	4.402	HSP90B1	ENSG00000166598.16	CDS
chr5	72196161	72196171	+	0.98	4.4	MAP1B	ENSG00000131711.15	CDS
chr15	50481807	50481919	+	0.98	4.399	USP8	ENSG00000138592.14	CDS
chr12	103938369	103938372	+	0.99	4.399	HSP90B1	ENSG00000166598.16	CDS
chr12	103947325	103947328	+	0.99	4.398	HSP90B1	ENSG00000166598.16	CDS
chr1	193138148	193138164	+	0.99	4.398	CDC73	ENSG00000134371.14	CDS
chr17	16126125	16126210	-	0.99	4.397	NCOR1	ENSG00000141027.22	CDS
chr2	99361371	99361418	+	0.99	4.395	EIF5B	ENSG00000158417.11	CDS
chr12	103946886	103946893	+	0.99	4.394	HSP90B1	ENSG00000166598.16	CDS
chrX	136511337	136511392	+	0.98	4.393	HTATSF1	ENSG00000102241.12	CDS
chr14	55634604	55634612	+	0.99	4.39	KTN1	ENSG00000126777.18	CDS
chr14	55634527	55634585	+	0.98	4.388	KTN1	ENSG00000126777.18	CDS
chr5	72195261	72195295	+	0.98	4.388	MAP1B	ENSG00000131711.15	CDS
chr5	160404495	160404557	-	0.99	4.387	SLU7	ENSG00000164609.10	CDS
chr11	27890013	27890091	-	0.99	4.38	HSP90AA2P	ENSG00000224411.3	ncRNA
chr20	41098326	41098341	+	0.99	4.38	TOP1	ENSG00000198900.7	CDS
chr15	64951038	64951077	-	0.98	4.38	ENSG00000274383	ENSG00000274383.1	ncRNA
chr14	73105994	73106022	+	0.98	4.379	RBM25	ENSG00000119707.14	CDS
chr12	103938366	103938369	+	0.98	4.377	HSP90B1	ENSG00000166598.16	CDS
chr5	16702536	16702537	-	0.99	4.374	MYO10	ENSG00000145555.15	Intron
chr2	99376572	99376634	+	0.99	4.373	EIF5B	ENSG00000158417.11	CDS
chr14	21363236	21363275	-	0.98	4.37	SUPT16H	ENSG00000092201.10	CDS
chr14	55634612	55634616	+	0.99	4.37	KTN1	ENSG00000126777.18	CDS
chr3	168027833	168027837	-	0.99	4.369	GOLIM4	ENSG00000173905.9	CDS
chr2	231461712	231461726	-	0.97	4.369	NCL	ENSG00000115053.17	CDS
chr12	103939510	103939530	+	0.99	4.367	HSP90B1	ENSG00000166598.16	CDS
chr12	103947306	103947325	+	0.99	4.359	HSP90B1	ENSG00000166598.16	CDS
chr2	231460683	231460687	-	0.98	4.359	NCL	ENSG00000115053.17	CDS
chr3	168027817	168027833	-	0.99	4.358	GOLIM4	ENSG00000173905.9	CDS
chr12	103938372	103938378	+	0.99	4.357	HSP90B1	ENSG00000166598.16	CDS
chr12	103938339	103938366	+	0.98	4.356	HSP90B1	ENSG00000166598.16	CDS
chr13	106567572	106567575	-	0.99	4.356	ARGLU1	ENSG00000134884.15	CDS
chr1	205720540	205720546	-	0.99	4.356	NUCKS1	ENSG00000069275.13	CDS
chr2	99337484	99337513	+	0.99	4.355	EIF5B	ENSG00000158417.11	5' UTR
chr10	68773045	68773080	+	0.99	4.353	CCAR1	ENSG00000060339.14	CDS
chr1	91643949	91643970	+	0.99	4.353	HSP90B3P	ENSG00000203914.4	ncRNA
chr14	55636501	55636518	+	0.98	4.352	KTN1	ENSG00000126777.18	CDS
chr7	134950375	134950394	+	0.98	4.349	CALD1	ENSG00000122786.20	CDS
chr10	42796686	42796787	+	0.99	4.347	BMS1	ENSG00000165733.8	CDS
chr1	77942104	77942208	+	0.98	4.347	NEXN	ENSG00000162614.19	CDS
chr9	15474144	15474210	-	0.99	4.346	PSIP1	ENSG00000164985.15	CDS
chr15	64951299	64951383	-	0.99	4.345	ENSG00000274383	ENSG00000274383.1	ncRNA
chr2	99368511	99368529	+	0.99	4.344	EIF5B	ENSG00000158417.11	CDS
chr4	13604698	13604775	-	0.99	4.341	BOD1L1	ENSG00000038219.13	CDS
chr14	34800306	34800324	-	0.99	4.341	BAZ1A	ENSG00000198604.11	CDS
chr12	103947361	103947366	+	0.98	4.341	HSP90B1	ENSG00000166598.16	CDS
chr8	67158993	67159007	+	0.99	4.339	CSPP1	ENSG00000104218.16	CDS
chr5	72195574	72195614	+	0.98	4.336	MAP1B	ENSG00000131711.15	CDS
chr3	168029225	168029272	-	0.98	4.336	GOLIM4	ENSG00000173905.9	CDS
chr4	68337082	68337214	-	0.99	4.335	YTHDC1	ENSG00000083896.13	CDS
chr6	44250371	44250381	+	0.99	4.334	HSP90AB1	ENSG00000096384.20	CDS
chr8	67159007	67159071	+	0.99	4.334	CSPP1	ENSG00000104218.16	CDS
chr10	119044087	119044143	-	0.99	4.327	EIF3A	ENSG00000107581.13	CDS
chr6	44250387	44250401	+	0.99	4.326	HSP90AB1	ENSG00000096384.20	CDS
chr17	4672318	4672375	-	0.99	4.325	PELP1	ENSG00000141456.16	CDS
chr4	4274365	4274371	-	0.99	4.324	LYAR	ENSG00000145220.14	CDS
chr2	99368496	99368511	+	0.99	4.324	EIF5B	ENSG00000158417.11	CDS
chr14	102084412	102084462	-	0.99	4.322	HSP90AA1	ENSG00000080824.19	CDS
chr12	103946893	103946897	+	0.99	4.322	HSP90B1	ENSG00000166598.16	CDS
chr11	17310983	17311007	+	0.99	4.32	NUCB2	ENSG00000070081.18	CDS
chrX	53409416	53409450	-	0.99	4.32	SMC1A	ENSG00000072501.19	CDS
chr7	134933258	134933290	+	0.99	4.319	CALD1	ENSG00000122786.20	CDS
chr1	152314540	152314614	-	0.99	4.319	FLG	ENSG00000143631.11	CDS
chr5	163483267	163483270	+	0.97	4.317	HMMR	ENSG00000072571.20	CDS
chr9	136840319	136840346	+	0.98	4.316	RABL6	ENSG00000196642.19	CDS
chr5	150396806	150396846	+	0.98	4.316	TCOF1	ENSG00000070814.22	CDS
chr2	231460687	231460695	-	0.99	4.316	NCL	ENSG00000115053.17	CDS
chr1	77926830	77926893	+	0.98	4.314	NEXN	ENSG00000162614.19	CDS
chr2	231463242	231463249	-	0.99	4.314	NCL	ENSG00000115053.17	CDS
chr5	72195125	72195220	+	0.99	4.313	MAP1B	ENSG00000131711.15	CDS
chr14	55636518	55636526	+	0.99	4.311	KTN1	ENSG00000126777.18	CDS
chr14	73107827	73107849	+	0.99	4.311	RBM25	ENSG00000119707.14	CDS
chr2	231463230	231463235	-	0.98	4.311	NCL	ENSG00000115053.17	CDS
chr4	77028758	77028765	+	0.99	4.31	SEPTIN11	ENSG00000138758.12	CDS
chr11	10774013	10774118	+	0.99	4.308	CTR9	ENSG00000198730.9	CDS
chr10	119049954	119049986	-	0.99	4.308	EIF3A	ENSG00000107581.13	CDS
chr1	205720530	205720540	-	0.99	4.307	NUCKS1	ENSG00000069275.13	CDS
chr14	102085299	102085321	-	0.99	4.305	HSP90AA1	ENSG00000080824.19	CDS
chr1	171532705	171532746	+	0.98	4.304	PRRC2C	ENSG00000117523.18	CDS
chr16	89284236	89284305	-	0.98	4.302	ANKRD11	ENSG00000167522.17	CDS
chr9	113408831	113408905	-	0.99	4.302	POLE3	ENSG00000148229.13	CDS
chr14	102084751	102084760	-	0.98	4.299	HSP90AA1	ENSG00000080824.19	CDS
chr15	56443690	56443807	-	0.99	4.298	MNS1	ENSG00000138587.6	CDS
chr3	168032586	168032632	-	0.99	4.297	GOLIM4	ENSG00000173905.9	CDS
chr17	8509810	8509858	-	0.99	4.296	MYH10	ENSG00000133026.14	CDS
chr1	171532421	171532445	+	0.99	4.296	PRRC2C	ENSG00000117523.18	CDS
chr6	44250469	44250473	+	0.98	4.295	HSP90AB1	ENSG00000096384.20	CDS
chr12	103946911	103946919	+	0.98	4.294	HSP90B1	ENSG00000166598.16	CDS
chr14	102084765	102084770	-	0.97	4.292	HSP90AA1	ENSG00000080824.19	CDS
chr7	134941090	134941124	+	0.99	4.291	CALD1	ENSG00000122786.20	CDS
chr1	120465255	120465313	+	0.99	4.29	NBPF8	ENSG00000270231.5	CDS
chr2	231461645	231461651	-	0.98	4.29	NCL	ENSG00000115053.17	CDS
chr7	23522193	23522273	-	0.99	4.289	TRA2A	ENSG00000164548.12	5' UTR
chr14	102084885	102084908	-	0.99	4.289	HSP90AA1	ENSG00000080824.19	CDS
chr14	55634616	55634624	+	0.99	4.288	KTN1	ENSG00000126777.18	CDS
chr2	99361760	99361820	+	0.99	4.288	EIF5B	ENSG00000158417.11	CDS
chr2	99361418	99361465	+	0.99	4.287	EIF5B	ENSG00000158417.11	CDS
chr10	119051199	119051246	-	0.99	4.287	EIF3A	ENSG00000107581.13	CDS
chr3	37315508	37315582	+	0.99	4.286	GOLGA4	ENSG00000144674.18	CDS
chr14	102084760	102084765	-	0.99	4.283	HSP90AA1	ENSG00000080824.19	CDS
chrX	136511263	136511300	+	0.99	4.283	HTATSF1	ENSG00000102241.12	CDS
chr12	103946921	103946931	+	0.99	4.281	HSP90B1	ENSG00000166598.16	CDS
chr12	103946919	103946921	+	0.97	4.278	HSP90B1	ENSG00000166598.16	CDS
chr12	103947386	103947393	+	0.99	4.278	HSP90B1	ENSG00000166598.16	CDS
chr8	123370967	123370987	-	0.99	4.277	ATAD2	ENSG00000156802.13	CDS
chr7	134950370	134950375	+	0.98	4.277	CALD1	ENSG00000122786.20	CDS
chr1	205720546	205720583	-	0.99	4.277	NUCKS1	ENSG00000069275.13	CDS
chr2	231461791	231461801	-	0.99	4.276	NCL	ENSG00000115053.17	CDS
chr2	231461863	231461882	-	0.98	4.276	NCL	ENSG00000115053.17	CDS
chrX	119932103	119932216	-	0.96	4.274	NKAP	ENSG00000101882.10	CDS
chr10	119049943	119049948	-	0.99	4.273	EIF3A	ENSG00000107581.13	CDS
chr17	4672190	4672203	-	0.99	4.27	PELP1	ENSG00000141456.16	CDS
chr17	50745821	50745847	+	0.99	4.27	LUC7L3	ENSG00000108848.16	CDS
chr1	171532595	171532628	+	0.99	4.27	PRRC2C	ENSG00000117523.18	CDS
chr14	73110864	73110888	+	0.99	4.269	RBM25	ENSG00000119707.14	CDS
chr10	119044056	119044070	-	0.98	4.269	EIF3A	ENSG00000107581.13	CDS
chr9	15472647	15472670	-	0.98	4.268	PSIP1	ENSG00000164985.15	CDS
chr14	21363132	21363149	-	0.99	4.268	SUPT16H	ENSG00000092201.10	CDS
chr6	44250551	44250558	+	0.99	4.266	HSP90AB1	ENSG00000096384.20	CDS
chr5	72195837	72195855	+	0.99	4.265	MAP1B	ENSG00000131711.15	CDS
chr12	103946897	103946911	+	0.98	4.265	HSP90B1	ENSG00000166598.16	CDS
chr12	103947379	103947386	+	0.99	4.264	HSP90B1	ENSG00000166598.16	CDS
chr17	50744802	50744807	+	0.99	4.263	LUC7L3	ENSG00000108848.16	CDS
chr1	237603147	237603218	+	0.98	4.261	RYR2	ENSG00000198626.18	Intron
chr17	50743720	50743744	+	0.98	4.26	LUC7L3	ENSG00000108848.16	CDS
chr14	55634624	55634634	+	0.99	4.26	KTN1	ENSG00000126777.18	CDS
chr17	4672203	4672215	-	0.98	4.259	PELP1	ENSG00000141456.16	CDS
chr14	73107825	73107827	+	0.99	4.259	RBM25	ENSG00000119707.14	CDS
chr2	231461651	231461712	-	0.99	4.259	NCL	ENSG00000115053.17	CDS
chr17	50743744	50743770	+	0.99	4.256	LUC7L3	ENSG00000108848.16	CDS
chr8	67158990	67158993	+	0.97	4.255	CSPP1	ENSG00000104218.16	CDS
chr2	231460290	231460293	-	0.99	4.255	NCL	ENSG00000115053.17	CDS
chr20	41084463	41084487	+	0.98	4.251	TOP1	ENSG00000198900.7	CDS
chr14	102085377	102085391	-	0.99	4.25	HSP90AA1	ENSG00000080824.19	CDS
chr12	103946931	103946938	+	0.98	4.248	HSP90B1	ENSG00000166598.16	CDS
chr6	44250381	44250387	+	0.98	4.247	HSP90AB1	ENSG00000096384.20	CDS
chr8	123370955	123370967	-	0.99	4.247	ATAD2	ENSG00000156802.13	CDS
chr10	119044053	119044056	-	0.99	4.244	EIF3A	ENSG00000107581.13	CDS
chr1	235229230	235229248	-	0.98	4.243	ARID4B	ENSG00000054267.22	CDS
chr20	49242593	49242620	+	0.98	4.242	DDX27	ENSG00000124228.15	CDS
chr2	99337513	99337578	+	0.98	4.241	EIF5B	ENSG00000158417.11	CDS
chr10	119044070	119044087	-	0.99	4.241	EIF3A	ENSG00000107581.13	CDS
chr12	95483241	95483270	+	0.97	4.239	METAP2	ENSG00000111142.14	CDS
chr10	68786134	68786147	+	0.99	4.237	CCAR1	ENSG00000060339.14	CDS
chr3	143043120	143043133	+	0.98	4.237	U2SURP	ENSG00000163714.18	CDS
chr15	56434290	56434357	-	0.97	4.234	MNS1	ENSG00000138587.6	CDS
chr17	4672215	4672234	-	0.98	4.232	PELP1	ENSG00000141456.16	CDS
chr16	89282811	89282851	-	0.99	4.23	ANKRD11	ENSG00000167522.17	CDS
chr5	25910541	25910629	+	0.99	4.228	MSNP1	ENSG00000251593.1	ncRNA
chr12	103947370	103947379	+	0.99	4.225	HSP90B1	ENSG00000166598.16	CDS
chr3	169982781	169982817	+	0.98	4.222	SEC62	ENSG00000008952.17	CDS
chr17	50743770	50743779	+	0.98	4.22	LUC7L3	ENSG00000108848.16	CDS
chr2	101856010	101856053	+	0.98	4.219	MAP4K4	ENSG00000071054.17	CDS
chr14	102085785	102085805	-	0.99	4.219	HSP90AA1	ENSG00000080824.19	CDS
chr3	168024541	168024564	-	0.98	4.219	GOLIM4	ENSG00000173905.9	CDS
chr8	67158458	67158515	+	0.98	4.217	CSPP1	ENSG00000104218.16	CDS
chr14	102085805	102085812	-	0.99	4.215	HSP90AA1	ENSG00000080824.19	CDS
chr12	103946938	103946943	+	0.98	4.212	HSP90B1	ENSG00000166598.16	CDS
chr7	134950394	134950412	+	0.99	4.211	CALD1	ENSG00000122786.20	CDS
chr12	103947366	103947370	+	0.99	4.21	HSP90B1	ENSG00000166598.16	CDS
chrX	53412917	53412980	-	0.99	4.209	SMC1A	ENSG00000072501.19	CDS
chr11	130121762	130121768	+	0.99	4.208	APLP2	ENSG00000084234.18	CDS
chr10	68773080	68773095	+	0.97	4.207	CCAR1	ENSG00000060339.14	CDS
chr9	15055400	15055456	+	0.99	4.205	PSIP1P1	ENSG00000234297.2	ncRNA
chr11	27890493	27890549	-	0.98	4.205	HSP90AA2P	ENSG00000224411.3	ncRNA
chr2	231460695	231460698	-	0.99	4.202	NCL	ENSG00000115053.17	CDS
chr6	52267905	52267974	-	0.99	4.2	MCM3	ENSG00000112118.20	CDS
chr5	72196239	72196278	+	0.99	4.198	MAP1B	ENSG00000131711.15	CDS
chr6	44250527	44250529	+	0.99	4.197	HSP90AB1	ENSG00000096384.20	CDS
chr10	119051246	119051321	-	0.98	4.197	EIF3A	ENSG00000107581.13	CDS
chr2	231460863	231460867	-	0.98	4.197	NCL	ENSG00000115053.17	CDS
chr1	150220679	150220737	-	0.98	4.196	ANP32E	ENSG00000143401.15	CDS
chr6	44250536	44250551	+	0.99	4.195	HSP90AB1	ENSG00000096384.20	CDS
chr2	231463249	231463260	-	0.99	4.193	NCL	ENSG00000115053.17	CDS
chr2	71134023	71134106	+	0.99	4.192	MPHOSPH10	ENSG00000124383.11	CDS
chr2	231461541	231461546	-	0.99	4.191	NCL	ENSG00000115053.17	CDS
chr1	150226607	150226628	-	0.99	4.189	ANP32E	ENSG00000143401.15	CDS
chr2	231461539	231461541	-	0.98	4.188	NCL	ENSG00000115053.17	CDS
chrX	136510175	136510194	+	0.97	4.187	HTATSF1	ENSG00000102241.12	CDS
chr8	123370924	123370955	-	0.97	4.185	ATAD2	ENSG00000156802.13	CDS
chr2	232832947	232832971	+	0.98	4.185	GIGYF2	ENSG00000204120.16	CDS
chr8	127898255	127898348	+	0.98	4.184	PVT1	ENSG00000249859.14	ncRNA
chr2	231712441	231712507	+	0.99	4.183	PTMA	ENSG00000187514.17	CDS
chr15	56456474	56456515	-	0.99	4.182	MNS1	ENSG00000138587.6	CDS
chr17	8509858	8509870	-	0.98	4.181	MYH10	ENSG00000133026.14	CDS
chr10	119042726	119042772	-	0.98	4.18	EIF3A	ENSG00000107581.13	CDS
chr3	168010343	168010416	-	0.98	4.179	GOLIM4	ENSG00000173905.9	CDS
chr1	77929451	77929479	+	0.99	4.175	NEXN	ENSG00000162614.19	CDS
chr8	123371291	123371298	-	0.97	4.175	ATAD2	ENSG00000156802.13	CDS
chr6	44250529	44250536	+	0.99	4.174	HSP90AB1	ENSG00000096384.20	CDS
chr14	55636497	55636501	+	0.99	4.174	KTN1	ENSG00000126777.18	CDS
chr17	40395449	40395538	-	0.99	4.173	TOP2A	ENSG00000131747.15	CDS
chr6	44250509	44250527	+	0.99	4.173	HSP90AB1	ENSG00000096384.20	CDS
chr6	44250368	44250371	+	0.98	4.172	HSP90AB1	ENSG00000096384.20	CDS
chr5	72195027	72195084	+	0.99	4.17	MAP1B	ENSG00000131711.15	CDS
chr17	50743779	50743791	+	0.98	4.169	LUC7L3	ENSG00000108848.16	CDS
chr12	95474309	95474326	+	0.99	4.169	METAP2	ENSG00000111142.14	CDS
chr2	232816890	232816913	+	0.97	4.169	GIGYF2	ENSG00000204120.16	CDS
chr10	68786147	68786162	+	0.97	4.168	CCAR1	ENSG00000060339.14	CDS
chr6	44250478	44250509	+	0.98	4.165	HSP90AB1	ENSG00000096384.20	CDS
chr15	57453681	57453712	+	0.99	4.164	CGNL1	ENSG00000128849.11	CDS
chr2	99361635	99361652	+	0.98	4.163	EIF5B	ENSG00000158417.11	CDS
chr20	34105446	34105493	-	0.99	4.16	EIF2S2	ENSG00000125977.7	CDS
chr14	102083122	102083125	-	0.99	4.157	HSP90AA1	ENSG00000080824.19	CDS
chr9	15474083	15474101	-	0.99	4.156	PSIP1	ENSG00000164985.15	CDS
chr2	24271840	24271941	-	0.99	4.156	ITSN2	ENSG00000198399.16	CDS
chr14	55633325	55633341	+	0.98	4.155	KTN1	ENSG00000126777.18	CDS
chr14	73106022	73106081	+	0.99	4.154	RBM25	ENSG00000119707.14	CDS
chr14	55633293	55633325	+	0.98	4.152	KTN1	ENSG00000126777.18	CDS
chr5	72196103	72196126	+	0.98	4.152	MAP1B	ENSG00000131711.15	CDS
chr12	79797320	79797386	-	0.98	4.152	PPP1R12A	ENSG00000058272.19	CDS
chr1	171532668	171532705	+	0.99	4.152	PRRC2C	ENSG00000117523.18	CDS
chr2	232832854	232832874	+	0.99	4.152	GIGYF2	ENSG00000204120.16	CDS
chr10	68772987	68772991	+	0.98	4.151	CCAR1	ENSG00000060339.14	CDS
chr15	99260001	99260028	+	0.98	4.151	HSP90B2P	ENSG00000259706.1	ncRNA
chr10	14521866	14521925	-	0.99	4.148	FAM107B	ENSG00000065809.14	CDS
chr1	77942460	77942547	+	0.99	4.148	NEXN	ENSG00000162614.19	CDS
chrX	53411993	53411996	-	0.98	4.146	SMC1A	ENSG00000072501.19	CDS
chrX	77663415	77663483	-	0.98	4.146	ATRX	ENSG00000085224.23	CDS
chr1	91642762	91642797	+	0.99	4.146	HSP90B3P	ENSG00000203914.4	ncRNA
chrX	136511300	136511337	+	0.99	4.146	HTATSF1	ENSG00000102241.12	CDS
chr1	235220304	235220420	-	0.99	4.146	ARID4B	ENSG00000054267.22	CDS
chr17	8508583	8508615	-	0.99	4.143	MYH10	ENSG00000133026.14	CDS
chr2	99376410	99376430	+	0.99	4.143	EIF5B	ENSG00000158417.11	CDS
chr1	171532628	171532668	+	0.99	4.143	PRRC2C	ENSG00000117523.18	CDS
chr2	231460810	231460863	-	0.99	4.143	NCL	ENSG00000115053.17	CDS
chr14	102083104	102083108	-	0.98	4.142	HSP90AA1	ENSG00000080824.19	CDS
chr7	134947644	134947718	+	0.98	4.138	CALD1	ENSG00000122786.20	CDS
chr5	72195235	72195261	+	0.99	4.137	MAP1B	ENSG00000131711.15	CDS
chr2	152673628	152673706	-	0.98	4.137	PRPF40A	ENSG00000196504.21	CDS
chr4	4273630	4273660	-	0.99	4.136	LYAR	ENSG00000145220.14	CDS
chr8	19361267	19361319	+	0.99	4.136	SH2D4A	ENSG00000104611.12	CDS
chr14	102083108	102083122	-	0.99	4.136	HSP90AA1	ENSG00000080824.19	CDS
chr9	113408905	113408983	-	0.98	4.136	POLE3	ENSG00000148229.13	CDS
chr17	50743791	50743807	+	0.98	4.135	LUC7L3	ENSG00000108848.16	CDS
chr14	102083128	102083132	-	0.98	4.135	HSP90AA1	ENSG00000080824.19	CDS
chr1	205720521	205720530	-	0.98	4.135	NUCKS1	ENSG00000069275.13	CDS
chr9	35685491	35685517	-	0.99	4.134	TPM2	ENSG00000198467.16	CDS
chr1	24649970	24650086	+	0.99	4.133	SRRM1	ENSG00000133226.18	CDS
chr16	60024622	60024680	-	0.99	4.132	ENSG00000261278	ENSG00000261278.1	ncRNA
chr2	99368529	99368536	+	0.99	4.132	EIF5B	ENSG00000158417.11	CDS
chr9	35685480	35685491	-	0.99	4.131	TPM2	ENSG00000198467.16	CDS
chr15	56443653	56443690	-	0.99	4.129	MNS1	ENSG00000138587.6	CDS
chr1	70250608	70250670	+	0.98	4.129	SRSF11	ENSG00000116754.14	CDS
chr14	102083125	102083128	-	0.99	4.125	HSP90AA1	ENSG00000080824.19	CDS
chrX	53409450	53409481	-	0.98	4.124	SMC1A	ENSG00000072501.19	CDS
chr10	119049948	119049954	-	0.99	4.124	EIF3A	ENSG00000107581.13	CDS
chr5	72195093	72195125	+	0.97	4.123	MAP1B	ENSG00000131711.15	CDS
chr9	15472630	15472634	-	0.99	4.12	PSIP1	ENSG00000164985.15	CDS
chr14	34800324	34800387	-	0.99	4.119	BAZ1A	ENSG00000198604.11	CDS
chr14	55612536	55612567	+	0.99	4.118	KTN1	ENSG00000126777.18	CDS
chr4	112647243	112647291	+	0.99	4.117	LARP7	ENSG00000174720.18	CDS
chr1	171532513	171532516	+	0.99	4.116	PRRC2C	ENSG00000117523.18	CDS
chr7	23522333	23522438	-	0.99	4.115	TRA2A	ENSG00000164548.12	5' UTR
chr3	37315582	37315598	+	0.99	4.115	GOLGA4	ENSG00000144674.18	CDS
chr15	43814963	43815071	-	0.99	4.115	MFAP1	ENSG00000140259.7	CDS
chr8	123369866	123369933	-	0.99	4.115	ATAD2	ENSG00000156802.13	CDS
chr15	44551431	44551519	+	0.98	4.114	EIF3J	ENSG00000104131.13	CDS
chr1	77933372	77933439	+	0.99	4.114	NEXN	ENSG00000162614.19	CDS
chr6	151349652	151349680	+	0.98	4.114	AKAP12	ENSG00000131016.17	CDS
chr17	4672234	4672254	-	0.99	4.11	PELP1	ENSG00000141456.16	CDS
chr19	10166611	10166686	-	0.98	4.11	DNMT1	ENSG00000130816.17	CDS
chr1	214619128	214619152	+	0.99	4.11	CENPF	ENSG00000117724.14	CDS
chr2	231460698	231460728	-	0.98	4.11	NCL	ENSG00000115053.17	CDS
chr2	231461546	231461565	-	0.96	4.11	NCL	ENSG00000115053.17	CDS
chr6	44250353	44250368	+	0.98	4.107	HSP90AB1	ENSG00000096384.20	CDS
chr20	31798446	31798456	+	0.98	4.102	TPX2	ENSG00000088325.16	CDS
chr8	123371237	123371263	-	0.98	4.102	ATAD2	ENSG00000156802.13	CDS
chr17	40628990	40628993	-	0.98	4.101	SMARCE1	ENSG00000073584.20	CDS
chrX	53412159	53412254	-	0.98	4.1	SMC1A	ENSG00000072501.19	CDS
chr14	73110950	73110975	+	0.99	4.1	RBM25	ENSG00000119707.14	CDS
chr9	98015363	98015394	+	0.98	4.1	ANP32B	ENSG00000136938.9	CDS
chr11	130121758	130121762	+	0.98	4.1	APLP2	ENSG00000084234.18	CDS
chr10	42797164	42797184	+	0.99	4.099	BMS1	ENSG00000165733.8	CDS
chr3	160101068	160101155	+	0.99	4.098	BRD7P2	ENSG00000184100.6	ncRNA
chr6	44250473	44250478	+	0.98	4.097	HSP90AB1	ENSG00000096384.20	CDS
chr9	98011339	98011345	+	0.98	4.097	ANP32B	ENSG00000136938.9	CDS
chr10	119049875	119049938	-	0.98	4.097	EIF3A	ENSG00000107581.13	CDS
chr9	2123811	2123937	+	0.98	4.096	SMARCA2	ENSG00000080503.24	CDS
chr1	70250670	70250707	+	0.98	4.096	SRSF11	ENSG00000116754.14	CDS
chr15	56464972	56464986	-	0.98	4.095	MNS1	ENSG00000138587.6	5' UTR
chrX	119837760	119837859	-	0.98	4.095	UPF3B	ENSG00000125351.14	CDS
chr1	77929315	77929349	+	0.98	4.094	NEXN	ENSG00000162614.19	CDS
chr7	10982614	10982720	+	0.99	4.093	PHF14	ENSG00000106443.17	CDS
chr3	168027733	168027817	-	0.99	4.092	GOLIM4	ENSG00000173905.9	CDS
chr14	102085391	102085428	-	0.98	4.09	HSP90AA1	ENSG00000080824.19	CDS
chr12	103937785	103937803	+	0.99	4.09	HSP90B1	ENSG00000166598.16	CDS
chr11	130122406	130122412	+	0.99	4.089	APLP2	ENSG00000084234.18	CDS
chr14	55636526	55636537	+	0.98	4.088	KTN1	ENSG00000126777.18	CDS
chr17	50746541	50746609	+	0.98	4.087	LUC7L3	ENSG00000108848.16	CDS
chr8	123369844	123369866	-	0.98	4.087	ATAD2	ENSG00000156802.13	CDS
chr10	68771350	68771445	+	0.99	4.086	CCAR1	ENSG00000060339.14	CDS
chr1	70250443	70250503	+	0.99	4.084	SRSF11	ENSG00000116754.14	CDS
chr6	78982883	78982972	-	0.99	4.084	PHIP	ENSG00000146247.15	CDS
chr8	94529138	94529170	-	0.99	4.084	VIRMA	ENSG00000164944.12	CDS
chr8	123370920	123370924	-	0.98	4.084	ATAD2	ENSG00000156802.13	CDS
chrX	53409171	53409233	-	0.99	4.083	SMC1A	ENSG00000072501.19	CDS
chr12	79820898	79820930	-	0.99	4.083	PPP1R12A	ENSG00000058272.19	CDS
chr6	7580909	7581029	+	0.97	4.082	DSP	ENSG00000096696.15	CDS
chr6	44250348	44250353	+	0.99	4.082	HSP90AB1	ENSG00000096384.20	CDS
chr6	44252195	44252199	+	0.98	4.081	HSP90AB1	ENSG00000096384.20	CDS
chr11	126067948	126068019	+	0.99	4.081	NAP1L1P1	ENSG00000254759.1	ncRNA
chr1	66958057	66958060	+	0.98	4.08	MIER1	ENSG00000198160.15	CDS
chr1	91643040	91643065	+	0.98	4.08	HSP90B3P	ENSG00000203914.4	ncRNA
chr14	21363278	21363317	-	0.96	4.079	SUPT16H	ENSG00000092201.10	CDS
chr9	98015423	98015470	+	0.99	4.079	ANP32B	ENSG00000136938.9	CDS
chrX	119934489	119934543	-	0.99	4.079	NKAP	ENSG00000101882.10	CDS
chr1	35739431	35739469	-	0.99	4.077	CLSPN	ENSG00000092853.14	CDS
chr1	205718389	205718422	-	0.97	4.077	NUCKS1	ENSG00000069275.13	CDS
chr17	40628960	40628990	-	0.98	4.076	SMARCE1	ENSG00000073584.20	CDS
chr14	102083132	102083136	-	0.98	4.074	HSP90AA1	ENSG00000080824.19	CDS
chr14	102085812	102085848	-	0.99	4.073	HSP90AA1	ENSG00000080824.19	CDS
chr12	79797216	79797283	-	0.98	4.072	PPP1R12A	ENSG00000058272.19	CDS
chr6	130956220	130956279	-	0.99	4.072	EPB41L2	ENSG00000079819.19	CDS
chr1	214614831	214614857	+	0.98	4.072	CENPF	ENSG00000117724.14	CDS
chr4	189473445	189473492	+	0.99	4.071	HSP90AA4P	ENSG00000205100.2	ncRNA
chr2	232844134	232844198	+	0.99	4.071	GIGYF2	ENSG00000204120.16	CDS
chr14	21353487	21353490	-	0.99	4.07	SUPT16H	ENSG00000092201.10	CDS
chr12	103947634	103947662	+	0.98	4.07	HSP90B1	ENSG00000166598.16	CDS
chr10	119056829	119056852	-	0.97	4.07	EIF3A	ENSG00000107581.13	CDS
chr3	168010816	168010823	-	0.99	4.07	GOLIM4	ENSG00000173905.9	CDS
chr1	150226650	150226721	-	0.99	4.069	ANP32E	ENSG00000143401.15	CDS
chr9	15474127	15474144	-	0.97	4.067	PSIP1	ENSG00000164985.15	CDS
chr10	93517075	93517180	+	0.98	4.067	CEP55	ENSG00000138180.16	CDS
chr4	4274424	4274489	-	0.99	4.066	LYAR	ENSG00000145220.14	CDS
chr16	11839894	11839940	-	0.99	4.066	RSL1D1	ENSG00000171490.13	CDS
chr20	41084460	41084463	+	0.98	4.066	TOP1	ENSG00000198900.7	CDS
chr9	15472634	15472647	-	0.99	4.065	PSIP1	ENSG00000164985.15	CDS
chr11	17311007	17311016	+	0.99	4.065	NUCB2	ENSG00000070081.18	CDS
chr14	21363077	21363120	-	0.96	4.065	SUPT16H	ENSG00000092201.10	CDS
chr14	102085761	102085785	-	0.99	4.065	HSP90AA1	ENSG00000080824.19	CDS
chr7	10982543	10982614	+	0.99	4.063	PHF14	ENSG00000106443.17	CDS
chr1	235182465	235182615	-	0.99	4.063	ARID4B	ENSG00000054267.22	CDS
chr15	41464840	41464886	+	0.99	4.059	RTF1	ENSG00000137815.15	CDS
chr19	10182041	10182072	-	0.99	4.058	DNMT1	ENSG00000130816.17	CDS
chr12	95483208	95483241	+	0.99	4.058	METAP2	ENSG00000111142.14	CDS
chrX	53412991	53413015	-	0.99	4.056	SMC1A	ENSG00000072501.19	CDS
chr14	73110849	73110864	+	0.98	4.056	RBM25	ENSG00000119707.14	CDS
chr11	27889510	27889537	-	0.98	4.055	HSP90AA2P	ENSG00000224411.3	ncRNA
chr2	99368586	99368591	+	0.98	4.055	EIF5B	ENSG00000158417.11	CDS
chr11	27889537	27889563	-	0.99	4.054	HSP90AA2P	ENSG00000224411.3	ncRNA
chr3	168024976	168024983	-	0.99	4.054	GOLIM4	ENSG00000173905.9	CDS
chr12	6578847	6578866	-	0.99	4.052	CHD4	ENSG00000111642.16	CDS
chr12	95474216	95474309	+	0.99	4.052	METAP2	ENSG00000111142.14	CDS
chr4	189473492	189473506	+	0.99	4.052	HSP90AA4P	ENSG00000205100.2	ncRNA
chr7	23522276	23522333	-	0.99	4.051	TRA2A	ENSG00000164548.12	5' UTR
chr14	102083136	102083141	-	0.99	4.049	HSP90AA1	ENSG00000080824.19	CDS
chr20	31793976	31794003	+	0.99	4.048	TPX2	ENSG00000088325.16	CDS
chr8	97719047	97719051	+	0.99	4.047	MTDH	ENSG00000147649.10	CDS
chrX	136511173	136511263	+	0.98	4.045	HTATSF1	ENSG00000102241.12	CDS
chr3	169982827	169982888	+	0.99	4.045	SEC62	ENSG00000008952.17	CDS
chr11	108841339	108841420	+	0.99	4.044	DDX10	ENSG00000178105.12	CDS
chr2	232819825	232819857	+	0.98	4.044	GIGYF2	ENSG00000204120.16	CDS
chr12	103946819	103946860	+	0.98	4.043	HSP90B1	ENSG00000166598.16	CDS
chr5	150398352	150398357	+	0.99	4.043	TCOF1	ENSG00000070814.22	CDS
chr1	214619152	214619180	+	0.98	4.043	CENPF	ENSG00000117724.14	CDS
chrX	81118431	81118459	-	0.98	4.042	HMGN5	ENSG00000198157.11	CDS
chr15	44554552	44554601	+	0.98	4.041	EIF3J	ENSG00000104131.13	CDS
chr17	50745722	50745748	+	0.99	4.041	LUC7L3	ENSG00000108848.16	CDS
chr1	91643065	91643096	+	0.99	4.041	HSP90B3P	ENSG00000203914.4	ncRNA
chr12	103937803	103937806	+	0.99	4.041	HSP90B1	ENSG00000166598.16	CDS
chr2	231461957	231461966	-	0.99	4.04	NCL	ENSG00000115053.17	CDS
chr1	152314184	152314244	-	0.99	4.039	FLG	ENSG00000143631.11	CDS
chr2	231461607	231461645	-	0.99	4.038	NCL	ENSG00000115053.17	CDS
chr12	122328262	122328290	-	0.98	4.037	CLIP1	ENSG00000130779.22	CDS
chr1	193122273	193122334	+	0.99	4.037	CDC73	ENSG00000134371.14	CDS
chr2	231463260	231463265	-	0.99	4.037	NCL	ENSG00000115053.17	CDS
chr10	119042703	119042717	-	0.99	4.036	EIF3A	ENSG00000107581.13	CDS
chr11	130122412	130122421	+	0.97	4.036	APLP2	ENSG00000084234.18	CDS
chr20	34105432	34105446	-	0.98	4.035	EIF2S2	ENSG00000125977.7	CDS
chr14	21363120	21363132	-	0.98	4.034	SUPT16H	ENSG00000092201.10	CDS
chr2	99337418	99337450	+	0.99	4.034	EIF5B	ENSG00000158417.11	5' UTR
chr14	21353490	21353502	-	0.98	4.033	SUPT16H	ENSG00000092201.10	CDS
chr5	34941125	34941162	+	0.97	4.032	DNAJC21	ENSG00000168724.18	CDS
chr10	68765889	68765903	+	0.98	4.032	CCAR1	ENSG00000060339.14	CDS
chr8	123371263	123371281	-	0.99	4.032	ATAD2	ENSG00000156802.13	CDS
chr15	58893853	58893888	-	0.99	4.031	SLTM	ENSG00000137776.17	CDS
chrX	77656556	77656659	-	0.99	4.031	ATRX	ENSG00000085224.23	CDS
chr14	102083141	102083149	-	0.99	4.031	HSP90AA1	ENSG00000080824.19	CDS
chr15	64951212	64951217	-	0.99	4.03	ENSG00000274383	ENSG00000274383.1	ncRNA
chr10	119056739	119056769	-	0.98	4.03	EIF3A	ENSG00000107581.13	CDS
chr2	99337464	99337484	+	0.99	4.028	EIF5B	ENSG00000158417.11	5' UTR
chr20	41092463	41092476	+	0.99	4.027	TOP1	ENSG00000198900.7	CDS
chr2	170751825	170751857	+	0.99	4.027	EIF2S2P4	ENSG00000128692.8	ncRNA
chr4	13613508	13613519	-	0.97	4.026	BOD1L1	ENSG00000038219.13	CDS
chr2	127503428	127503523	-	0.99	4.026	IWS1	ENSG00000163166.15	CDS
chr8	94529170	94529188	-	0.99	4.023	VIRMA	ENSG00000164944.12	CDS
chr1	152314355	152314491	-	0.99	4.023	FLG	ENSG00000143631.11	CDS
chr9	35685470	35685480	-	0.98	4.022	TPM2	ENSG00000198467.16	CDS
chr15	56443434	56443480	-	0.99	4.021	MNS1	ENSG00000138587.6	CDS
chr15	41466147	41466221	+	0.99	4.019	RTF1	ENSG00000137815.15	CDS
chr17	50745974	50746000	+	0.99	4.019	LUC7L3	ENSG00000108848.16	CDS
chr14	55634634	55634655	+	0.98	4.019	KTN1	ENSG00000126777.18	CDS
chr5	72196065	72196103	+	0.98	4.019	MAP1B	ENSG00000131711.15	CDS
chr1	153662459	153662477	-	0.99	4.019	ILF2	ENSG00000143621.17	CDS
chr1	205720500	205720521	-	0.99	4.018	NUCKS1	ENSG00000069275.13	CDS
chr1	171532498	171532513	+	0.99	4.017	PRRC2C	ENSG00000117523.18	CDS
chr7	134947559	134947644	+	0.99	4.015	CALD1	ENSG00000122786.20	CDS
chr3	37319168	37319193	+	0.98	4.014	GOLGA4	ENSG00000144674.18	CDS
chr12	95476070	95476091	+	0.97	4.013	METAP2	ENSG00000111142.14	CDS
chr3	168032775	168032850	-	0.97	4.013	GOLIM4	ENSG00000173905.9	CDS
chr7	134928827	134928877	+	0.99	4.012	CALD1	ENSG00000122786.20	CDS
chr20	41533226	41533303	-	0.98	4.011	CHD6	ENSG00000124177.16	CDS
chr1	171532374	171532398	+	0.98	4.01	PRRC2C	ENSG00000117523.18	CDS
chr6	44250558	44250561	+	0.98	4.009	HSP90AB1	ENSG00000096384.20	CDS
chr10	104001450	104001518	+	0.99	4.009	SLK	ENSG00000065613.15	CDS
chr2	231463265	231463275	-	0.99	4.008	NCL	ENSG00000115053.17	CDS
chr6	75891225	75891274	+	0.98	4.006	MYO6	ENSG00000196586.17	CDS
chr14	102083087	102083104	-	0.98	4.006	HSP90AA1	ENSG00000080824.19	CDS
chr12	6770201	6770214	+	0.98	4.004	PTMS	ENSG00000159335.18	CDS
chr10	12035420	12035437	-	0.99	4.004	UPF2	ENSG00000151461.20	CDS
chr3	37315450	37315508	+	0.99	4.004	GOLGA4	ENSG00000144674.18	CDS
chr17	50746000	50746003	+	0.99	4.004	LUC7L3	ENSG00000108848.16	CDS
chr14	92014343	92014384	-	0.99	4.004	TRIP11	ENSG00000100815.12	CDS
chr2	99368493	99368496	+	0.99	4.003	EIF5B	ENSG00000158417.11	CDS
chr2	99369393	99369453	+	0.99	4.003	EIF5B	ENSG00000158417.11	CDS
chr13	106559613	106559634	-	0.99	4.002	ARGLU1	ENSG00000134884.15	CDS
chr17	50743807	50743813	+	0.98	4	LUC7L3	ENSG00000108848.16	CDS
chr10	93517231	93517250	+	0.99	4	CEP55	ENSG00000138180.16	CDS
chr12	95494091	95494138	+	0.98	3.999	METAP2	ENSG00000111142.14	CDS
chr10	119042717	119042726	-	0.99	3.999	EIF3A	ENSG00000107581.13	CDS
chr5	163483283	163483294	+	0.99	3.999	HMMR	ENSG00000072571.20	CDS
chr3	168032685	168032749	-	0.98	3.999	GOLIM4	ENSG00000173905.9	CDS
chrX	97072937	97073010	+	0.98	3.998	DIAPH2	ENSG00000147202.19	CDS
chr10	32028465	32028497	-	0.97	3.997	KIF5B	ENSG00000170759.11	CDS
chr2	159382762	159382804	-	0.98	3.997	BAZ2B	ENSG00000123636.19	CDS
chr1	93875650	93875713	-	0.99	3.996	DNTTIP2	ENSG00000067334.14	CDS
chr14	35079018	35079025	+	0.99	3.995	FAM177A1	ENSG00000151327.14	CDS
chr10	68773095	68773100	+	0.99	3.994	CCAR1	ENSG00000060339.14	CDS
chr12	95494072	95494091	+	0.98	3.994	METAP2	ENSG00000111142.14	CDS
chr2	101855985	101856010	+	0.98	3.994	MAP4K4	ENSG00000071054.17	CDS
chr14	102085297	102085299	-	0.98	3.994	HSP90AA1	ENSG00000080824.19	CDS
chr5	160407477	160407535	-	0.99	3.994	SLU7	ENSG00000164609.10	CDS
chr6	44250344	44250348	+	0.99	3.992	HSP90AB1	ENSG00000096384.20	CDS
chr17	50745804	50745821	+	0.98	3.992	LUC7L3	ENSG00000108848.16	CDS
chr10	68786617	68786693	+	0.99	3.991	CCAR1	ENSG00000060339.14	CDS
chr10	12035057	12035094	-	0.99	3.99	UPF2	ENSG00000151461.20	CDS
chr10	68765903	68765926	+	0.99	3.99	CCAR1	ENSG00000060339.14	CDS
chr14	44120396	44120429	-	0.99	3.989	ENSG00000259137	ENSG00000259137.1	ncRNA
chr3	121694548	121694613	-	0.97	3.989	GOLGB1	ENSG00000173230.17	CDS
chrX	77682127	77682133	-	0.98	3.988	ATRX	ENSG00000085224.23	CDS
chr2	232817026	232817033	+	0.99	3.988	GIGYF2	ENSG00000204120.16	CDS
chr8	116850636	116850644	-	0.99	3.987	RAD21	ENSG00000164754.16	CDS
chr6	44252199	44252204	+	0.99	3.986	HSP90AB1	ENSG00000096384.20	CDS
chr4	112647291	112647347	+	0.98	3.986	LARP7	ENSG00000174720.18	CDS
chr17	8495194	8495236	-	0.98	3.985	MYH10	ENSG00000133026.14	CDS
chr20	54215388	54215435	+	0.99	3.985	PFDN4	ENSG00000101132.10	CDS
chr11	77676868	77676969	-	0.98	3.984	RSF1	ENSG00000048649.14	CDS
chr1	205718422	205718478	-	0.98	3.984	NUCKS1	ENSG00000069275.13	CDS
chr15	51960645	51960711	-	0.99	3.982	LEO1	ENSG00000166477.13	CDS
chr1	205720583	205720589	-	0.98	3.982	NUCKS1	ENSG00000069275.13	CDS
chrX	53412126	53412159	-	0.99	3.981	SMC1A	ENSG00000072501.19	CDS
chr2	231460789	231460810	-	0.98	3.981	NCL	ENSG00000115053.17	CDS
chr3	37326404	37326445	+	0.99	3.979	GOLGA4	ENSG00000144674.18	CDS
chr5	71509799	71509950	+	0.99	3.979	BDP1	ENSG00000145734.20	CDS
chr12	95476091	95476149	+	0.98	3.979	METAP2	ENSG00000111142.14	CDS
chr8	116850619	116850622	-	0.98	3.979	RAD21	ENSG00000164754.16	CDS
chr14	73107849	73107899	+	0.98	3.977	RBM25	ENSG00000119707.14	CDS
chr8	116850631	116850636	-	0.97	3.976	RAD21	ENSG00000164754.16	CDS
chr14	55636464	55636497	+	0.99	3.975	KTN1	ENSG00000126777.18	CDS
chr12	95485878	95485881	+	0.99	3.975	METAP2	ENSG00000111142.14	CDS
chr5	163475565	163475606	+	0.99	3.975	HMMR	ENSG00000072571.20	CDS
chr1	235229248	235229288	-	0.99	3.975	ARID4B	ENSG00000054267.22	CDS
chr19	10182072	10182077	-	0.99	3.974	DNMT1	ENSG00000130816.17	CDS
chr20	41084572	41084575	+	0.99	3.972	TOP1	ENSG00000198900.7	Intron
chrX	53413307	53413379	-	0.99	3.972	SMC1A	ENSG00000072501.19	CDS
chr14	55612567	55612571	+	0.98	3.972	KTN1	ENSG00000126777.18	CDS
chr12	103937750	103937755	+	0.99	3.971	HSP90B1	ENSG00000166598.16	CDS
chr13	81690286	81690295	+	0.99	3.97	PTMAP5	ENSG00000214182.5	ncRNA
chr13	81690295	81690318	+	0.99	3.97	PTMAP5	ENSG00000214182.5	ncRNA
chr1	235213920	235213953	-	0.99	3.97	ARID4B	ENSG00000054267.22	CDS
chr8	116850622	116850627	-	0.99	3.969	RAD21	ENSG00000164754.16	CDS
chrX	136511757	136511771	+	0.98	3.969	HTATSF1	ENSG00000102241.12	CDS
chr10	119056769	119056783	-	0.98	3.968	EIF3A	ENSG00000107581.13	CDS
chr1	193138164	193138177	+	0.99	3.968	CDC73	ENSG00000134371.14	CDS
chr6	44250342	44250344	+	0.98	3.967	HSP90AB1	ENSG00000096384.20	CDS
chr12	71644884	71644911	-	0.99	3.967	ZFC3H1	ENSG00000133858.17	CDS
chrX	81116304	81116320	-	0.98	3.967	HMGN5	ENSG00000198157.11	CDS
chrX	136511578	136511638	+	0.98	3.967	HTATSF1	ENSG00000102241.12	CDS
chr5	150398357	150398385	+	0.98	3.967	TCOF1	ENSG00000070814.22	CDS
chr12	39342032	39342108	-	0.98	3.966	KIF21A	ENSG00000139116.19	CDS
chr11	77676969	77677000	-	0.99	3.966	RSF1	ENSG00000048649.14	CDS
chr4	13608628	13608668	-	0.98	3.965	BOD1L1	ENSG00000038219.13	CDS
chr4	13613519	13613654	-	0.98	3.965	BOD1L1	ENSG00000038219.13	CDS
chr15	41457747	41457798	+	0.98	3.965	RTF1	ENSG00000137815.15	CDS
chr7	92000879	92000976	+	0.98	3.964	AKAP9	ENSG00000127914.19	CDS
chr8	116850614	116850619	-	0.98	3.964	RAD21	ENSG00000164754.16	CDS
chr9	136840151	136840215	+	0.99	3.964	RABL6	ENSG00000196642.19	CDS
chr6	144493375	144493427	+	0.99	3.962	UTRN	ENSG00000152818.19	CDS
chr1	152314491	152314540	-	0.99	3.961	FLG	ENSG00000143631.11	CDS
chr10	12029491	12029524	-	0.99	3.96	UPF2	ENSG00000151461.20	CDS
chr10	27017529	27017708	-	0.98	3.96	ANKRD26	ENSG00000107890.17	CDS
chr1	77926554	77926610	+	0.98	3.96	NEXN	ENSG00000162614.19	CDS
chr8	123371281	123371291	-	0.99	3.96	ATAD2	ENSG00000156802.13	CDS
chr11	62145627	62145685	+	0.99	3.959	INCENP	ENSG00000149503.13	CDS
chr5	72195892	72195906	+	0.99	3.959	MAP1B	ENSG00000131711.15	CDS
chr12	92798929	92798996	-	0.98	3.959	EEA1	ENSG00000102189.17	CDS
chr2	99361501	99361543	+	0.99	3.959	EIF5B	ENSG00000158417.11	CDS
chrX	53412980	53412991	-	0.99	3.958	SMC1A	ENSG00000072501.19	CDS
chr12	103937734	103937738	+	0.98	3.958	HSP90B1	ENSG00000166598.16	CDS
chrX	81118459	81118485	-	0.98	3.957	HMGN5	ENSG00000198157.11	CDS
chr11	130121747	130121758	+	0.99	3.957	APLP2	ENSG00000084234.18	CDS
chr14	21353502	21353529	-	0.99	3.955	SUPT16H	ENSG00000092201.10	CDS
chr20	41076291	41076294	+	0.98	3.955	TOP1	ENSG00000198900.7	CDS
chr8	43007846	43007911	+	0.99	3.954	HOOK3	ENSG00000168172.9	CDS
chr5	72196278	72196301	+	0.98	3.954	MAP1B	ENSG00000131711.15	CDS
chr11	130122403	130122406	+	0.99	3.953	APLP2	ENSG00000084234.18	CDS
chr20	62136853	62136879	-	0.99	3.952	PSMA7	ENSG00000101182.15	CDS
chr20	62136879	62136900	-	0.99	3.952	PSMA7	ENSG00000101182.15	CDS
chr2	152669205	152669253	-	0.98	3.952	PRPF40A	ENSG00000196504.21	CDS
chr3	37319126	37319143	+	0.99	3.951	GOLGA4	ENSG00000144674.18	CDS
chr8	116850627	116850631	-	0.99	3.951	RAD21	ENSG00000164754.16	CDS
chr4	4274371	4274413	-	0.99	3.949	LYAR	ENSG00000145220.14	CDS
chrX	53411858	53411896	-	0.99	3.949	SMC1A	ENSG00000072501.19	CDS
chr3	121694074	121694151	-	0.98	3.949	GOLGB1	ENSG00000173230.17	CDS
chr2	231461882	231461896	-	0.99	3.948	NCL	ENSG00000115053.17	CDS
chr14	73109403	73109448	+	0.99	3.946	RBM25	ENSG00000119707.14	CDS
chr8	123370905	123370920	-	0.99	3.945	ATAD2	ENSG00000156802.13	CDS
chr1	171532746	171532785	+	0.99	3.944	PRRC2C	ENSG00000117523.18	CDS
chr1	205720629	205720642	-	0.98	3.944	NUCKS1	ENSG00000069275.13	CDS
chr5	72195614	72195642	+	0.97	3.943	MAP1B	ENSG00000131711.15	CDS
chr4	77030782	77030785	+	0.98	3.943	SEPTIN11	ENSG00000138758.12	CDS
chr2	231461565	231461574	-	0.99	3.943	NCL	ENSG00000115053.17	CDS
chr2	231460728	231460744	-	0.99	3.942	NCL	ENSG00000115053.17	CDS
chr10	14521268	14521311	-	0.99	3.941	FAM107B	ENSG00000065809.14	CDS
chr20	54215435	54215440	+	0.99	3.941	PFDN4	ENSG00000101132.10	CDS
chr12	103937742	103937747	+	0.99	3.941	HSP90B1	ENSG00000166598.16	CDS
chr2	231460664	231460666	-	0.99	3.941	NCL	ENSG00000115053.17	Intron
chr9	35685517	35685529	-	0.98	3.94	TPM2	ENSG00000198467.16	CDS
chr8	127898348	127898450	+	0.99	3.94	PVT1	ENSG00000249859.14	ncRNA
chr10	116929923	116930006	-	0.99	3.938	SHTN1	ENSG00000187164.20	CDS
chr12	6770182	6770201	+	0.99	3.937	PTMS	ENSG00000159335.18	CDS
chr3	168029220	168029225	-	0.98	3.937	GOLIM4	ENSG00000173905.9	CDS
chr2	170752214	170752261	+	0.98	3.937	EIF2S2P4	ENSG00000128692.8	ncRNA
chr12	95474326	95474330	+	0.99	3.936	METAP2	ENSG00000111142.14	CDS
chr17	50745748	50745761	+	0.99	3.935	LUC7L3	ENSG00000108848.16	CDS
chr2	71134619	71134686	+	0.99	3.935	MPHOSPH10	ENSG00000124383.11	CDS
chr12	122328290	122328364	-	0.99	3.935	CLIP1	ENSG00000130779.22	CDS
chr20	31798456	31798500	+	0.99	3.934	TPX2	ENSG00000088325.16	CDS
chr14	73110832	73110849	+	0.99	3.934	RBM25	ENSG00000119707.14	CDS
chr9	35689204	35689209	-	0.97	3.933	TPM2	ENSG00000198467.16	CDS
chr15	57452147	57452229	+	0.99	3.933	CGNL1	ENSG00000128849.11	CDS
chr11	77675066	77675097	-	0.99	3.933	RSF1	ENSG00000048649.14	CDS
chrX	81114629	81114653	-	0.99	3.932	HMGN5	ENSG00000198157.11	CDS
chr10	102161064	102161091	+	0.99	3.931	NOLC1	ENSG00000166197.17	CDS
chr12	103943828	103943836	+	0.98	3.931	HSP90B1	ENSG00000166598.16	CDS
chr14	21352787	21352815	-	0.98	3.93	SUPT16H	ENSG00000092201.10	CDS
chr15	99258593	99258606	+	0.99	3.93	HSP90B2P	ENSG00000259706.1	ncRNA
chr8	116849007	116849013	-	0.99	3.93	RAD21	ENSG00000164754.16	CDS
chr2	152669129	152669188	-	0.99	3.93	PRPF40A	ENSG00000196504.21	CDS
chr14	35078990	35079018	+	0.99	3.929	FAM177A1	ENSG00000151327.14	CDS
chr8	42997570	42997636	+	0.97	3.929	HOOK3	ENSG00000168172.9	CDS
chr5	72195800	72195837	+	0.99	3.928	MAP1B	ENSG00000131711.15	CDS
chr13	81690266	81690286	+	0.97	3.928	PTMAP5	ENSG00000214182.5	ncRNA
chr7	134950412	134950481	+	0.99	3.928	CALD1	ENSG00000122786.20	CDS
chr8	38843331	38843342	+	0.97	3.927	TACC1	ENSG00000147526.20	CDS
chr1	70250364	70250430	+	0.98	3.927	SRSF11	ENSG00000116754.14	CDS
chr19	10168329	10168365	-	0.96	3.926	DNMT1	ENSG00000130816.17	CDS
chr3	121697642	121697690	-	0.97	3.926	GOLGB1	ENSG00000173230.17	CDS
chr5	150396753	150396806	+	0.97	3.926	TCOF1	ENSG00000070814.22	CDS
chr8	123371235	123371237	-	0.99	3.925	ATAD2	ENSG00000156802.13	CDS
chr11	27889887	27889933	-	0.99	3.924	HSP90AA2P	ENSG00000224411.3	ncRNA
chr1	205719594	205719625	-	0.99	3.923	NUCKS1	ENSG00000069275.13	CDS
chr18	9516928	9517035	+	0.98	3.919	RALBP1	ENSG00000017797.13	CDS
chr17	50743711	50743720	+	0.99	3.919	LUC7L3	ENSG00000108848.16	CDS
chr1	205720642	205720664	-	0.99	3.919	NUCKS1	ENSG00000069275.13	CDS
chr6	44250339	44250342	+	0.99	3.918	HSP90AB1	ENSG00000096384.20	CDS
chr5	72195937	72195977	+	0.98	3.917	MAP1B	ENSG00000131711.15	CDS
chr6	44252204	44252225	+	0.98	3.916	HSP90AB1	ENSG00000096384.20	CDS
chr14	55636537	55636540	+	0.99	3.916	KTN1	ENSG00000126777.18	Intron
chr12	71644914	71644971	-	0.99	3.916	ZFC3H1	ENSG00000133858.17	CDS
chr14	73110830	73110832	+	0.99	3.916	RBM25	ENSG00000119707.14	CDS
chr1	66959669	66959746	+	0.99	3.915	MIER1	ENSG00000198160.15	CDS
chr8	123369977	123370030	-	0.99	3.915	ATAD2	ENSG00000156802.13	CDS
chr11	18612314	18612429	-	0.98	3.914	SPTY2D1	ENSG00000179119.15	CDS
chr21	32609836	32610001	-	0.99	3.914	CFAP298|CFAP298-TCP10L	ENSG00000265590.10||ENSG00000159079.19	CDS
chr14	102083149	102083158	-	0.99	3.914	HSP90AA1	ENSG00000080824.19	CDS
chr12	103943810	103943828	+	0.98	3.914	HSP90B1	ENSG00000166598.16	CDS
chr1	43164343	43164446	-	0.99	3.913	EBNA1BP2	ENSG00000117395.13	CDS
chr19	10166593	10166611	-	0.99	3.912	DNMT1	ENSG00000130816.17	CDS
chr17	50745719	50745722	+	0.98	3.912	LUC7L3	ENSG00000108848.16	CDS
chr12	92832512	92832635	-	0.99	3.912	EEA1	ENSG00000102189.17	CDS
chr1	214639920	214639924	+	0.99	3.912	CENPF	ENSG00000117724.14	CDS
chr1	93876558	93876579	-	0.99	3.911	DNTTIP2	ENSG00000067334.14	CDS
chr17	8509870	8509890	-	0.97	3.91	MYH10	ENSG00000133026.14	CDS
chr10	42797101	42797164	+	0.98	3.91	BMS1	ENSG00000165733.8	CDS
chr8	123372644	123372650	-	0.99	3.91	ATAD2	ENSG00000156802.13	CDS
chr11	130121663	130121676	+	0.99	3.91	APLP2	ENSG00000084234.18	CDS
chr1	171532493	171532498	+	0.99	3.91	PRRC2C	ENSG00000117523.18	CDS
chr2	174348567	174348741	-	0.98	3.91	CIR1	ENSG00000138433.16	CDS
chr10	12035094	12035107	-	0.98	3.909	UPF2	ENSG00000151461.20	CDS
chr11	17330173	17330242	+	0.99	3.909	NUCB2	ENSG00000070081.18	CDS
chr8	123372638	123372644	-	0.98	3.909	ATAD2	ENSG00000156802.13	CDS
chr6	151349171	151349214	+	0.98	3.909	AKAP12	ENSG00000131016.17	CDS
chr6	44250320	44250335	+	0.99	3.908	HSP90AB1	ENSG00000096384.20	CDS
chrX	154448483	154448529	+	0.99	3.908	FAM50A	ENSG00000071859.15	CDS
chr1	226161530	226161581	-	0.95	3.908	ACBD3	ENSG00000182827.9	CDS
chr14	55616587	55616637	+	0.99	3.907	KTN1	ENSG00000126777.18	CDS
chr15	99258546	99258593	+	0.98	3.907	HSP90B2P	ENSG00000259706.1	ncRNA
chr12	103942563	103942571	+	0.98	3.907	HSP90B1	ENSG00000166598.16	CDS
chr15	58893926	58893952	-	0.99	3.906	SLTM	ENSG00000137776.17	CDS
chr5	72195977	72195997	+	0.98	3.905	MAP1B	ENSG00000131711.15	CDS
chr6	44250335	44250339	+	0.98	3.904	HSP90AB1	ENSG00000096384.20	CDS
chrX	77654127	77654201	-	0.98	3.904	ATRX	ENSG00000085224.23	CDS
chr20	34098497	34098564	-	0.99	3.903	EIF2S2	ENSG00000125977.7	CDS
chr10	27044186	27044190	-	0.99	3.902	ANKRD26	ENSG00000107890.17	CDS
chr12	95494138	95494189	+	0.99	3.902	METAP2	ENSG00000111142.14	CDS
chr8	116849013	116849036	-	0.99	3.902	RAD21	ENSG00000164754.16	CDS
chr3	37319062	37319126	+	0.99	3.901	GOLGA4	ENSG00000144674.18	CDS
chr3	47710704	47710717	-	0.98	3.901	SMARCC1	ENSG00000173473.11	CDS
chr20	41098280	41098299	+	0.99	3.9	TOP1	ENSG00000198900.7	CDS
chr14	73109337	73109393	+	0.98	3.9	RBM25	ENSG00000119707.14	CDS
chr2	169811247	169811270	+	0.99	3.9	SSB	ENSG00000138385.16	CDS
chr4	13608580	13608628	-	0.98	3.899	BOD1L1	ENSG00000038219.13	CDS
chr14	21363232	21363236	-	0.98	3.899	SUPT16H	ENSG00000092201.10	CDS
chr15	56464026	56464058	-	0.98	3.899	MNS1	ENSG00000138587.6	CDS
chr1	77929354	77929378	+	0.99	3.899	NEXN	ENSG00000162614.19	CDS
chr11	110237622	110237653	-	0.98	3.899	RDX	ENSG00000137710.17	CDS
chr8	97713736	97713765	+	0.99	3.898	MTDH	ENSG00000147649.10	CDS
chr11	130122421	130122430	+	0.99	3.898	APLP2	ENSG00000084234.18	CDS
chr11	27889840	27889887	-	0.99	3.896	HSP90AA2P	ENSG00000224411.3	ncRNA
chr20	41098259	41098280	+	0.98	3.895	TOP1	ENSG00000198900.7	CDS
chr14	74812736	74812784	+	0.98	3.895	YLPM1	ENSG00000119596.18	CDS
chr1	205723924	205723945	-	0.99	3.895	NUCKS1	ENSG00000069275.13	CDS
chr17	8492983	8493004	-	0.98	3.894	MYH10	ENSG00000133026.14	CDS
chr1	205720589	205720617	-	0.98	3.894	NUCKS1	ENSG00000069275.13	CDS
chr9	15472670	15472707	-	0.98	3.893	PSIP1	ENSG00000164985.15	CDS
chr4	15536914	15537025	+	0.99	3.893	CC2D2A	ENSG00000048342.18	CDS
chr20	16379760	16379827	-	0.97	3.893	KIF16B	ENSG00000089177.19	CDS
chr15	36613572	36613636	+	0.99	3.893	ENSG00000261635	ENSG00000261635.2	ncRNA
chr10	93517180	93517231	+	0.99	3.893	CEP55	ENSG00000138180.16	CDS
chr2	231461931	231461957	-	0.98	3.893	NCL	ENSG00000115053.17	CDS
chr1	77929378	77929414	+	0.98	3.892	NEXN	ENSG00000162614.19	CDS
chr12	103943836	103943871	+	0.97	3.892	HSP90B1	ENSG00000166598.16	CDS
chr1	93876519	93876546	-	0.98	3.891	DNTTIP2	ENSG00000067334.14	CDS
chr10	89737733	89737758	+	0.99	3.89	KIF20B	ENSG00000138182.15	CDS
chr2	231712507	231712515	+	0.99	3.89	PTMA	ENSG00000187514.17	CDS
chrX	81119799	81119810	-	0.97	3.889	HMGN5	ENSG00000198157.11	CDS
chr8	94529203	94529226	-	0.97	3.889	VIRMA	ENSG00000164944.12	CDS
chr9	35685529	35685537	-	0.99	3.888	TPM2	ENSG00000198467.16	CDS
chr17	7894439	7894491	+	0.98	3.887	CHD3	ENSG00000170004.19	CDS
chr9	113169771	113169900	-	0.99	3.887	FKBP15	ENSG00000119321.10	CDS
chr3	168010329	168010343	-	0.99	3.887	GOLIM4	ENSG00000173905.9	CDS
chr1	25901597	25901617	-	0.99	3.886	STMN1	ENSG00000117632.23	CDS
chr20	34105429	34105432	-	0.98	3.886	EIF2S2	ENSG00000125977.7	CDS
chr6	44250561	44250578	+	0.99	3.886	HSP90AB1	ENSG00000096384.20	CDS
chr10	68765885	68765889	+	0.98	3.886	CCAR1	ENSG00000060339.14	CDS
chr16	89282778	89282811	-	0.99	3.886	ANKRD11	ENSG00000167522.17	CDS
chr14	102083158	102083206	-	0.99	3.886	HSP90AA1	ENSG00000080824.19	CDS
chr2	11211740	11211801	-	0.98	3.885	ROCK2	ENSG00000134318.16	CDS
chr7	92079092	92079216	+	0.99	3.884	AKAP9	ENSG00000127914.19	CDS
chr2	231460763	231460780	-	0.98	3.884	NCL	ENSG00000115053.17	CDS
chr20	41097272	41097341	+	0.98	3.883	TOP1	ENSG00000198900.7	CDS
chr1	77929479	77929507	+	0.99	3.883	NEXN	ENSG00000162614.19	CDS
chr13	81690240	81690266	+	0.99	3.883	PTMAP5	ENSG00000214182.5	ncRNA
chr10	104021693	104021732	+	0.99	3.883	SLK	ENSG00000065613.15	CDS
chr12	6770214	6770218	+	0.97	3.881	PTMS	ENSG00000159335.18	CDS
chr10	32033990	32034017	-	0.99	3.881	KIF5B	ENSG00000170759.11	CDS
chr6	89662089	89662182	-	0.98	3.881	MDN1	ENSG00000112159.13	CDS
chr20	41098299	41098326	+	0.98	3.88	TOP1	ENSG00000198900.7	CDS
chr17	50745771	50745788	+	0.99	3.88	LUC7L3	ENSG00000108848.16	CDS
chr5	163483102	163483153	+	0.99	3.879	HMMR	ENSG00000072571.20	CDS
chr8	116850644	116850677	-	0.99	3.878	RAD21	ENSG00000164754.16	CDS
chr10	119058016	119058073	-	0.98	3.878	EIF3A	ENSG00000107581.13	CDS
chr12	122328156	122328162	-	0.99	3.878	CLIP1	ENSG00000130779.22	CDS
chr14	102083835	102083885	-	0.98	3.877	HSP90AA1	ENSG00000080824.19	CDS
chr12	122328259	122328262	-	0.98	3.877	CLIP1	ENSG00000130779.22	CDS
chr2	231461896	231461905	-	0.97	3.877	NCL	ENSG00000115053.17	CDS
chr11	77683742	77683820	-	0.98	3.876	RSF1	ENSG00000048649.14	CDS
chr20	49241946	49241979	+	0.99	3.874	DDX27	ENSG00000124228.15	CDS
chr6	7579640	7579764	+	0.97	3.873	DSP	ENSG00000096696.15	CDS
chr1	77933439	77933478	+	0.98	3.871	NEXN	ENSG00000162614.19	CDS
chr17	50745761	50745771	+	0.99	3.87	LUC7L3	ENSG00000108848.16	CDS
chr9	89338471	89338523	+	0.99	3.87	SECISBP2	ENSG00000187742.15	CDS
chr1	205720617	205720629	-	0.97	3.87	NUCKS1	ENSG00000069275.13	CDS
chr11	66061689	66061703	+	0.98	3.869	SF3B2	ENSG00000087365.16	CDS
chr7	73477834	73477871	-	0.99	3.869	BAZ1B	ENSG00000009954.11	CDS
chr2	231460744	231460763	-	0.99	3.869	NCL	ENSG00000115053.17	CDS
chr6	30580414	30580456	+	0.98	3.868	ABCF1	ENSG00000204574.14	CDS
chr2	99361188	99361250	+	0.98	3.868	EIF5B	ENSG00000158417.11	CDS
chr7	134941124	134941166	+	0.98	3.868	CALD1	ENSG00000122786.20	CDS
chr11	27889697	27889711	-	0.97	3.867	HSP90AA2P	ENSG00000224411.3	ncRNA
chr10	68786162	68786218	+	0.95	3.866	CCAR1	ENSG00000060339.14	CDS
chr1	193122245	193122273	+	0.98	3.866	CDC73	ENSG00000134371.14	CDS
chr20	16379423	16379576	-	0.99	3.865	KIF16B	ENSG00000089177.19	CDS
chr8	116849001	116849007	-	0.99	3.865	RAD21	ENSG00000164754.16	CDS
chr10	119056783	119056829	-	0.98	3.865	EIF3A	ENSG00000107581.13	CDS
chr14	55633273	55633293	+	0.97	3.864	KTN1	ENSG00000126777.18	CDS
chr1	235213953	235214030	-	0.99	3.864	ARID4B	ENSG00000054267.22	CDS
chr11	27889682	27889697	-	0.98	3.863	HSP90AA2P	ENSG00000224411.3	ncRNA
chr10	32019857	32019879	-	0.95	3.862	KIF5B	ENSG00000170759.11	CDS
chr2	186502495	186502522	+	0.98	3.862	ZC3H15	ENSG00000065548.18	CDS
chr6	4031877	4031903	+	0.98	3.861	PRPF4B	ENSG00000112739.17	CDS
chrX	81121534	81121580	-	0.98	3.861	HMGN5	ENSG00000198157.11	CDS
chr5	16701781	16701793	-	0.98	3.86	MYO10	ENSG00000145555.15	CDS
chr20	41061393	41061490	+	0.98	3.86	TOP1	ENSG00000198900.7	CDS
chr1	171532445	171532473	+	0.99	3.859	PRRC2C	ENSG00000117523.18	CDS
chr17	7890575	7890711	+	0.98	3.857	CHD3	ENSG00000170004.19	CDS
chr14	102084462	102084492	-	0.99	3.857	HSP90AA1	ENSG00000080824.19	CDS
chr2	231463275	231463290	-	0.98	3.857	NCL	ENSG00000115053.17	CDS
chr6	30582393	30582499	+	0.99	3.856	ABCF1	ENSG00000204574.14	CDS
chr8	56476992	56477067	-	0.98	3.856	SEPTIN10P1	ENSG00000253541.1	ncRNA
chr1	66958177	66958220	+	0.98	3.856	MIER1	ENSG00000198160.15	CDS
chrX	81118733	81118758	-	0.98	3.855	HMGN5	ENSG00000198157.11	CDS
chr14	55637340	55637364	+	0.98	3.854	KTN1	ENSG00000126777.18	CDS
chr4	121816803	121816862	+	0.99	3.854	EXOSC9	ENSG00000123737.13	CDS
chr20	41076245	41076291	+	0.98	3.853	TOP1	ENSG00000198900.7	CDS
chr2	99369456	99369481	+	0.96	3.853	EIF5B	ENSG00000158417.11	CDS
chr14	102083816	102083835	-	0.99	3.853	HSP90AA1	ENSG00000080824.19	CDS
chr2	99361614	99361635	+	0.98	3.852	EIF5B	ENSG00000158417.11	CDS
chr6	144479819	144479913	+	0.99	3.852	UTRN	ENSG00000152818.19	CDS
chr3	37326368	37326404	+	0.98	3.851	GOLGA4	ENSG00000144674.18	CDS
chr2	99361290	99361371	+	0.98	3.851	EIF5B	ENSG00000158417.11	CDS
chr8	38843290	38843331	+	0.98	3.85	TACC1	ENSG00000147526.20	CDS
chr4	77030785	77030789	+	0.99	3.85	SEPTIN11	ENSG00000138758.12	CDS
chr4	13611005	13611095	-	0.98	3.849	BOD1L1	ENSG00000038219.13	CDS
chr20	16379668	16379760	-	0.98	3.849	KIF16B	ENSG00000089177.19	CDS
chr20	41092476	41092526	+	0.99	3.848	TOP1	ENSG00000198900.7	CDS
chr4	56011410	56011462	+	0.98	3.847	CEP135	ENSG00000174799.11	CDS
chr1	77926516	77926554	+	0.98	3.847	NEXN	ENSG00000162614.19	CDS
chr2	231460780	231460789	-	0.99	3.847	NCL	ENSG00000115053.17	CDS
chr1	66958060	66958091	+	0.99	3.845	MIER1	ENSG00000198160.15	CDS
chr8	116848986	116849001	-	0.98	3.845	RAD21	ENSG00000164754.16	CDS
chr12	6770172	6770182	+	0.99	3.844	PTMS	ENSG00000159335.18	CDS
chr10	32033962	32033990	-	0.99	3.844	KIF5B	ENSG00000170759.11	CDS
chr9	35685466	35685470	-	0.99	3.844	TPM2	ENSG00000198467.16	CDS
chr9	136813992	136814044	-	0.97	3.844	NCLP1	ENSG00000213212.3	ncRNA
chr10	68765926	68765943	+	0.99	3.843	CCAR1	ENSG00000060339.14	CDS
chr8	94529226	94529267	-	0.99	3.843	VIRMA	ENSG00000164944.12	CDS
chr11	107433686	107433740	-	0.99	3.843	CWF19L2	ENSG00000152404.16	CDS
chr1	193138111	193138148	+	0.96	3.843	CDC73	ENSG00000134371.14	CDS
chr8	67159071	67159110	+	0.98	3.842	CSPP1	ENSG00000104218.16	CDS
chr1	205749956	205749959	-	0.98	3.841	NUCKS1	ENSG00000069275.13	CDS
chr1	150223237	150223240	-	0.99	3.839	ANP32E	ENSG00000143401.15	CDS
chr10	42796911	42797075	+	0.96	3.838	BMS1	ENSG00000165733.8	CDS
chrX	77682180	77682240	-	0.99	3.838	ATRX	ENSG00000085224.23	CDS
chr1	93876478	93876519	-	0.98	3.838	DNTTIP2	ENSG00000067334.14	CDS
chr1	214639924	214639943	+	0.99	3.838	CENPF	ENSG00000117724.14	CDS
chr14	102083641	102083676	-	0.98	3.837	HSP90AA1	ENSG00000080824.19	CDS
chr8	61548173	61548207	-	0.98	3.836	ASPH	ENSG00000198363.18	CDS
chr11	10775205	10775287	+	0.98	3.835	CTR9	ENSG00000198730.9	CDS
chr9	35685537	35685548	-	0.99	3.834	TPM2	ENSG00000198467.16	CDS
chr20	41098233	41098259	+	0.99	3.832	TOP1	ENSG00000198900.7	CDS
chrX	136511671	136511736	+	0.98	3.832	HTATSF1	ENSG00000102241.12	CDS
chr17	8499271	8499346	-	0.99	3.831	MYH10	ENSG00000133026.14	CDS
chr12	1236762	1236807	+	0.99	3.83	ERC1	ENSG00000082805.21	CDS
chr17	40630709	40630772	-	0.99	3.83	SMARCE1	ENSG00000073584.20	CDS
chr5	72195906	72195937	+	0.98	3.83	MAP1B	ENSG00000131711.15	CDS
chr20	41097213	41097272	+	0.99	3.829	TOP1	ENSG00000198900.7	CDS
chr1	51840224	51840258	-	0.97	3.829	NRDC	ENSG00000078618.23	CDS
chr10	68761189	68761192	+	0.98	3.829	CCAR1	ENSG00000060339.14	CDS
chr4	13337202	13337225	+	0.98	3.828	HSP90AB2P	ENSG00000205940.8	ncRNA
chr2	11201331	11201413	-	0.99	3.827	ROCK2	ENSG00000134318.16	CDS
chr3	168025017	168025055	-	0.99	3.827	GOLIM4	ENSG00000173905.9	CDS
chr13	45969784	45969879	-	0.99	3.826	ZC3H13	ENSG00000123200.17	CDS
chr1	158524289	158524374	+	0.99	3.826	HSP90AA3P	ENSG00000231434.1	ncRNA
chr1	214639943	214639963	+	0.98	3.826	CENPF	ENSG00000117724.14	CDS
chr19	6381358	6381454	-	0.97	3.825	GTF2F1	ENSG00000125651.14	CDS
chr13	45975282	45975404	-	0.98	3.823	ZC3H13	ENSG00000123200.17	CDS
chr4	173332176	173332238	-	0.98	3.823	HMGB2	ENSG00000164104.12	CDS
chr3	37327178	37327205	+	0.99	3.822	GOLGA4	ENSG00000144674.18	CDS
chr15	99258431	99258488	+	0.99	3.822	HSP90B2P	ENSG00000259706.1	ncRNA
chr9	136813963	136813992	-	0.99	3.822	NCLP1	ENSG00000213212.3	ncRNA
chr5	160404438	160404495	-	0.98	3.822	SLU7	ENSG00000164609.10	CDS
chr15	58894142	58894191	-	0.98	3.821	SLTM	ENSG00000137776.17	CDS
chrX	136511464	136511526	+	0.99	3.821	HTATSF1	ENSG00000102241.12	CDS
chr17	50745788	50745804	+	0.98	3.82	LUC7L3	ENSG00000108848.16	CDS
chr5	132618068	132618087	+	0.99	3.82	RAD50|ENSG00000283782	ENSG00000113522.14||ENSG00000283782.2	CDS
chr1	205719642	205719652	-	0.98	3.82	NUCKS1	ENSG00000069275.13	CDS
chr12	6578845	6578847	-	0.98	3.819	CHD4	ENSG00000111642.16	CDS
chr20	54219021	54219034	+	0.97	3.819	PFDN4	ENSG00000101132.10	CDS
chr14	55637291	55637340	+	0.99	3.819	KTN1	ENSG00000126777.18	CDS
chr15	58890348	58890412	-	0.98	3.819	SLTM	ENSG00000137776.17	CDS
chr10	94354966	94355093	-	0.99	3.819	NOC3L	ENSG00000173145.11	CDS
chr10	12029427	12029491	-	0.99	3.817	UPF2	ENSG00000151461.20	CDS
chr12	95474156	95474216	+	0.98	3.817	METAP2	ENSG00000111142.14	CDS
chr10	119042672	119042684	-	0.99	3.817	EIF3A	ENSG00000107581.13	CDS
chr6	4031572	4031665	+	0.99	3.816	PRPF4B	ENSG00000112739.17	CDS
chr9	35685134	35685139	-	0.98	3.816	TPM2	ENSG00000198467.16	CDS
chr3	168010281	168010329	-	0.99	3.816	GOLIM4	ENSG00000173905.9	CDS
chr1	214640042	214640054	+	0.99	3.816	CENPF	ENSG00000117724.14	CDS
chr15	66499390	66499420	-	0.99	3.815	RPL4	ENSG00000174444.15	CDS
chr8	67159110	67159137	+	0.97	3.815	CSPP1	ENSG00000104218.16	CDS
chr12	95476175	95476181	+	0.98	3.815	METAP2	ENSG00000111142.14	CDS
chr12	6578527	6578533	-	0.99	3.813	CHD4	ENSG00000111642.16	CDS
chr14	34795710	34795766	-	0.97	3.813	BAZ1A	ENSG00000198604.11	CDS
chr11	130121676	130121691	+	0.99	3.813	APLP2	ENSG00000084234.18	CDS
chr2	231461587	231461607	-	0.97	3.812	NCL	ENSG00000115053.17	CDS
chr4	13611095	13611101	-	0.99	3.811	BOD1L1	ENSG00000038219.13	CDS
chr5	42465455	42465537	-	0.99	3.811	SERBP1P6	ENSG00000248873.1	ncRNA
chr17	8508555	8508583	-	0.98	3.81	MYH10	ENSG00000133026.14	CDS
chr14	50758246	50758328	-	0.99	3.809	NIN	ENSG00000100503.26	CDS
chr2	58461434	58461445	-	0.99	3.809	ENSG00000231043	ENSG00000231043.3	ncRNA
chr6	56592180	56592206	-	0.99	3.808	DST	ENSG00000151914.22	CDS
chr15	58893278	58893330	-	0.99	3.808	SLTM	ENSG00000137776.17	CDS
chr4	112644709	112644791	+	0.99	3.808	LARP7	ENSG00000174720.18	CDS
chr8	123369958	123369977	-	0.98	3.808	ATAD2	ENSG00000156802.13	CDS
chr10	119057024	119057038	-	0.99	3.807	EIF3A	ENSG00000107581.13	CDS
chrX	77663380	77663415	-	0.98	3.806	ATRX	ENSG00000085224.23	CDS
chr2	99361250	99361290	+	0.99	3.806	EIF5B	ENSG00000158417.11	CDS
chr12	103941476	103941502	+	0.99	3.806	HSP90B1	ENSG00000166598.16	CDS
chrX	136244640	136244792	-	0.97	3.806	MAP7D3	ENSG00000129680.16	CDS
chr3	168024564	168024594	-	0.99	3.806	GOLIM4	ENSG00000173905.9	CDS
chr6	143863251	143863285	+	0.98	3.805	LTV1	ENSG00000135521.9	CDS
chr21	32607646	32607724	-	0.97	3.803	CFAP298-TCP10L|CFAP298	ENSG00000265590.10||ENSG00000159079.19	CDS
chr15	58893952	58893987	-	0.98	3.803	SLTM	ENSG00000137776.17	CDS
chr20	41098217	41098233	+	0.97	3.802	TOP1	ENSG00000198900.7	CDS
chr20	49242190	49242206	+	0.99	3.802	DDX27	ENSG00000124228.15	CDS
chr6	75313833	75313980	-	0.99	3.802	FILIP1	ENSG00000118407.15	CDS
chr17	4671917	4671947	-	0.98	3.801	PELP1	ENSG00000141456.16	CDS
chrX	77652194	77652353	-	0.97	3.801	ATRX	ENSG00000085224.23	CDS
chr16	89283315	89283376	-	0.98	3.801	ANKRD11	ENSG00000167522.17	CDS
chr12	122332983	122333039	-	0.97	3.801	CLIP1	ENSG00000130779.22	CDS
chr1	205719652	205719674	-	0.99	3.801	NUCKS1	ENSG00000069275.13	CDS
chr4	38931560	38931615	+	0.99	3.8	FAM114A1	ENSG00000197712.12	CDS
chr1	156595573	156595706	-	0.98	3.8	GPATCH4	ENSG00000160818.17	ncRNA
chr9	35685648	35685654	-	0.99	3.799	TPM2	ENSG00000198467.16	CDS
chr14	73105917	73105994	+	0.98	3.799	RBM25	ENSG00000119707.14	CDS
chr1	186341322	186341358	-	0.97	3.798	TPR	ENSG00000047410.14	CDS
chr14	21363317	21363330	-	0.99	3.797	SUPT16H	ENSG00000092201.10	CDS
chr16	89283059	89283108	-	0.99	3.797	ANKRD11	ENSG00000167522.17	CDS
chr12	103943253	103943256	+	0.99	3.797	HSP90B1	ENSG00000166598.16	CDS
chr5	163483153	163483172	+	0.98	3.797	HMMR	ENSG00000072571.20	CDS
chr12	95476157	95476175	+	0.99	3.796	METAP2	ENSG00000111142.14	CDS
chr2	170751812	170751825	+	0.97	3.796	EIF2S2P4	ENSG00000128692.8	ncRNA
chr11	17310903	17310950	+	0.99	3.795	NUCB2	ENSG00000070081.18	CDS
chr11	130121745	130121747	+	0.99	3.795	APLP2	ENSG00000084234.18	CDS
chr5	72196397	72196448	+	0.98	3.794	MAP1B	ENSG00000131711.15	CDS
chr10	104001518	104001547	+	0.99	3.794	SLK	ENSG00000065613.15	CDS
chr20	31775943	31775955	+	0.98	3.793	TPX2	ENSG00000088325.16	CDS
chr17	8504878	8504907	-	0.99	3.792	MYH10	ENSG00000133026.14	CDS
chr16	11839940	11839959	-	0.99	3.792	RSL1D1	ENSG00000171490.13	CDS
chr1	91643717	91643747	+	0.99	3.792	HSP90B3P	ENSG00000203914.4	ncRNA
chr1	205719674	205719679	-	0.98	3.792	NUCKS1	ENSG00000069275.13	CDS
chr2	58461420	58461434	-	0.98	3.791	ENSG00000231043	ENSG00000231043.3	ncRNA
chr14	73110975	73110990	+	0.99	3.791	RBM25	ENSG00000119707.14	CDS
chr8	123370901	123370905	-	0.98	3.791	ATAD2	ENSG00000156802.13	CDS
chrX	136511799	136511918	+	0.99	3.791	HTATSF1	ENSG00000102241.12	CDS
chr14	55616569	55616587	+	0.99	3.79	KTN1	ENSG00000126777.18	CDS
chr1	205727766	205727800	-	0.99	3.79	NUCKS1	ENSG00000069275.13	CDS
chr20	16379827	16379902	-	0.99	3.789	KIF16B	ENSG00000089177.19	CDS
chr1	70250430	70250443	+	0.98	3.789	SRSF11	ENSG00000116754.14	CDS
chr12	103942526	103942563	+	0.99	3.788	HSP90B1	ENSG00000166598.16	CDS
chr17	8493004	8493025	-	0.98	3.787	MYH10	ENSG00000133026.14	CDS
chr2	11211676	11211740	-	0.99	3.787	ROCK2	ENSG00000134318.16	CDS
chr15	41471175	41471261	+	0.98	3.786	RTF1	ENSG00000137815.15	CDS
chr12	79795651	79795761	-	0.99	3.786	PPP1R12A	ENSG00000058272.19	CDS
chrX	119925223	119925346	-	0.99	3.786	NKAP	ENSG00000101882.10	CDS
chr1	171532487	171532493	+	0.99	3.786	PRRC2C	ENSG00000117523.18	CDS
chr1	205719625	205719642	-	0.98	3.786	NUCKS1	ENSG00000069275.13	CDS
chr6	18237513	18237517	-	0.99	3.785	DEK	ENSG00000124795.17	CDS
chr10	119058157	119058194	-	0.99	3.785	EIF3A	ENSG00000107581.13	CDS
chr2	231461582	231461587	-	0.98	3.785	NCL	ENSG00000115053.17	CDS
chr20	49242620	49242668	+	0.99	3.784	DDX27	ENSG00000124228.15	CDS
chr9	104125060	104125105	+	0.99	3.784	SMC2	ENSG00000136824.19	CDS
chr17	8509890	8509954	-	0.99	3.783	MYH10	ENSG00000133026.14	CDS
chr14	21427867	21427913	-	0.98	3.783	CHD8	ENSG00000100888.15	CDS
chr2	152663742	152663771	-	0.98	3.783	PRPF40A	ENSG00000196504.21	CDS
chr1	193125109	193125161	+	0.99	3.783	CDC73	ENSG00000134371.14	CDS
chr17	7889665	7889771	+	0.98	3.781	CHD3	ENSG00000170004.19	CDS
chr15	41417146	41417308	+	0.99	3.781	RTF1	ENSG00000137815.15	CDS
chr2	101856131	101856141	+	0.98	3.781	MAP4K4	ENSG00000071054.17	CDS
chr7	134928877	134928900	+	0.99	3.781	CALD1	ENSG00000122786.20	CDS
chrY	13095378	13095448	+	0.99	3.78	SFPQP1	ENSG00000224035.1	ncRNA
chr10	68959804	68959827	+	0.98	3.78	DDX21	ENSG00000165732.14	CDS
chr1	186344374	186344416	-	0.99	3.78	TPR	ENSG00000047410.14	CDS
chr10	103999209	103999241	+	0.98	3.779	SLK	ENSG00000065613.15	CDS
chr5	150399021	150399023	+	0.98	3.779	TCOF1	ENSG00000070814.22	CDS
chr6	30577408	30577456	+	0.99	3.778	ABCF1	ENSG00000204574.14	CDS
chr5	72196045	72196065	+	0.98	3.778	MAP1B	ENSG00000131711.15	CDS
chr2	169811196	169811247	+	0.99	3.778	SSB	ENSG00000138385.16	CDS
chr2	231461905	231461931	-	0.97	3.778	NCL	ENSG00000115053.17	CDS
chr16	30768645	30768732	+	0.98	3.777	RNF40	ENSG00000103549.22	CDS
chr8	94529188	94529203	-	0.98	3.777	VIRMA	ENSG00000164944.12	CDS
chr11	130121636	130121663	+	0.98	3.777	APLP2	ENSG00000084234.18	CDS
chr5	160406569	160406594	-	0.99	3.777	SLU7	ENSG00000164609.10	CDS
chr12	79795641	79795651	-	0.99	3.776	PPP1R12A	ENSG00000058272.19	CDS
chr12	122327949	122328001	-	0.97	3.776	CLIP1	ENSG00000130779.22	CDS
chr1	150226744	150226796	-	0.99	3.776	ANP32E	ENSG00000143401.15	CDS
chr2	152669188	152669205	-	0.99	3.776	PRPF40A	ENSG00000196504.21	CDS
chr1	214637891	214637947	+	0.96	3.776	CENPF	ENSG00000117724.14	CDS
chr10	42797184	42797200	+	0.98	3.774	BMS1	ENSG00000165733.8	CDS
chrX	53411896	53411903	-	0.99	3.774	SMC1A	ENSG00000072501.19	CDS
chr4	13337225	13337265	+	0.99	3.773	HSP90AB2P	ENSG00000205940.8	ncRNA
chr10	42797200	42797232	+	0.99	3.773	BMS1	ENSG00000165733.8	CDS
chr1	91643701	91643717	+	0.99	3.773	HSP90B3P	ENSG00000203914.4	ncRNA
chr2	99360247	99360318	+	0.99	3.772	EIF5B	ENSG00000158417.11	CDS
chr2	231461574	231461582	-	0.98	3.772	NCL	ENSG00000115053.17	CDS
chr9	15474047	15474083	-	0.98	3.771	PSIP1	ENSG00000164985.15	CDS
chr14	55629978	55630007	+	0.99	3.771	KTN1	ENSG00000126777.18	CDS
chr9	35685454	35685466	-	0.99	3.769	TPM2	ENSG00000198467.16	CDS
chr2	99361572	99361593	+	0.98	3.769	EIF5B	ENSG00000158417.11	CDS
chr9	35685646	35685648	-	0.98	3.768	TPM2	ENSG00000198467.16	CDS
chr12	103943234	103943238	+	0.99	3.768	HSP90B1	ENSG00000166598.16	CDS
chr2	232815634	232815738	+	0.99	3.767	GIGYF2	ENSG00000204120.16	CDS
chr17	8508615	8508652	-	0.99	3.766	MYH10	ENSG00000133026.14	CDS
chr8	19333042	19333119	+	0.96	3.766	SH2D4A	ENSG00000104611.12	CDS
chr15	76665698	76665763	-	0.98	3.766	SCAPER	ENSG00000140386.13	CDS
chr12	103943190	103943234	+	0.98	3.766	HSP90B1	ENSG00000166598.16	CDS
chr6	151350245	151350403	+	0.97	3.766	AKAP12	ENSG00000131016.17	CDS
chr10	1012466	1012490	+	0.99	3.765	GTPBP4	ENSG00000107937.19	CDS
chr4	2952303	2952319	-	0.99	3.765	NOP14	ENSG00000087269.16	CDS
chr1	205719527	205719594	-	0.98	3.765	NUCKS1	ENSG00000069275.13	CDS
chr17	8513532	8513544	-	0.99	3.764	MYH10	ENSG00000133026.14	CDS
chr2	179945592	179945654	-	0.99	3.763	CWC22	ENSG00000163510.14	CDS
chr20	31798396	31798446	+	0.98	3.762	TPX2	ENSG00000088325.16	CDS
chr2	231463290	231463302	-	0.97	3.762	NCL	ENSG00000115053.17	CDS
chr2	27383954	27383964	-	0.99	3.761	PPM1G	ENSG00000115241.11	CDS
chr20	34105420	34105429	-	0.99	3.761	EIF2S2	ENSG00000125977.7	CDS
chr20	41100055	41100122	+	0.98	3.761	TOP1	ENSG00000198900.7	CDS
chr5	72195997	72196042	+	0.97	3.761	MAP1B	ENSG00000131711.15	CDS
chr2	186495302	186495328	+	0.99	3.761	ZC3H15	ENSG00000065548.18	CDS
chrX	123621319	123621453	-	0.99	3.76	THOC2	ENSG00000125676.20	CDS
chr11	130121715	130121741	+	0.98	3.76	APLP2	ENSG00000084234.18	CDS
chr2	232844063	232844134	+	0.99	3.76	GIGYF2	ENSG00000204120.16	CDS
chr20	16379902	16380031	-	0.97	3.759	KIF16B	ENSG00000089177.19	CDS
chr3	37326993	37327115	+	0.95	3.759	GOLGA4	ENSG00000144674.18	CDS
chr20	49241904	49241946	+	0.99	3.759	DDX27	ENSG00000124228.15	CDS
chr16	89282851	89282938	-	0.99	3.759	ANKRD11	ENSG00000167522.17	CDS
chr6	151349875	151349932	+	0.98	3.759	AKAP12	ENSG00000131016.17	CDS
chr1	35190776	35190800	-	0.99	3.758	SFPQ	ENSG00000116560.12	CDS
chr15	41471171	41471175	+	0.98	3.758	RTF1	ENSG00000137815.15	CDS
chr4	41646506	41646575	+	0.99	3.758	LIMCH1	ENSG00000064042.18	CDS
chr12	6578913	6578917	-	0.99	3.757	CHD4	ENSG00000111642.16	CDS
chr14	21352777	21352787	-	0.98	3.757	SUPT16H	ENSG00000092201.10	CDS
chr10	27046351	27046358	-	0.99	3.757	ANKRD26	ENSG00000107890.17	CDS
chr5	34941100	34941125	+	0.98	3.757	DNAJC21	ENSG00000168724.18	CDS
chr12	103943238	103943245	+	0.98	3.757	HSP90B1	ENSG00000166598.16	CDS
chr3	143032782	143032805	+	0.99	3.757	U2SURP	ENSG00000163714.18	CDS
chr12	6578543	6578547	-	0.97	3.756	CHD4	ENSG00000111642.16	CDS
chr11	27889664	27889682	-	0.98	3.756	HSP90AA2P	ENSG00000224411.3	ncRNA
chr14	55656101	55656128	+	0.99	3.756	KTN1	ENSG00000126777.18	CDS
chr15	58894089	58894142	-	0.98	3.756	SLTM	ENSG00000137776.17	CDS
chr1	152314244	152314355	-	0.99	3.756	FLG	ENSG00000143631.11	CDS
chr12	79793897	79793929	-	0.99	3.755	PPP1R12A	ENSG00000058272.19	CDS
chr1	214647139	214647153	+	0.99	3.755	CENPF	ENSG00000117724.14	CDS
chr2	179945654	179945703	-	0.97	3.754	CWC22	ENSG00000163510.14	CDS
chr12	6770391	6770393	+	0.99	3.753	PTMS	ENSG00000159335.18	CDS
chr15	76702909	76703003	-	0.97	3.753	SCAPER	ENSG00000140386.13	CDS
chr12	95476149	95476157	+	0.99	3.753	METAP2	ENSG00000111142.14	CDS
chr10	119058209	119058265	-	0.99	3.753	EIF3A	ENSG00000107581.13	CDS
chr3	121694151	121694210	-	0.99	3.753	GOLGB1	ENSG00000173230.17	CDS
chr2	55334129	55334203	-	0.98	3.752	CCDC88A	ENSG00000115355.18	CDS
chr15	99259515	99259550	+	0.99	3.752	HSP90B2P	ENSG00000259706.1	ncRNA
chr7	105143199	105143272	-	0.98	3.752	SRPK2	ENSG00000135250.17	CDS
chr15	66499420	66499492	-	0.98	3.751	RPL4	ENSG00000174444.15	CDS
chr2	232816991	232817026	+	0.99	3.751	GIGYF2	ENSG00000204120.16	CDS
chr17	8506466	8506497	-	0.99	3.75	MYH10	ENSG00000133026.14	CDS
chr12	71644122	71644182	-	0.99	3.75	ZFC3H1	ENSG00000133858.17	CDS
chr12	71644257	71644316	-	0.99	3.75	ZFC3H1	ENSG00000133858.17	CDS
chr14	102083676	102083686	-	0.98	3.75	HSP90AA1	ENSG00000080824.19	CDS
chr2	99360484	99360546	+	0.98	3.748	EIF5B	ENSG00000158417.11	CDS
chr5	16702920	16702922	-	0.99	3.747	MYO10	ENSG00000145555.15	Intron
chr10	119058073	119058107	-	0.98	3.747	EIF3A	ENSG00000107581.13	CDS
chr11	130122302	130122323	+	0.98	3.746	APLP2	ENSG00000084234.18	CDS
chr9	15055860	15055924	+	0.98	3.745	PSIP1P1	ENSG00000234297.2	ncRNA
chr10	21904532	21904576	-	0.99	3.745	DNAJC1	ENSG00000136770.11	CDS
chr13	30463257	30463349	-	0.99	3.745	HMGB1	ENSG00000189403.15	CDS
chr5	71509950	71510022	+	0.99	3.745	BDP1	ENSG00000145734.20	CDS
chrX	81116329	81116338	-	0.99	3.745	HMGN5	ENSG00000198157.11	CDS
chr5	140705612	140705642	+	0.99	3.745	ZMAT2	ENSG00000146007.11	CDS
chr5	160406545	160406569	-	0.99	3.745	SLU7	ENSG00000164609.10	CDS
chr7	91992971	91993053	+	0.98	3.744	AKAP9	ENSG00000127914.19	CDS
chr2	99361543	99361572	+	0.97	3.744	EIF5B	ENSG00000158417.11	CDS
chr2	99361593	99361614	+	0.99	3.744	EIF5B	ENSG00000158417.11	CDS
chr14	102085848	102085864	-	0.98	3.743	HSP90AA1	ENSG00000080824.19	CDS
chr10	1012490	1012503	+	0.99	3.742	GTPBP4	ENSG00000107937.19	CDS
chr17	4671947	4671966	-	0.99	3.742	PELP1	ENSG00000141456.16	CDS
chr10	14521925	14521959	-	0.99	3.742	FAM107B	ENSG00000065809.14	CDS
chr20	31775906	31775943	+	0.98	3.741	TPX2	ENSG00000088325.16	CDS
chr5	34941162	34941185	+	0.98	3.741	DNAJC21	ENSG00000168724.18	CDS
chr21	46363479	46363532	+	0.97	3.741	PCNT	ENSG00000160299.19	CDS
chr14	102083227	102083271	-	0.99	3.741	HSP90AA1	ENSG00000080824.19	CDS
chr7	134928784	134928827	+	0.97	3.741	CALD1	ENSG00000122786.20	CDS
chr2	152618910	152618950	+	0.99	3.741	FMNL2	ENSG00000157827.20	CDS
chr4	13336956	13337000	+	0.99	3.739	HSP90AB2P	ENSG00000205940.8	ncRNA
chr4	87892753	87892793	+	0.99	3.739	HSP90AB3P	ENSG00000183199.6	ncRNA
chr5	163482692	163482717	+	0.99	3.739	HMMR	ENSG00000072571.20	CDS
chr9	35685548	35685551	-	0.98	3.738	TPM2	ENSG00000198467.16	CDS
chr1	77935821	77935907	+	0.99	3.738	NEXN	ENSG00000162614.19	CDS
chr5	150396600	150396678	+	0.96	3.738	TCOF1	ENSG00000070814.22	CDS
chr21	43686898	43686928	+	0.99	3.737	RRP1B	ENSG00000160208.13	CDS
chr9	15474101	15474127	-	0.99	3.736	PSIP1	ENSG00000164985.15	CDS
chr20	31798500	31798505	+	0.98	3.736	TPX2	ENSG00000088325.16	CDS
chr15	41457871	41457876	+	0.99	3.736	RTF1	ENSG00000137815.15	CDS
chr15	58888531	58888554	-	0.98	3.736	SLTM	ENSG00000137776.17	CDS
chr3	168024985	168025017	-	0.99	3.736	GOLIM4	ENSG00000173905.9	CDS
chr17	8499346	8499475	-	0.98	3.735	MYH10	ENSG00000133026.14	CDS
chr21	33797413	33797487	+	0.99	3.735	ITSN1	ENSG00000205726.15	CDS
chr20	41077633	41077637	+	0.99	3.735	TOP1	ENSG00000198900.7	CDS
chr1	145977974	145978043	+	0.99	3.735	POLR3GL	ENSG00000121851.13	CDS
chr1	186361621	186361626	-	0.99	3.735	TPR	ENSG00000047410.14	CDS
chr20	41076168	41076245	+	0.97	3.734	TOP1	ENSG00000198900.7	CDS
chr20	41533303	41533363	-	0.99	3.734	CHD6	ENSG00000124177.16	CDS
chr3	47701344	47701402	-	0.98	3.734	SMARCC1	ENSG00000173473.11	CDS
chr12	103943871	103943873	+	0.99	3.734	HSP90B1	ENSG00000166598.16	CDS
chr1	214622215	214622258	+	0.99	3.734	CENPF	ENSG00000117724.14	CDS
chr17	4672254	4672281	-	0.99	3.733	PELP1	ENSG00000141456.16	CDS
chr21	25976000	25976013	-	0.99	3.733	APP	ENSG00000142192.21	CDS
chr2	27384081	27384093	-	0.99	3.733	PPM1G	ENSG00000115241.11	CDS
chr1	35739469	35739529	-	0.98	3.733	CLSPN	ENSG00000092853.14	CDS
chr10	119049987	119049988	-	0.99	3.733	EIF3A	ENSG00000107581.13	Intron
chr1	171532473	171532480	+	0.98	3.733	PRRC2C	ENSG00000117523.18	CDS
chr14	55648801	55648803	+	0.99	3.731	KTN1	ENSG00000126777.18	CDS
chr4	77030853	77030903	+	0.99	3.731	SEPTIN11	ENSG00000138758.12	CDS
chr4	139376391	139376406	+	0.99	3.731	NAA15	ENSG00000164134.14	CDS
chr12	6578497	6578517	-	0.99	3.73	CHD4	ENSG00000111642.16	CDS
chr2	27383950	27383954	-	0.99	3.73	PPM1G	ENSG00000115241.11	CDS
chr14	55627910	55627948	+	0.97	3.73	KTN1	ENSG00000126777.18	CDS
chr11	66059271	66059296	+	0.99	3.73	SF3B2	ENSG00000087365.16	CDS
chr12	122327945	122327949	-	0.98	3.73	CLIP1	ENSG00000130779.22	CDS
chr8	19334770	19334819	+	0.98	3.729	SH2D4A	ENSG00000104611.12	CDS
chr7	92001193	92001277	+	0.98	3.728	AKAP9	ENSG00000127914.19	CDS
chr10	110589705	110589709	+	0.99	3.728	SMC3	ENSG00000108055.11	CDS
chr4	112647227	112647243	+	0.98	3.728	LARP7	ENSG00000174720.18	CDS
chr11	130121741	130121745	+	0.99	3.728	APLP2	ENSG00000084234.18	CDS
chr1	180054415	180054430	+	0.99	3.728	CEP350	ENSG00000135837.16	CDS
chr5	16701743	16701781	-	0.99	3.727	MYO10	ENSG00000145555.15	CDS
chr10	32028497	32028535	-	0.99	3.727	KIF5B	ENSG00000170759.11	CDS
chr17	48852917	48853012	+	0.98	3.727	CALCOCO2	ENSG00000136436.15	CDS
chr6	18237500	18237513	-	0.99	3.726	DEK	ENSG00000124795.17	CDS
chr14	55629959	55629978	+	0.97	3.726	KTN1	ENSG00000126777.18	CDS
chr12	6770158	6770172	+	0.99	3.725	PTMS	ENSG00000159335.18	CDS
chr6	44250313	44250320	+	0.99	3.725	HSP90AB1	ENSG00000096384.20	CDS
chr2	109564454	109564510	-	0.98	3.725	SEPTIN10	ENSG00000186522.15	CDS
chr11	110247701	110247723	-	0.99	3.725	RDX	ENSG00000137710.17	CDS
chr17	40628923	40628944	-	0.99	3.724	SMARCE1	ENSG00000073584.20	CDS
chr1	186343908	186343922	-	0.97	3.723	TPR	ENSG00000047410.14	CDS
chr8	38843342	38843368	+	0.98	3.722	TACC1	ENSG00000147526.20	CDS
chr3	47710717	47710734	-	0.98	3.722	SMARCC1	ENSG00000173473.11	CDS
chr1	171532516	171532524	+	0.98	3.722	PRRC2C	ENSG00000117523.18	CDS
chr6	18249653	18249670	-	0.99	3.721	DEK	ENSG00000124795.17	CDS
chr7	73476956	73477054	-	0.99	3.721	BAZ1B	ENSG00000009954.11	CDS
chr8	123371298	123371335	-	0.99	3.721	ATAD2	ENSG00000156802.13	CDS
chr5	163471365	163471421	+	0.99	3.721	HMMR	ENSG00000072571.20	CDS
chr6	4031665	4031726	+	0.99	3.72	PRPF4B	ENSG00000112739.17	CDS
chr17	50743705	50743711	+	0.98	3.72	LUC7L3	ENSG00000108848.16	CDS
chr14	73111034	73111055	+	0.97	3.72	RBM25	ENSG00000119707.14	CDS
chr7	105143136	105143199	-	0.99	3.72	SRPK2	ENSG00000135250.17	CDS
chr3	143050939	143051009	+	0.99	3.72	U2SURP	ENSG00000163714.18	CDS
chr19	45409293	45409459	+	0.99	3.719	POLR1G	ENSG00000117877.11	CDS
chr11	102111059	102111062	+	0.99	3.719	YAP1	ENSG00000137693.14	CDS
chr5	140704556	140704567	+	0.99	3.719	ZMAT2	ENSG00000146007.11	CDS
chr10	119042684	119042703	-	0.99	3.718	EIF3A	ENSG00000107581.13	CDS
chr8	123369171	123369175	-	0.98	3.718	ATAD2	ENSG00000156802.13	CDS
chr2	231463313	231463316	-	0.99	3.718	NCL	ENSG00000115053.17	CDS
chr2	101844263	101844307	+	0.99	3.717	MAP4K4	ENSG00000071054.17	CDS
chr11	27889654	27889664	-	0.99	3.716	HSP90AA2P	ENSG00000224411.3	ncRNA
chr21	33774726	33774823	+	0.98	3.716	ITSN1	ENSG00000205726.15	CDS
chr1	186344085	186344093	-	0.98	3.716	TPR	ENSG00000047410.14	CDS
chr11	110236099	110236191	-	0.99	3.715	RDX	ENSG00000137710.17	CDS
chr1	77916074	77916129	+	0.98	3.714	NEXN	ENSG00000162614.19	CDS
chr1	156595099	156595165	-	0.99	3.714	GPATCH4	ENSG00000160818.17	ncRNA
chr11	102111077	102111081	+	0.98	3.713	YAP1	ENSG00000137693.14	CDS
chr1	35751249	35751302	-	0.99	3.712	CLSPN	ENSG00000092853.14	CDS
chr14	73103346	73103411	+	0.99	3.712	RBM25	ENSG00000119707.14	CDS
chr1	150226721	150226744	-	0.98	3.712	ANP32E	ENSG00000143401.15	CDS
chr1	209828032	209828125	+	0.98	3.712	UTP25	ENSG00000117597.18	CDS
chr6	30571544	30571560	+	0.98	3.711	ABCF1	ENSG00000204574.14	CDS
chr1	205723945	205723961	-	0.99	3.711	NUCKS1	ENSG00000069275.13	CDS
chr14	21352815	21352818	-	0.99	3.71	SUPT16H	ENSG00000092201.10	CDS
chrX	77682006	77682069	-	0.99	3.71	ATRX	ENSG00000085224.23	CDS
chr11	102111069	102111077	+	0.97	3.71	YAP1	ENSG00000137693.14	CDS
chr8	123371669	123371752	-	0.98	3.71	ATAD2	ENSG00000156802.13	CDS
chr11	126067937	126067948	+	0.99	3.71	NAP1L1P1	ENSG00000254759.1	ncRNA
chr19	2114212	2114281	-	0.99	3.708	AP3D1	ENSG00000065000.20	CDS
chr17	8506316	8506382	-	0.98	3.708	MYH10	ENSG00000133026.14	CDS
chr11	27340722	27340838	-	0.99	3.708	CCDC34	ENSG00000109881.17	CDS
chr20	31783809	31783863	+	0.99	3.708	TPX2	ENSG00000088325.16	CDS
chr14	55648112	55648115	+	0.98	3.708	KTN1	ENSG00000126777.18	CDS
chr8	67112056	67112067	+	0.98	3.708	CSPP1	ENSG00000104218.16	CDS
chr12	103941502	103941529	+	0.99	3.708	HSP90B1	ENSG00000166598.16	CDS
chr15	41457828	41457871	+	0.97	3.707	RTF1	ENSG00000137815.15	CDS
chr14	55633263	55633273	+	0.98	3.707	KTN1	ENSG00000126777.18	CDS
chr3	185417812	185417911	-	0.99	3.707	RPL4P4	ENSG00000229638.1	ncRNA
chr15	57453712	57453788	+	0.97	3.706	CGNL1	ENSG00000128849.11	CDS
chr11	102111062	102111069	+	0.99	3.706	YAP1	ENSG00000137693.14	CDS
chr1	214639963	214639988	+	0.98	3.706	CENPF	ENSG00000117724.14	CDS
chr12	6578533	6578543	-	0.98	3.705	CHD4	ENSG00000111642.16	CDS
chr20	31775877	31775906	+	0.97	3.705	TPX2	ENSG00000088325.16	CDS
chr2	101856053	101856085	+	0.99	3.705	MAP4K4	ENSG00000071054.17	CDS
chr6	151349680	151349724	+	0.99	3.705	AKAP12	ENSG00000131016.17	CDS
chr3	168032535	168032586	-	0.98	3.705	GOLIM4	ENSG00000173905.9	CDS
chr17	8492964	8492983	-	0.99	3.704	MYH10	ENSG00000133026.14	CDS
chr4	77030789	77030853	+	0.98	3.704	SEPTIN11	ENSG00000138758.12	CDS
chr8	123369146	123369171	-	0.98	3.704	ATAD2	ENSG00000156802.13	CDS
chr8	123369820	123369844	-	0.99	3.704	ATAD2	ENSG00000156802.13	CDS
chr13	19647047	19647126	+	0.98	3.703	MPHOSPH8	ENSG00000196199.14	CDS
chrX	53405907	53405950	-	0.98	3.703	SMC1A	ENSG00000072501.19	CDS
chr14	55616516	55616541	+	0.98	3.703	KTN1	ENSG00000126777.18	CDS
chr12	76056147	76056164	-	0.98	3.703	NAP1L1	ENSG00000187109.15	CDS
chr6	44426130	44426182	+	0.99	3.702	CDC5L	ENSG00000096401.8	CDS
chr8	91070329	91070372	+	0.99	3.702	OTUD6B	ENSG00000155100.11	CDS
chr12	103943274	103943279	+	0.99	3.702	HSP90B1	ENSG00000166598.16	CDS
chr21	25976013	25976028	-	0.98	3.701	APP	ENSG00000142192.21	CDS
chr6	44250087	44250112	+	0.99	3.701	HSP90AB1	ENSG00000096384.20	CDS
chr5	140704567	140704571	+	0.99	3.701	ZMAT2	ENSG00000146007.11	CDS
chr12	6578517	6578527	-	0.99	3.7	CHD4	ENSG00000111642.16	CDS
chr12	95485948	95485972	+	0.97	3.7	METAP2	ENSG00000111142.14	CDS
chr2	152618950	152619006	+	0.98	3.7	FMNL2	ENSG00000157827.20	CDS
chr2	231463302	231463313	-	0.99	3.7	NCL	ENSG00000115053.17	CDS
chr16	11839874	11839894	-	0.99	3.699	RSL1D1	ENSG00000171490.13	CDS
chr2	99337578	99337588	+	0.99	3.699	EIF5B	ENSG00000158417.11	CDS
chr16	89283454	89283522	-	0.99	3.698	ANKRD11	ENSG00000167522.17	CDS
chr10	104002367	104002461	+	0.99	3.698	SLK	ENSG00000065613.15	CDS
chr5	163475549	163475565	+	0.99	3.698	HMMR	ENSG00000072571.20	CDS
chr17	63820077	63820173	-	0.98	3.697	FTSJ3	ENSG00000108592.17	CDS
chr17	16121243	16121269	-	0.98	3.696	NCOR1	ENSG00000141027.22	CDS
chr9	35685654	35685691	-	0.97	3.696	TPM2	ENSG00000198467.16	CDS
chr7	73477794	73477834	-	0.96	3.696	BAZ1B	ENSG00000009954.11	CDS
chr14	102083907	102083964	-	0.99	3.696	HSP90AA1	ENSG00000080824.19	CDS
chr7	107926276	107926362	-	0.99	3.696	LAMB1	ENSG00000091136.15	CDS
chr5	140659024	140659065	+	0.98	3.696	IK	ENSG00000113141.19	CDS
chr14	55656081	55656101	+	0.99	3.695	KTN1	ENSG00000126777.18	CDS
chr6	78982972	78983038	-	0.98	3.695	PHIP	ENSG00000146247.15	CDS
chr7	73477719	73477759	-	0.98	3.694	BAZ1B	ENSG00000009954.11	CDS
chr17	16121224	16121243	-	0.97	3.693	NCOR1	ENSG00000141027.22	CDS
chrX	53412899	53412917	-	0.99	3.693	SMC1A	ENSG00000072501.19	CDS
chr2	99369453	99369456	+	0.97	3.693	EIF5B	ENSG00000158417.11	CDS
chr17	4672305	4672318	-	0.99	3.689	PELP1	ENSG00000141456.16	CDS
chr8	43002107	43002135	+	0.99	3.689	HOOK3	ENSG00000168172.9	CDS
chr14	55672928	55672945	+	0.99	3.689	KTN1	ENSG00000126777.18	CDS
chr14	73109448	73109494	+	0.96	3.689	RBM25	ENSG00000119707.14	CDS
chr1	214637868	214637891	+	0.99	3.689	CENPF	ENSG00000117724.14	CDS
chr10	104001547	104001573	+	0.99	3.688	SLK	ENSG00000065613.15	CDS
chr11	120465234	120465275	+	0.98	3.688	ARHGEF12	ENSG00000196914.9	CDS
chr2	232832971	232833050	+	0.99	3.688	GIGYF2	ENSG00000204120.16	CDS
chr1	25228995	25229112	-	0.97	3.687	SYF2	ENSG00000117614.10	CDS
chr15	56444641	56444671	-	0.98	3.687	MNS1	ENSG00000138587.6	CDS
chr4	86807640	86807684	+	0.98	3.687	PTPN13	ENSG00000163629.13	CDS
chr2	11201308	11201331	-	0.98	3.686	ROCK2	ENSG00000134318.16	CDS
chr20	41098214	41098217	+	0.98	3.686	TOP1	ENSG00000198900.7	CDS
chr4	13608527	13608580	-	0.99	3.685	BOD1L1	ENSG00000038219.13	CDS
chr14	55634655	55634659	+	0.98	3.685	KTN1	ENSG00000126777.18	CDS
chr15	64950969	64950975	-	0.99	3.685	ENSG00000274383	ENSG00000274383.1	ncRNA
chr12	122517347	122517431	-	0.99	3.685	RSRC2	ENSG00000111011.18	CDS
chr20	41080088	41080142	+	0.98	3.684	TOP1	ENSG00000198900.7	CDS
chr16	57172255	57172328	-	0.98	3.684	PSME3IP1	ENSG00000172775.17	CDS
chr17	16126080	16126125	-	0.99	3.683	NCOR1	ENSG00000141027.22	CDS
chr1	227411102	227411180	-	0.97	3.683	NUCKS1P1	ENSG00000232864.1	ncRNA
chr6	44252191	44252195	+	0.99	3.682	HSP90AB1	ENSG00000096384.20	CDS
chr15	56443480	56443520	-	0.96	3.682	MNS1	ENSG00000138587.6	CDS
chr14	102083053	102083087	-	0.98	3.682	HSP90AA1	ENSG00000080824.19	CDS
chr14	102083634	102083641	-	0.99	3.682	HSP90AA1	ENSG00000080824.19	CDS
chr12	103943245	103943248	+	0.97	3.682	HSP90B1	ENSG00000166598.16	CDS
chr5	132609134	132609210	+	0.99	3.682	RAD50|ENSG00000283782	ENSG00000283782.2||ENSG00000113522.14	CDS
chr6	4031922	4031948	+	0.99	3.681	PRPF4B	ENSG00000112739.17	CDS
chr2	11211801	11211832	-	0.98	3.681	ROCK2	ENSG00000134318.16	CDS
chr20	34097503	34097511	-	0.99	3.681	EIF2S2	ENSG00000125977.7	CDS
chr10	68959827	68959863	+	0.99	3.681	DDX21	ENSG00000165732.14	CDS
chr1	77926482	77926516	+	0.99	3.681	NEXN	ENSG00000162614.19	CDS
chr9	98012422	98012447	+	0.98	3.681	ANP32B	ENSG00000136938.9	CDS
chr8	123372636	123372638	-	0.98	3.681	ATAD2	ENSG00000156802.13	CDS
chr1	150220737	150220762	-	0.96	3.681	ANP32E	ENSG00000143401.15	CDS
chr1	171532820	171532907	+	0.99	3.681	PRRC2C	ENSG00000117523.18	CDS
chr19	10162711	10162749	-	0.99	3.68	DNMT1	ENSG00000130816.17	CDS
chr8	22247853	22248011	+	0.99	3.68	POLR3D	ENSG00000168495.13	CDS
chr6	30671118	30671201	-	0.98	3.68	DHX16	ENSG00000204560.10	CDS
chrX	53411765	53411778	-	0.98	3.68	SMC1A	ENSG00000072501.19	CDS
chr6	75890234	75890245	+	0.98	3.68	MYO6	ENSG00000196586.17	CDS
chr12	103943248	103943253	+	0.98	3.68	HSP90B1	ENSG00000166598.16	CDS
chr4	87892793	87892833	+	0.97	3.679	HSP90AB3P	ENSG00000183199.6	ncRNA
chr10	100917089	100917157	+	0.98	3.679	SLF2	ENSG00000119906.13	CDS
chr2	135770573	135770643	+	0.98	3.679	UBXN4	ENSG00000144224.17	CDS
chr14	55648102	55648112	+	0.98	3.678	KTN1	ENSG00000126777.18	CDS
chr14	91384464	91384479	-	0.99	3.678	CCDC88C	ENSG00000015133.20	Intron
chr1	35739401	35739431	-	0.98	3.677	CLSPN	ENSG00000092853.14	CDS
chrX	53405244	53405352	-	0.99	3.677	SMC1A	ENSG00000072501.19	CDS
chr2	232816869	232816890	+	0.99	3.677	GIGYF2	ENSG00000204120.16	CDS
chr10	42792958	42793023	+	0.98	3.676	BMS1	ENSG00000165733.8	CDS
chr1	205723961	205723978	-	0.99	3.676	NUCKS1	ENSG00000069275.13	CDS
chr1	35189051	35189069	-	0.99	3.675	SFPQ	ENSG00000116560.12	CDS
chr2	152672993	152673045	-	0.98	3.675	PRPF40A	ENSG00000196504.21	CDS
chr10	14521959	14522025	-	0.99	3.674	FAM107B	ENSG00000065809.14	CDS
chr2	62831041	62831141	+	0.98	3.674	EHBP1	ENSG00000115504.15	CDS
chr16	89283211	89283315	-	0.98	3.674	ANKRD11	ENSG00000167522.17	CDS
chr17	20204349	20204356	+	0.99	3.673	SPECC1	ENSG00000128487.19	CDS
chr20	31793947	31793976	+	0.98	3.673	TPX2	ENSG00000088325.16	CDS
chr20	49223266	49223278	+	0.99	3.673	DDX27	ENSG00000124228.15	CDS
chrX	77652169	77652194	-	0.99	3.673	ATRX	ENSG00000085224.23	CDS
chrX	77663483	77663559	-	0.99	3.673	ATRX	ENSG00000085224.23	CDS
chr4	78181542	78181621	-	0.99	3.673	SERBP1P5	ENSG00000249565.2	ncRNA
chr3	185245971	185246017	-	0.97	3.673	EIF2S2P2	ENSG00000229704.1	ncRNA
chr14	73110990	73111008	+	0.99	3.672	RBM25	ENSG00000119707.14	CDS
chr7	73489230	73489300	-	0.99	3.672	BAZ1B	ENSG00000009954.11	CDS
chr17	50744715	50744751	+	0.99	3.671	LUC7L3	ENSG00000108848.16	CDS
chr4	139370238	139370308	+	0.98	3.671	NAA15	ENSG00000164134.14	CDS
chr15	56434194	56434261	-	0.98	3.67	MNS1	ENSG00000138587.6	CDS
chr12	103943269	103943274	+	0.98	3.67	HSP90B1	ENSG00000166598.16	CDS
chr10	119058136	119058157	-	0.99	3.67	EIF3A	ENSG00000107581.13	CDS
chr6	151349552	151349652	+	0.97	3.67	AKAP12	ENSG00000131016.17	CDS
chr4	189473506	189473536	+	0.96	3.67	HSP90AA4P	ENSG00000205100.2	ncRNA
chr17	8506437	8506466	-	0.99	3.669	MYH10	ENSG00000133026.14	CDS
chr13	32770307	32770407	+	0.98	3.669	PDS5B	ENSG00000083642.19	CDS
chr2	101855975	101855985	+	0.97	3.669	MAP4K4	ENSG00000071054.17	CDS
chr1	205727737	205727766	-	0.97	3.669	NUCKS1	ENSG00000069275.13	CDS
chr17	8506424	8506437	-	0.98	3.668	MYH10	ENSG00000133026.14	CDS
chr12	103943256	103943269	+	0.99	3.668	HSP90B1	ENSG00000166598.16	CDS
chr10	1017159	1017169	+	0.98	3.667	GTPBP4	ENSG00000107937.19	CDS
chr6	52267891	52267905	-	0.99	3.667	MCM3	ENSG00000112118.20	CDS
chr14	60812007	60812050	+	0.98	3.667	MNAT1	ENSG00000020426.11	CDS
chr12	95485972	95485978	+	0.99	3.667	METAP2	ENSG00000111142.14	CDS
chr1	171532480	171532487	+	0.99	3.667	PRRC2C	ENSG00000117523.18	CDS
chr17	28674282	28674288	+	0.98	3.666	SUPT6H	ENSG00000109111.15	CDS
chr2	99379018	99379033	+	0.98	3.666	EIF5B	ENSG00000158417.11	CDS
chrX	53411832	53411858	-	0.99	3.665	SMC1A	ENSG00000072501.19	CDS
chr12	108526549	108526554	-	0.98	3.665	SART3	ENSG00000075856.12	CDS
chr3	168029849	168029888	-	0.99	3.665	GOLIM4	ENSG00000173905.9	CDS
chr12	1236807	1236839	+	0.98	3.664	ERC1	ENSG00000082805.21	CDS
chr14	55637779	55637780	+	0.98	3.664	KTN1	ENSG00000126777.18	CDS
chr7	134933186	134933258	+	0.98	3.664	CALD1	ENSG00000122786.20	CDS
chr17	8513544	8513610	-	0.99	3.663	MYH10	ENSG00000133026.14	CDS
chr10	42796531	42796560	+	0.98	3.663	BMS1	ENSG00000165733.8	CDS
chr2	99360318	99360357	+	0.98	3.663	EIF5B	ENSG00000158417.11	CDS
chr1	35188005	35188030	-	0.99	3.662	SFPQ	ENSG00000116560.12	CDS
chr1	43164446	43164494	-	0.99	3.662	EBNA1BP2	ENSG00000117395.13	CDS
chr9	98011320	98011339	+	0.99	3.662	ANP32B	ENSG00000136938.9	CDS
chr2	169811270	169811327	+	0.99	3.662	SSB	ENSG00000138385.16	CDS
chr11	110247723	110247766	-	0.97	3.661	RDX	ENSG00000137710.17	CDS
chr12	103943288	103943298	+	0.99	3.66	HSP90B1	ENSG00000166598.16	CDS
chr5	132608649	132608724	+	0.99	3.66	ENSG00000283782|RAD50	ENSG00000113522.14||ENSG00000283782.2	CDS
chr17	4672467	4672501	-	0.98	3.659	PELP1	ENSG00000141456.16	CDS
chr20	54219034	54219068	+	0.97	3.659	PFDN4	ENSG00000101132.10	CDS
chrX	136509091	136509140	+	0.99	3.659	HTATSF1	ENSG00000102241.12	CDS
chr2	24298660	24298722	-	0.98	3.658	ITSN2	ENSG00000198399.16	CDS
chr15	56443637	56443653	-	0.99	3.658	MNS1	ENSG00000138587.6	CDS
chr8	123371793	123371832	-	0.99	3.658	ATAD2	ENSG00000156802.13	CDS
chr1	186343325	186343372	-	0.98	3.658	TPR	ENSG00000047410.14	CDS
chr15	57452140	57452147	+	0.98	3.657	CGNL1	ENSG00000128849.11	CDS
chr12	122334647	122334664	-	0.98	3.657	CLIP1	ENSG00000130779.22	CDS
chr1	145978067	145978098	+	0.97	3.657	POLR3GL	ENSG00000121851.13	CDS
chr9	17466019	17466111	+	0.99	3.656	CNTLN	ENSG00000044459.15	CDS
chr2	101856085	101856131	+	0.99	3.656	MAP4K4	ENSG00000071054.17	CDS
chr5	140658940	140659024	+	0.97	3.656	IK	ENSG00000113141.19	CDS
chr2	171690150	171690255	+	0.99	3.656	DYNC1I2	ENSG00000077380.16	CDS
chr2	232816913	232816959	+	0.99	3.656	GIGYF2	ENSG00000204120.16	CDS
chr12	6581043	6581065	-	0.99	3.655	CHD4	ENSG00000111642.16	CDS
chr2	27383964	27383988	-	0.98	3.655	PPM1G	ENSG00000115241.11	CDS
chr15	43813251	43813315	-	0.99	3.655	MFAP1	ENSG00000140259.7	CDS
chr15	58912562	58912578	-	0.98	3.655	SLTM	ENSG00000137776.17	CDS
chr5	72194990	72195027	+	0.99	3.655	MAP1B	ENSG00000131711.15	CDS
chr16	89282418	89282464	-	0.98	3.655	ANKRD11	ENSG00000167522.17	CDS
chr3	185246017	185246032	-	0.98	3.655	EIF2S2P2	ENSG00000229704.1	ncRNA
chr4	77030903	77030968	+	0.99	3.654	SEPTIN11	ENSG00000138758.12	CDS
chr10	119058001	119058016	-	0.98	3.654	EIF3A	ENSG00000107581.13	CDS
chr10	119049938	119049943	-	0.97	3.653	EIF3A	ENSG00000107581.13	CDS
chr10	32022249	32022257	-	0.99	3.652	KIF5B	ENSG00000170759.11	CDS
chr14	55612488	55612536	+	0.98	3.652	KTN1	ENSG00000126777.18	CDS
chr14	55627948	55627959	+	0.98	3.652	KTN1	ENSG00000126777.18	CDS
chr4	173332162	173332176	-	0.99	3.652	HMGB2	ENSG00000164104.12	CDS
chr14	21363033	21363077	-	0.98	3.651	SUPT16H	ENSG00000092201.10	CDS
chr21	33549523	33549571	+	0.97	3.651	SON	ENSG00000159140.22	CDS
chr14	55630007	55630051	+	0.98	3.65	KTN1	ENSG00000126777.18	CDS
chr12	92819354	92819426	-	0.99	3.65	EEA1	ENSG00000102189.17	CDS
chrX	123621229	123621319	-	0.99	3.65	THOC2	ENSG00000125676.20	CDS
chr10	11943098	11943129	-	0.99	3.649	UPF2	ENSG00000151461.20	CDS
chr8	61643941	61643965	-	0.99	3.649	ASPH	ENSG00000198363.18	CDS
chr1	155765088	155765172	-	0.97	3.649	GON4L	ENSG00000116580.20	CDS
chr2	58460705	58460740	-	0.98	3.648	ENSG00000231043	ENSG00000231043.3	ncRNA
chr12	95485978	95485981	+	0.99	3.648	METAP2	ENSG00000111142.14	CDS
chrX	53411799	53411832	-	0.99	3.647	SMC1A	ENSG00000072501.19	CDS
chr1	205718310	205718389	-	0.97	3.647	NUCKS1	ENSG00000069275.13	CDS
chr6	52267872	52267891	-	0.99	3.645	MCM3	ENSG00000112118.20	CDS
chr12	103943279	103943288	+	0.99	3.645	HSP90B1	ENSG00000166598.16	CDS
chr5	146126513	146126548	-	0.99	3.645	LARS1	ENSG00000133706.19	CDS
chrX	81118730	81118733	-	0.99	3.644	HMGN5	ENSG00000198157.11	CDS
chr20	13759744	13759754	-	0.99	3.643	ESF1	ENSG00000089048.15	CDS
chr14	23059396	23059436	-	0.99	3.643	ACIN1	ENSG00000100813.15	CDS
chr6	75891274	75891307	+	0.99	3.643	MYO6	ENSG00000196586.17	CDS
chr6	89658788	89658917	-	0.99	3.643	MDN1	ENSG00000112159.13	CDS
chr12	6602025	6602046	-	0.97	3.642	CHD4	ENSG00000111642.16	CDS
chr10	32021261	32021284	-	0.99	3.642	KIF5B	ENSG00000170759.11	CDS
chr21	32602341	32602369	-	0.97	3.642	CFAP298-TCP10L|CFAP298	ENSG00000159079.19||ENSG00000265590.10	CDS
chr17	67903831	67903849	+	0.98	3.642	BPTF	ENSG00000171634.19	CDS
chr14	73111073	73111095	+	0.99	3.641	RBM25	ENSG00000119707.14	CDS
chr8	123380528	123380595	-	0.99	3.641	ATAD2	ENSG00000156802.13	CDS
chr1	205749959	205749986	-	0.99	3.641	NUCKS1	ENSG00000069275.13	CDS
chr17	28674288	28674333	+	0.98	3.64	SUPT6H	ENSG00000109111.15	CDS
chr5	163483294	163483304	+	0.99	3.64	HMMR	ENSG00000072571.20	CDS
chr17	40628944	40628960	-	0.99	3.639	SMARCE1	ENSG00000073584.20	CDS
chr11	62148750	62148807	+	0.99	3.639	INCENP	ENSG00000149503.13	CDS
chr6	89662883	89662938	-	0.99	3.639	MDN1	ENSG00000112159.13	CDS
chr12	122341014	122341109	-	0.98	3.639	CLIP1	ENSG00000130779.22	CDS
chr3	168024928	168024963	-	0.98	3.639	GOLIM4	ENSG00000173905.9	CDS
chr6	89658208	89658322	-	0.98	3.638	MDN1	ENSG00000112159.13	CDS
chr14	21363330	21363336	-	0.99	3.637	SUPT16H	ENSG00000092201.10	Intron
chr6	44250290	44250313	+	0.99	3.637	HSP90AB1	ENSG00000096384.20	CDS
chr14	55616541	55616569	+	0.98	3.637	KTN1	ENSG00000126777.18	CDS
chr14	58096791	58096950	-	0.96	3.637	ARMH4	ENSG00000139971.15	CDS
chr6	44247136	44247140	+	0.99	3.636	HSP90AB1	ENSG00000096384.20	5' UTR
chr2	58461445	58461504	-	0.99	3.635	ENSG00000231043	ENSG00000231043.3	ncRNA
chr3	100160437	100160509	+	0.98	3.635	CMSS1	ENSG00000184220.12	CDS
chr11	130122323	130122344	+	0.99	3.635	APLP2	ENSG00000084234.18	CDS
chr19	2112859	2112862	-	0.99	3.634	AP3D1	ENSG00000065000.20	CDS
chr2	27383596	27383600	-	0.97	3.634	PPM1G	ENSG00000115241.11	CDS
chr1	37568273	37568292	-	0.99	3.633	GNL2	ENSG00000134697.13	CDS
chr1	154183097	154183197	-	0.98	3.632	TPM3	ENSG00000143549.21	CDS
chr2	186502522	186502586	+	0.96	3.631	ZC3H15	ENSG00000065548.18	CDS
chr1	205750127	205750174	-	0.97	3.631	NUCKS1	ENSG00000069275.13	5' UTR
chr10	11943129	11943163	-	0.98	3.63	UPF2	ENSG00000151461.20	CDS
chr2	159382557	159382675	-	0.98	3.63	BAZ2B	ENSG00000123636.19	CDS
chr1	222652299	222652333	+	0.98	3.63	MIA3	ENSG00000154305.18	CDS
chr4	13604810	13604889	-	0.98	3.629	BOD1L1	ENSG00000038219.13	CDS
chr1	24671385	24671456	+	0.99	3.629	SRRM1	ENSG00000133226.18	CDS
chr3	37327115	37327178	+	0.99	3.629	GOLGA4	ENSG00000144674.18	CDS
chr11	66063477	66063521	+	0.99	3.629	SF3B2	ENSG00000087365.16	CDS
chr14	60811980	60812007	+	0.99	3.628	MNAT1	ENSG00000020426.11	CDS
chr10	68960172	68960190	+	0.97	3.628	DDX21	ENSG00000165732.14	CDS
chr9	128693638	128693703	+	0.99	3.628	SET	ENSG00000119335.18	CDS
chr11	130122430	130122457	+	0.98	3.628	APLP2	ENSG00000084234.18	CDS
chr17	20227539	20227622	+	0.99	3.627	SPECC1	ENSG00000128487.19	CDS
chr10	32022847	32022850	-	0.98	3.627	KIF5B	ENSG00000170759.11	CDS
chr12	16400745	16400777	-	0.99	3.626	SUPT16HP1	ENSG00000256238.1	ncRNA
chr14	55641139	55641160	+	0.98	3.626	KTN1	ENSG00000126777.18	CDS
chr16	89282327	89282418	-	0.99	3.626	ANKRD11	ENSG00000167522.17	CDS
chr19	10163324	10163361	-	0.99	3.625	DNMT1	ENSG00000130816.17	CDS
chr14	21353529	21353565	-	0.98	3.625	SUPT16H	ENSG00000092201.10	CDS
chr21	33549571	33549610	+	0.99	3.625	SON	ENSG00000159140.22	CDS
chr11	130122296	130122302	+	0.99	3.625	APLP2	ENSG00000084234.18	Intron
chr11	10774118	10774171	+	0.99	3.624	CTR9	ENSG00000198730.9	CDS
chrX	53409105	53409171	-	0.98	3.624	SMC1A	ENSG00000072501.19	CDS
chr3	37327687	37327788	+	0.99	3.623	GOLGA4	ENSG00000144674.18	CDS
chr21	43687521	43687539	+	0.99	3.623	RRP1B	ENSG00000160208.13	CDS
chr15	55466990	55467103	-	0.97	3.623	DNAAF4	ENSG00000256061.7	CDS
chr9	98015618	98015642	+	0.99	3.623	ANP32B	ENSG00000136938.9	3' UTR
chr9	128693935	128694030	+	0.99	3.623	SET	ENSG00000119335.18	CDS
chr6	136261297	136261338	-	0.98	3.623	BCLAF1	ENSG00000029363.17	CDS
chr10	1012461	1012466	+	0.98	3.622	GTPBP4	ENSG00000107937.19	CDS
chr10	102160992	102161064	+	0.98	3.622	NOLC1	ENSG00000166197.17	CDS
chr1	214640054	214640066	+	0.99	3.622	CENPF	ENSG00000117724.14	CDS
chr20	17614772	17614791	-	0.99	3.621	RRBP1	ENSG00000125844.17	CDS
chr16	24572299	24572361	+	0.98	3.621	RBBP6	ENSG00000122257.20	CDS
chr11	66067964	66067972	+	0.98	3.621	SF3B2	ENSG00000087365.16	CDS
chr10	68761116	68761149	+	0.98	3.621	CCAR1	ENSG00000060339.14	CDS
chr1	205723978	205723984	-	0.97	3.621	NUCKS1	ENSG00000069275.13	CDS
chr5	32395154	32395182	-	0.99	3.62	ZFR	ENSG00000056097.16	CDS
chr12	103942571	103942593	+	0.99	3.62	HSP90B1	ENSG00000166598.16	CDS
chr1	205727800	205727806	-	0.98	3.62	NUCKS1	ENSG00000069275.13	CDS
chr12	1236839	1236906	+	0.98	3.619	ERC1	ENSG00000082805.21	CDS
chr12	6602046	6602083	-	0.98	3.619	CHD4	ENSG00000111642.16	CDS
chr12	6581303	6581346	-	0.97	3.618	CHD4	ENSG00000111642.16	CDS
chr10	12001715	12001756	-	0.99	3.618	UPF2	ENSG00000151461.20	CDS
chr3	47710686	47710704	-	0.98	3.618	SMARCC1	ENSG00000173473.11	CDS
chr6	135465927	135466194	-	0.96	3.618	AHI1	ENSG00000135541.22	CDS
chr1	171535457	171535481	+	0.97	3.618	PRRC2C	ENSG00000117523.18	CDS
chr15	57523494	57523524	+	0.96	3.617	CGNL1	ENSG00000128849.11	CDS
chr14	92005118	92005266	-	0.97	3.617	TRIP11	ENSG00000100815.12	CDS
chr4	103145065	103145135	-	0.99	3.617	CENPE	ENSG00000138778.14	CDS
chr10	119058107	119058116	-	0.98	3.617	EIF3A	ENSG00000107581.13	CDS
chr1	35188030	35188035	-	0.99	3.616	SFPQ	ENSG00000116560.12	CDS
chr1	35189004	35189051	-	0.98	3.616	SFPQ	ENSG00000116560.12	CDS
chr14	55618054	55618114	+	0.98	3.616	KTN1	ENSG00000126777.18	CDS
chr8	116850677	116850707	-	0.98	3.616	RAD21	ENSG00000164754.16	CDS
chr12	6602083	6602108	-	0.99	3.615	CHD4	ENSG00000111642.16	CDS
chr12	6770393	6770426	+	0.98	3.615	PTMS	ENSG00000159335.18	CDS
chr1	35187988	35188005	-	0.98	3.615	SFPQ	ENSG00000116560.12	CDS
chr2	101844307	101844311	+	0.97	3.614	MAP4K4	ENSG00000071054.17	CDS
chr8	116848963	116848986	-	0.99	3.614	RAD21	ENSG00000164754.16	CDS
chr3	121694697	121694825	-	0.98	3.614	GOLGB1	ENSG00000173230.17	CDS
chr11	57327459	57327515	-	0.99	3.612	SSRP1	ENSG00000149136.9	CDS
chr17	4672035	4672115	-	0.98	3.611	PELP1	ENSG00000141456.16	CDS
chr2	27386241	27386279	-	0.97	3.611	PPM1G	ENSG00000115241.11	CDS
chr8	38843286	38843290	+	0.98	3.611	TACC1	ENSG00000147526.20	CDS
chr9	97330322	97330544	+	0.98	3.611	CCDC180	ENSG00000197816.16	CDS
chr2	152664213	152664252	-	0.99	3.611	PRPF40A	ENSG00000196504.21	CDS
chr2	179965880	179965978	-	0.98	3.611	CWC22	ENSG00000163510.14	CDS
chr2	231460272	231460290	-	0.98	3.611	NCL	ENSG00000115053.17	CDS
chr9	15469288	15469336	-	0.99	3.61	PSIP1	ENSG00000164985.15	CDS
chr14	73111008	73111034	+	0.99	3.61	RBM25	ENSG00000119707.14	CDS
chr6	75892527	75892585	+	0.98	3.61	MYO6	ENSG00000196586.17	CDS
chr4	4274413	4274424	-	0.97	3.609	LYAR	ENSG00000145220.14	CDS
chr17	8508552	8508555	-	0.99	3.609	MYH10	ENSG00000133026.14	CDS
chr3	196487443	196487526	-	0.98	3.609	RNF168	ENSG00000163961.4	CDS
chr9	35689209	35689239	-	0.99	3.608	TPM2	ENSG00000198467.16	CDS
chr12	76056118	76056138	-	0.97	3.608	NAP1L1	ENSG00000187109.15	CDS
chr12	95485930	95485948	+	0.98	3.608	METAP2	ENSG00000111142.14	CDS
chr14	102085428	102085431	-	0.97	3.608	HSP90AA1	ENSG00000080824.19	CDS
chr12	103943298	103943319	+	0.99	3.608	HSP90B1	ENSG00000166598.16	CDS
chr3	112638236	112638309	-	0.96	3.608	CCDC80	ENSG00000091986.16	CDS
chrX	53413015	53413064	-	0.99	3.607	SMC1A	ENSG00000072501.19	CDS
chr15	58913498	58913550	-	0.99	3.607	SLTM	ENSG00000137776.17	CDS
chr17	67866462	67866541	+	0.99	3.607	BPTF	ENSG00000171634.19	CDS
chr1	214619180	214619200	+	0.99	3.607	CENPF	ENSG00000117724.14	CDS
chr21	43686928	43686936	+	0.99	3.606	RRP1B	ENSG00000160208.13	CDS
chr17	8506398	8506424	-	0.99	3.605	MYH10	ENSG00000133026.14	CDS
chr1	77935930	77936000	+	0.97	3.605	NEXN	ENSG00000162614.19	CDS
chrX	136511924	136511984	+	0.941	3.605	HTATSF1	ENSG00000102241.12	CDS
chr11	17295370	17295428	+	0.97	3.604	NUCB2	ENSG00000070081.18	CDS
chr14	55627983	55628006	+	0.98	3.604	KTN1	ENSG00000126777.18	CDS
chr4	139370308	139370336	+	0.99	3.604	NAA15	ENSG00000164134.14	CDS
chr12	39342108	39342125	-	0.98	3.603	KIF21A	ENSG00000139116.19	CDS
chr12	55803664	55803729	-	0.99	3.603	ENSG00000257390|SARNP	ENSG00000205323.9||ENSG00000257390.5	CDS
chr12	79793889	79793897	-	0.97	3.603	PPP1R12A	ENSG00000058272.19	CDS
chr1	153662477	153662555	-	0.99	3.603	ILF2	ENSG00000143621.17	CDS
chr17	16121169	16121224	-	0.95	3.602	NCOR1	ENSG00000141027.22	CDS
chr15	40199614	40199686	+	0.97	3.602	BUB1B	ENSG00000156970.13	CDS
chr14	55641127	55641139	+	0.98	3.601	KTN1	ENSG00000126777.18	CDS
chr7	10982826	10983133	+	0.98	3.6	PHF14	ENSG00000106443.17	CDS
chr7	91995714	91995788	+	0.98	3.6	AKAP9	ENSG00000127914.19	CDS
chr6	144437713	144437727	+	0.98	3.6	UTRN	ENSG00000152818.19	CDS
chr20	13782849	13782910	-	0.99	3.599	ESF1	ENSG00000089048.15	CDS
chr5	139364567	139364584	+	0.98	3.599	PAIP2	ENSG00000120727.13	CDS
chr9	15490001	15490047	-	0.99	3.598	PSIP1	ENSG00000164985.15	CDS
chr20	37733003	37733029	+	0.97	3.598	CTNNBL1	ENSG00000132792.19	CDS
chr14	44120429	44120480	-	0.98	3.597	ENSG00000259137	ENSG00000259137.1	ncRNA
chr12	76053812	76053905	-	0.98	3.597	NAP1L1	ENSG00000187109.15	CDS
chr3	100146970	100147062	+	0.98	3.597	CMSS1	ENSG00000184220.12	CDS
chr1	222658757	222658811	+	0.98	3.597	MIA3	ENSG00000154305.18	CDS
chr5	163475487	163475549	+	0.99	3.596	HMMR	ENSG00000072571.20	CDS
chr1	226161627	226161641	-	0.97	3.596	ACBD3	ENSG00000182827.9	CDS
chr19	11060044	11060047	+	0.97	3.595	SMARCA4	ENSG00000127616.20	CDS
chr1	25901084	25901088	-	0.97	3.595	STMN1	ENSG00000117632.23	CDS
chr3	121692323	121692342	-	0.99	3.595	GOLGB1	ENSG00000173230.17	CDS
chr11	62145685	62145715	+	0.97	3.594	INCENP	ENSG00000149503.13	CDS
chr11	66059296	66059310	+	0.99	3.594	SF3B2	ENSG00000087365.16	CDS
chr5	140704531	140704556	+	0.98	3.594	ZMAT2	ENSG00000146007.11	CDS
chr5	72194770	72194872	+	0.99	3.593	MAP1B	ENSG00000131711.15	CDS
chr12	92777940	92778008	-	0.98	3.593	EEA1	ENSG00000102189.17	CDS
chr11	108940238	108940348	+	0.99	3.593	DDX10	ENSG00000178105.12	CDS
chr11	108940427	108940493	+	0.98	3.593	DDX10	ENSG00000178105.12	3' UTR
chr2	11201068	11201144	-	0.99	3.592	ROCK2	ENSG00000134318.16	CDS
chrX	27519089	27519131	+	0.99	3.592	RDXP3	ENSG00000238247.2	ncRNA
chr12	79795636	79795641	-	0.97	3.592	PPP1R12A	ENSG00000058272.19	CDS
chr15	58897114	58897117	-	0.99	3.591	SLTM	ENSG00000137776.17	CDS
chr12	124402395	124402415	-	0.97	3.591	NCOR2	ENSG00000196498.14	CDS
chr17	8512607	8512659	-	0.98	3.59	MYH10	ENSG00000133026.14	CDS
chr9	15472707	15472729	-	0.99	3.59	PSIP1	ENSG00000164985.15	CDS
chr13	19633809	19633902	+	0.99	3.59	MPHOSPH8	ENSG00000196199.14	CDS
chr20	31775955	31775970	+	0.97	3.59	TPX2	ENSG00000088325.16	CDS
chr10	12014025	12014054	-	0.97	3.589	UPF2	ENSG00000151461.20	CDS
chr6	18237460	18237500	-	0.98	3.589	DEK	ENSG00000124795.17	CDS
chr10	32022850	32022882	-	0.99	3.589	KIF5B	ENSG00000170759.11	CDS
chr10	89745901	89745959	+	0.97	3.588	KIF20B	ENSG00000138182.15	CDS
chr1	183134725	183134766	+	0.99	3.588	LAMC1	ENSG00000135862.6	CDS
chr3	16317141	16317233	-	0.95	3.587	RFTN1	ENSG00000131378.14	CDS
chr5	34938884	34939013	+	0.98	3.587	DNAJC21	ENSG00000168724.18	CDS
chr3	37325764	37325817	+	0.98	3.587	GOLGA4	ENSG00000144674.18	CDS
chr8	43007911	43007926	+	0.97	3.587	HOOK3	ENSG00000168172.9	CDS
chr17	48851562	48851580	+	0.97	3.587	CALCOCO2	ENSG00000136436.15	CDS
chr7	155680715	155680833	+	0.99	3.587	RBM33	ENSG00000184863.11	CDS
chr1	214637965	214637990	+	0.98	3.587	CENPF	ENSG00000117724.14	CDS
chr6	44247140	44247154	+	0.97	3.586	HSP90AB1	ENSG00000096384.20	5' UTR
chr1	186361626	186361645	-	0.98	3.586	TPR	ENSG00000047410.14	CDS
chr3	37323815	37323850	+	0.97	3.585	GOLGA4	ENSG00000144674.18	CDS
chr14	55628006	55628028	+	0.98	3.585	KTN1	ENSG00000126777.18	CDS
chr1	153662391	153662459	-	0.99	3.585	ILF2	ENSG00000143621.17	CDS
chr12	6769996	6769999	+	0.99	3.584	PTMS	ENSG00000159335.18	CDS
chr9	15472729	15472751	-	0.98	3.584	PSIP1	ENSG00000164985.15	CDS
chr10	32031250	32031279	-	0.99	3.584	KIF5B	ENSG00000170759.11	CDS
chr12	76056099	76056118	-	0.98	3.584	NAP1L1	ENSG00000187109.15	CDS
chr10	119042659	119042672	-	0.96	3.584	EIF3A	ENSG00000107581.13	CDS
chr3	169975606	169975706	+	0.98	3.584	SEC62	ENSG00000008952.17	CDS
chr6	26056008	26056055	-	0.97	3.583	H1-2	ENSG00000187837.4	CDS
chr4	112647193	112647227	+	0.98	3.583	LARP7	ENSG00000174720.18	CDS
chr10	32028427	32028465	-	0.99	3.582	KIF5B	ENSG00000170759.11	CDS
chr7	73477179	73477219	-	0.98	3.582	BAZ1B	ENSG00000009954.11	CDS
chrX	136502861	136502928	+	0.99	3.582	HTATSF1	ENSG00000102241.12	CDS
chrX	77681669	77681770	-	0.99	3.581	ATRX	ENSG00000085224.23	CDS
chr4	39351394	39351436	-	0.99	3.58	RFC1	ENSG00000035928.17	CDS
chr12	92779203	92779259	-	0.98	3.58	EEA1	ENSG00000102189.17	CDS
chr2	99361465	99361477	+	0.99	3.58	EIF5B	ENSG00000158417.11	CDS
chr7	105142470	105142494	-	0.99	3.58	SRPK2	ENSG00000135250.17	CDS
chr3	121694410	121694548	-	0.98	3.58	GOLGB1	ENSG00000173230.17	CDS
chr1	235196087	235196115	-	0.97	3.58	ARID4B	ENSG00000054267.22	CDS
chrX	77681544	77681618	-	0.96	3.579	ATRX	ENSG00000085224.23	CDS
chr1	186352060	186352083	-	0.99	3.579	TPR	ENSG00000047410.14	CDS
chr1	186352005	186352036	-	0.99	3.578	TPR	ENSG00000047410.14	CDS
chr1	235182285	235182362	-	0.98	3.578	ARID4B	ENSG00000054267.22	CDS
chr12	76056138	76056147	-	0.99	3.577	NAP1L1	ENSG00000187109.15	CDS
chr5	163475606	163475628	+	0.97	3.577	HMMR	ENSG00000072571.20	CDS
chr20	34105394	34105420	-	0.98	3.576	EIF2S2	ENSG00000125977.7	CDS
chr14	34794751	34794789	-	0.98	3.576	BAZ1A	ENSG00000198604.11	CDS
chr20	63993408	63993485	+	0.99	3.576	PRPF6	ENSG00000101161.8	CDS
chr11	130121691	130121715	+	0.99	3.575	APLP2	ENSG00000084234.18	CDS
chr14	55633234	55633263	+	0.99	3.574	KTN1	ENSG00000126777.18	CDS
chr1	226164819	226164862	-	0.99	3.574	ACBD3	ENSG00000182827.9	CDS
chr2	231459013	231459040	-	0.98	3.574	NCL	ENSG00000115053.17	CDS
chr14	55627959	55627975	+	0.99	3.573	KTN1	ENSG00000126777.18	CDS
chr11	77698599	77698637	-	0.96	3.573	RSF1	ENSG00000048649.14	CDS
chr10	119058116	119058136	-	0.96	3.573	EIF3A	ENSG00000107581.13	CDS
chr9	35685112	35685134	-	0.99	3.572	TPM2	ENSG00000198467.16	CDS
chr4	41646482	41646506	+	0.98	3.572	LIMCH1	ENSG00000064042.18	CDS
chr15	58887287	58887380	-	0.99	3.572	SLTM	ENSG00000137776.17	CDS
chr11	27889651	27889654	-	0.99	3.571	HSP90AA2P	ENSG00000224411.3	ncRNA
chr4	38932233	38932288	+	0.98	3.571	FAM114A1	ENSG00000197712.12	CDS
chr13	102858303	102858344	+	0.98	3.571	ERCC5|BIVM-ERCC5	ENSG00000134899.24||ENSG00000270181.3	CDS
chr2	27384012	27384081	-	0.98	3.57	PPM1G	ENSG00000115241.11	CDS
chr12	95485881	95485912	+	0.97	3.57	METAP2	ENSG00000111142.14	CDS
chr9	98012469	98012472	+	0.99	3.57	ANP32B	ENSG00000136938.9	CDS
chr13	114301751	114301889	+	0.99	3.57	UPF3A	ENSG00000169062.15	CDS
chr4	140396091	140396094	-	0.99	3.57	CLGN	ENSG00000153132.13	CDS
chr5	140659065	140659086	+	0.95	3.57	IK	ENSG00000113141.19	CDS
chr5	141319221	141319315	-	0.99	3.57	TAF7	ENSG00000178913.9	CDS
chr11	17311195	17311255	+	0.941	3.569	NUCB2	ENSG00000070081.18	CDS
chr10	32031217	32031250	-	0.99	3.569	KIF5B	ENSG00000170759.11	CDS
chr14	55634525	55634527	+	0.98	3.569	KTN1	ENSG00000126777.18	CDS
chr1	205750120	205750127	-	0.99	3.569	NUCKS1	ENSG00000069275.13	5' UTR
chr1	235219792	235219872	-	0.98	3.569	ARID4B	ENSG00000054267.22	CDS
chr15	56464199	56464246	-	0.97	3.568	MNS1	ENSG00000138587.6	CDS
chr19	2111806	2111829	-	0.99	3.567	AP3D1	ENSG00000065000.20	CDS
chrX	53413273	53413307	-	0.98	3.567	SMC1A	ENSG00000072501.19	CDS
chr11	110247766	110247799	-	0.97	3.567	RDX	ENSG00000137710.17	CDS
chr1	186341254	186341322	-	0.99	3.567	TPR	ENSG00000047410.14	CDS
chr17	8508652	8508683	-	0.98	3.566	MYH10	ENSG00000133026.14	CDS
chr11	17311868	17311925	+	0.98	3.566	NUCB2	ENSG00000070081.18	CDS
chr8	123371764	123371777	-	0.99	3.566	ATAD2	ENSG00000156802.13	CDS
chr14	55650599	55650637	+	0.99	3.565	KTN1	ENSG00000126777.18	CDS
chr12	103943798	103943810	+	0.99	3.565	HSP90B1	ENSG00000166598.16	CDS
chr11	66061682	66061689	+	0.98	3.564	SF3B2	ENSG00000087365.16	CDS
chr16	89284079	89284123	-	0.98	3.564	ANKRD11	ENSG00000167522.17	CDS
chr7	117542130	117542148	+	0.99	3.564	CFTR	ENSG00000001626.18	Intron
chr7	117542148	117542155	+	0.99	3.564	CFTR	ENSG00000001626.18	Intron
chr7	117542155	117542159	+	0.99	3.564	CFTR	ENSG00000001626.18	Intron
chr4	13604080	13604126	-	0.99	3.563	BOD1L1	ENSG00000038219.13	CDS
chr6	30571529	30571544	+	0.98	3.563	ABCF1	ENSG00000204574.14	CDS
chr14	49789224	49789329	-	0.98	3.563	NEMF	ENSG00000165525.18	CDS
chr1	77942023	77942069	+	0.98	3.563	NEXN	ENSG00000162614.19	CDS
chr14	55627975	55627983	+	0.98	3.562	KTN1	ENSG00000126777.18	CDS
chr10	68761068	68761116	+	0.99	3.562	CCAR1	ENSG00000060339.14	CDS
chr11	96353635	96353717	-	0.99	3.562	CCDC82	ENSG00000149231.16	CDS
chr16	11839799	11839874	-	0.99	3.561	RSL1D1	ENSG00000171490.13	CDS
chr20	17660279	17660317	-	0.99	3.561	RRBP1	ENSG00000125844.17	CDS
chr16	53303923	53303952	+	0.98	3.561	CHD9	ENSG00000177200.18	CDS
chr14	55648084	55648102	+	0.99	3.561	KTN1	ENSG00000126777.18	CDS
chr10	114144509	114144619	-	0.99	3.561	CCDC186	ENSG00000165813.20	CDS
chr8	123371777	123371793	-	0.99	3.561	ATAD2	ENSG00000156802.13	CDS
chr12	124402415	124402529	-	0.99	3.561	NCOR2	ENSG00000196498.14	CDS
chr6	44250056	44250087	+	0.99	3.56	HSP90AB1	ENSG00000096384.20	CDS
chr14	55640932	55640967	+	0.97	3.56	KTN1	ENSG00000126777.18	CDS
chr3	37327205	37327243	+	0.99	3.559	GOLGA4	ENSG00000144674.18	CDS
chr10	50265036	50265118	+	0.99	3.559	DYNC1I2P1	ENSG00000225137.1	ncRNA
chr10	68960190	68960250	+	0.95	3.559	DDX21	ENSG00000165732.14	CDS
chr1	171532524	171532529	+	0.99	3.559	PRRC2C	ENSG00000117523.18	CDS
chr1	186352036	186352060	-	0.99	3.559	TPR	ENSG00000047410.14	CDS
chr21	26021938	26021942	-	0.99	3.558	APP	ENSG00000142192.21	CDS
chr1	235196038	235196087	-	0.99	3.558	ARID4B	ENSG00000054267.22	CDS
chr6	4031903	4031922	+	0.98	3.557	PRPF4B	ENSG00000112739.17	CDS
chr6	26055982	26056008	-	0.99	3.557	H1-2	ENSG00000187837.4	CDS
chr2	27383549	27383596	-	0.96	3.557	PPM1G	ENSG00000115241.11	CDS
chr1	66946290	66946297	+	0.98	3.557	MIER1	ENSG00000198160.15	CDS
chr7	73492889	73492918	-	0.99	3.557	BAZ1B	ENSG00000009954.11	CDS
chr3	179261100	179261138	-	0.99	3.557	LRRFIP1P1	ENSG00000240429.1	ncRNA
chr1	222628145	222628271	+	0.98	3.557	MIA3	ENSG00000154305.18	CDS
chr17	30184918	30185032	+	0.97	3.556	NSRP1	ENSG00000126653.18	CDS
chr15	43814950	43814963	-	0.99	3.556	MFAP1	ENSG00000140259.7	CDS
chrX	53409481	53409508	-	0.98	3.556	SMC1A	ENSG00000072501.19	CDS
chrX	53411759	53411765	-	0.99	3.556	SMC1A	ENSG00000072501.19	CDS
chr2	109553082	109553176	-	0.99	3.556	SEPTIN10	ENSG00000186522.15	CDS
chr3	37327334	37327338	+	0.99	3.555	GOLGA4	ENSG00000144674.18	CDS
chr9	98005008	98005059	+	0.98	3.555	ANP32B	ENSG00000136938.9	CDS
chr14	55637209	55637263	+	0.98	3.554	KTN1	ENSG00000126777.18	CDS
chr9	86323100	86323186	-	0.99	3.554	TUT7	ENSG00000083223.18	CDS
chr17	7894417	7894439	+	0.99	3.553	CHD3	ENSG00000170004.19	CDS
chr12	79788747	79788782	-	0.99	3.553	PPP1R12A	ENSG00000058272.19	CDS
chr10	116940457	116940543	-	0.98	3.553	SHTN1	ENSG00000187164.20	CDS
chr20	62136900	62136947	-	0.98	3.552	PSMA7	ENSG00000101182.15	CDS
chr14	63735029	63735090	+	0.99	3.552	EIF2S2P1	ENSG00000258778.2	ncRNA
chr4	189474414	189474454	+	0.97	3.552	HSP90AA4P	ENSG00000205100.2	ncRNA
chr4	189474454	189474476	+	0.99	3.552	HSP90AA4P	ENSG00000205100.2	ncRNA
chr5	34941093	34941100	+	0.98	3.551	DNAJC21	ENSG00000168724.18	CDS
chr15	41466221	41466252	+	0.97	3.551	RTF1	ENSG00000137815.15	CDS
chr9	86301382	86301447	-	0.99	3.551	TUT7	ENSG00000083223.18	CDS
chr1	186341358	186341389	-	0.99	3.551	TPR	ENSG00000047410.14	CDS
chr10	21882281	21882338	-	0.99	3.55	DNAJC1	ENSG00000136770.11	CDS
chr20	33811603	33811648	+	0.98	3.55	CHMP4B	ENSG00000101421.4	CDS
chr10	42817317	42817376	+	0.99	3.55	BMS1	ENSG00000165733.8	CDS
chrX	103357664	103357693	+	0.98	3.55	TCEAL9	ENSG00000185222.10	CDS
chr10	42816631	42816672	+	0.99	3.549	BMS1	ENSG00000165733.8	CDS
chr2	152658953	152659003	-	0.99	3.549	PRPF40A	ENSG00000196504.21	CDS
chr3	37327788	37327825	+	0.99	3.548	GOLGA4	ENSG00000144674.18	CDS
chr6	44445711	44445769	+	0.98	3.548	CDC5L	ENSG00000096401.8	CDS
chr1	77918179	77918270	+	0.95	3.548	NEXN	ENSG00000162614.19	CDS
chr14	91384432	91384464	-	0.99	3.548	CCDC88C	ENSG00000015133.20	Intron
chr6	151349799	151349875	+	0.99	3.548	AKAP12	ENSG00000131016.17	CDS
chr5	160403250	160403323	-	0.97	3.548	SLU7	ENSG00000164609.10	CDS
chr10	12029254	12029298	-	0.99	3.547	UPF2	ENSG00000151461.20	CDS
chr9	15469942	15469994	-	0.96	3.547	PSIP1	ENSG00000164985.15	CDS
chr14	55648815	55648825	+	0.99	3.547	KTN1	ENSG00000126777.18	CDS
chr15	58899777	58899861	-	0.99	3.547	SLTM	ENSG00000137776.17	CDS
chr3	143051009	143051026	+	0.98	3.547	U2SURP	ENSG00000163714.18	CDS
chr12	56181526	56181598	-	0.98	3.546	SMARCC2	ENSG00000139613.12	CDS
chr11	66058948	66058998	+	0.96	3.546	SF3B2	ENSG00000087365.16	CDS
chr13	19646531	19646599	+	0.99	3.545	MPHOSPH8	ENSG00000196199.14	CDS
chr21	26021942	26021945	-	0.98	3.545	APP	ENSG00000142192.21	CDS
chr1	70246817	70246847	+	0.99	3.545	SRSF11	ENSG00000116754.14	CDS
chr5	150398403	150398453	+	0.98	3.545	TCOF1	ENSG00000070814.22	CDS
chr1	205729573	205729621	-	0.99	3.545	NUCKS1	ENSG00000069275.13	CDS
chr17	29495711	29495733	+	0.99	3.544	TAOK1	ENSG00000160551.12	CDS
chr4	41650396	41650489	+	0.98	3.544	LIMCH1	ENSG00000064042.18	CDS
chr17	8495130	8495194	-	0.99	3.543	MYH10	ENSG00000133026.14	CDS
chr16	89282464	89282498	-	0.99	3.543	ANKRD11	ENSG00000167522.17	CDS
chr10	119059253	119059286	-	0.97	3.542	EIF3A	ENSG00000107581.13	CDS
chr10	32022139	32022142	-	0.99	3.541	KIF5B	ENSG00000170759.11	CDS
chr11	35663453	35663654	+	0.98	3.541	TRIM44	ENSG00000166326.7	CDS
chr7	92079216	92079301	+	0.99	3.541	AKAP9	ENSG00000127914.19	CDS
chr3	112638031	112638236	-	0.98	3.541	CCDC80	ENSG00000091986.16	CDS
chr2	232816959	232816991	+	0.99	3.541	GIGYF2	ENSG00000204120.16	CDS
chr3	143051026	143051049	+	0.99	3.54	U2SURP	ENSG00000163714.18	CDS
chr6	35870343	35870438	-	0.98	3.539	SRPK1	ENSG00000096063.16	CDS
chr17	67912593	67912663	+	0.99	3.539	BPTF	ENSG00000171634.19	CDS
chr10	119058265	119058296	-	0.99	3.538	EIF3A	ENSG00000107581.13	CDS
chr1	51840258	51840280	-	0.99	3.537	NRDC	ENSG00000078618.23	CDS
chr6	89662855	89662883	-	0.99	3.537	MDN1	ENSG00000112159.13	CDS
chr4	106327509	106327566	+	0.98	3.537	AIMP1	ENSG00000164022.18	CDS
chr6	7580715	7580909	+	0.98	3.536	DSP	ENSG00000096696.15	CDS
chr5	34950168	34950232	+	0.99	3.536	DNAJC21	ENSG00000168724.18	CDS
chr4	87892309	87892314	+	0.99	3.536	HSP90AB3P	ENSG00000183199.6	ncRNA
chrX	100802082	100802153	+	0.99	3.536	RAD21P1	ENSG00000238116.2	ncRNA
chr11	110233324	110233366	-	0.97	3.536	RDX	ENSG00000137710.17	CDS
chr3	168041391	168041427	-	0.96	3.536	GOLIM4	ENSG00000173905.9	CDS
chr1	214637997	214638001	+	0.98	3.536	CENPF	ENSG00000117724.14	CDS
chr4	2952319	2952362	-	0.99	3.534	NOP14	ENSG00000087269.16	CDS
chr12	6770156	6770158	+	0.98	3.534	PTMS	ENSG00000159335.18	CDS
chr8	61553030	61553077	-	0.97	3.534	ASPH	ENSG00000198363.18	CDS
chr5	163474160	163474204	+	0.98	3.534	HMMR	ENSG00000072571.20	CDS
chr6	4032364	4032468	+	0.99	3.533	PRPF4B	ENSG00000112739.17	CDS
chr11	17330242	17330301	+	0.99	3.532	NUCB2	ENSG00000070081.18	CDS
chr5	34950232	34950259	+	0.98	3.532	DNAJC21	ENSG00000168724.18	CDS
chr15	58912578	58912610	-	0.96	3.532	SLTM	ENSG00000137776.17	CDS
chr1	35745450	35745454	-	0.99	3.531	CLSPN	ENSG00000092853.14	CDS
chr10	68765943	68766027	+	0.98	3.531	CCAR1	ENSG00000060339.14	CDS
chr16	82164115	82164194	-	0.99	3.531	MPHOSPH6	ENSG00000135698.10	CDS
chr4	140392254	140392350	-	0.98	3.531	CLGN	ENSG00000153132.13	CDS
chr14	34780250	34780297	-	0.99	3.529	BAZ1A	ENSG00000198604.11	CDS
chr14	55672945	55672958	+	0.99	3.528	KTN1	ENSG00000126777.18	CDS
chrX	77664641	77664716	-	0.99	3.528	ATRX	ENSG00000085224.23	CDS
chr7	117542128	117542130	+	0.99	3.528	CFTR	ENSG00000001626.18	Intron
chr2	169810868	169810927	+	0.99	3.528	SSB	ENSG00000138385.16	CDS
chr10	12001756	12001775	-	0.97	3.527	UPF2	ENSG00000151461.20	CDS
chr22	36299026	36299039	-	0.98	3.527	MYH9	ENSG00000100345.23	CDS
chr3	37326924	37326993	+	0.98	3.527	GOLGA4	ENSG00000144674.18	CDS
chr8	38843380	38843396	+	0.97	3.527	TACC1	ENSG00000147526.20	CDS
chr5	141319315	141319416	-	0.97	3.527	TAF7	ENSG00000178913.9	CDS
chr10	32033844	32033877	-	0.98	3.526	KIF5B	ENSG00000170759.11	CDS
chr20	17614735	17614763	-	0.98	3.524	RRBP1	ENSG00000125844.17	CDS
chr10	119042118	119042140	-	0.99	3.524	EIF3A	ENSG00000107581.13	CDS
chr8	18013963	18014005	+	0.99	3.523	PCM1	ENSG00000078674.19	CDS
chr22	35265295	35265396	+	0.99	3.523	HMGXB4	ENSG00000100281.14	CDS
chr10	68787926	68787930	+	0.97	3.523	CCAR1	ENSG00000060339.14	CDS
chr15	70666785	70666858	-	0.97	3.523	UACA	ENSG00000137831.15	CDS
chr14	73111055	73111073	+	0.98	3.523	RBM25	ENSG00000119707.14	CDS
chr8	127897182	127897211	+	0.99	3.523	PVT1	ENSG00000249859.14	ncRNA
chr1	156595165	156595254	-	0.99	3.523	GPATCH4	ENSG00000160818.17	ncRNA
chr3	108206654	108206699	-	0.98	3.522	IFT57	ENSG00000114446.5	CDS
chr9	128692688	128692720	+	0.99	3.522	SET	ENSG00000119335.18	CDS
chr4	4274489	4274517	-	0.99	3.521	LYAR	ENSG00000145220.14	CDS
chr4	70690002	70690051	+	0.97	3.521	UTP3	ENSG00000132467.4	CDS
chr5	96747344	96747392	+	0.99	3.521	CAST	ENSG00000153113.24	CDS
chr10	116954120	116954208	-	0.96	3.521	SHTN1	ENSG00000187164.20	CDS
chr4	41662900	41662977	+	0.99	3.52	LIMCH1	ENSG00000064042.18	CDS
chr9	120550806	120550830	-	0.99	3.52	CDK5RAP2	ENSG00000136861.19	CDS
chr3	37319148	37319151	+	0.98	3.519	GOLGA4	ENSG00000144674.18	CDS
chr5	71510604	71510723	+	0.98	3.519	BDP1	ENSG00000145734.20	CDS
chr12	103942690	103942699	+	0.98	3.519	HSP90B1	ENSG00000166598.16	CDS
chr2	117935493	117935530	-	0.97	3.519	CCDC93	ENSG00000125633.11	CDS
chr2	171725708	171725713	+	0.99	3.519	DYNC1I2	ENSG00000077380.16	CDS
chr10	12029097	12029148	-	0.99	3.518	UPF2	ENSG00000151461.20	CDS
chr17	50744651	50744682	+	0.98	3.518	LUC7L3	ENSG00000108848.16	CDS
chr4	87892314	87892399	+	0.97	3.518	HSP90AB3P	ENSG00000183199.6	ncRNA
chr4	103151289	103151345	-	0.98	3.518	CENPE	ENSG00000138778.14	CDS
chr17	4672295	4672305	-	0.99	3.517	PELP1	ENSG00000141456.16	CDS
chr1	70244778	70244815	+	0.98	3.517	SRSF11	ENSG00000116754.14	CDS
chr1	150223204	150223237	-	0.98	3.517	ANP32E	ENSG00000143401.15	CDS
chr10	42796560	42796686	+	0.99	3.516	BMS1	ENSG00000165733.8	CDS
chr14	55639989	55640003	+	0.98	3.516	KTN1	ENSG00000126777.18	CDS
chr1	205727706	205727737	-	0.99	3.516	NUCKS1	ENSG00000069275.13	CDS
chr3	47701309	47701344	-	0.99	3.515	SMARCC1	ENSG00000173473.11	CDS
chr1	77918131	77918179	+	0.99	3.515	NEXN	ENSG00000162614.19	CDS
chr12	95485912	95485930	+	0.99	3.515	METAP2	ENSG00000111142.14	CDS
chr7	134933031	134933110	+	0.99	3.515	CALD1	ENSG00000122786.20	CDS
chr1	209830943	209830979	+	0.97	3.515	UTP25	ENSG00000117597.18	CDS
chr19	5600133	5600259	-	0.98	3.514	SAFB2	ENSG00000130254.12	CDS
chr8	94529122	94529138	-	0.98	3.514	VIRMA	ENSG00000164944.12	CDS
chr2	99379033	99379053	+	0.99	3.514	EIF5B	ENSG00000158417.11	CDS
chr8	127897337	127897425	+	0.98	3.514	PVT1	ENSG00000249859.14	ncRNA
chr19	45408850	45408979	+	0.97	3.513	POLR1G	ENSG00000117877.11	CDS
chr17	61069855	61069884	+	0.99	3.513	RPL23AP74	ENSG00000227694.1	ncRNA
chr7	73477759	73477794	-	0.98	3.513	BAZ1B	ENSG00000009954.11	CDS
chrX	154776854	154776872	+	0.99	3.513	DKC1	ENSG00000130826.19	CDS
chr10	42816598	42816631	+	0.98	3.512	BMS1	ENSG00000165733.8	CDS
chr11	66059243	66059271	+	0.99	3.512	SF3B2	ENSG00000087365.16	CDS
chr4	75655851	75655857	-	0.98	3.512	G3BP2	ENSG00000138757.15	CDS
chr2	202303444	202303516	+	0.99	3.512	NOP58	ENSG00000055044.11	3' UTR
chr15	58892955	58893032	-	0.98	3.511	SLTM	ENSG00000137776.17	CDS
chr15	66501830	66501846	-	0.98	3.511	RPL4	ENSG00000174444.15	CDS
chr14	73103411	73103478	+	0.95	3.511	RBM25	ENSG00000119707.14	CDS
chrX	119843209	119843271	-	0.98	3.511	UPF3B	ENSG00000125351.14	CDS
chr3	143053721	143053757	+	0.99	3.511	U2SURP	ENSG00000163714.18	CDS
chr1	13778649	13778715	+	0.98	3.51	PRDM2	ENSG00000116731.23	CDS
chr11	66063521	66063539	+	0.98	3.51	SF3B2	ENSG00000087365.16	CDS
chr19	2111764	2111806	-	0.98	3.509	AP3D1	ENSG00000065000.20	CDS
chr15	41452902	41452994	+	0.98	3.509	RTF1	ENSG00000137815.15	CDS
chr14	55618114	55618135	+	0.95	3.509	KTN1	ENSG00000126777.18	CDS
chr8	67093599	67093641	+	0.97	3.509	CSPP1	ENSG00000104218.16	CDS
chr12	71644207	71644257	-	0.97	3.509	ZFC3H1	ENSG00000133858.17	CDS
chr17	8500822	8500934	-	0.98	3.508	MYH10	ENSG00000133026.14	CDS
chr17	61069884	61069913	+	0.99	3.508	RPL23AP74	ENSG00000227694.1	ncRNA
chr4	13604889	13604916	-	0.98	3.507	BOD1L1	ENSG00000038219.13	CDS
chr15	58887380	58887409	-	0.97	3.507	SLTM	ENSG00000137776.17	CDS
chr15	58899640	58899650	-	0.97	3.507	SLTM	ENSG00000137776.17	CDS
chr14	92014384	92014420	-	0.95	3.507	TRIP11	ENSG00000100815.12	CDS
[truncated: 3,336 more rows]
